# Supplementary material for: Utility of Exome Sequencing for Diagnosis in Unexplained Pediatric-Onset Epilepsy
Source: PubMed Central journal article supplement (PMC10359957; doi:10.1001/jamanetworkopen.2023.24380), 2023-07-20
Supplement: jamanetwopen-e2324380-s001.pdf [file jamanetwopen-e2324380-s001.pdf]

## Supplemental Online Content

Koh HY, Smith L, Wiltrout KN, et al; BCH Neurology Referral and Phenotyping Group. Utility of exome sequencing for diagnosis in unexplained pediatric-onset epilepsy. *JAMA Netw Open*. 2023;6(7):e2324380. doi:10.1001/jamanetworkopen.2023.24380

### **eMethods.**

**eTable 1.** Clinical and Diagnostic Genetic Findings in 89 Patients With SNVs

**eTable 2.** A Phenotype-Driven Epilepsy Gene List

**eTable 3.** Nondiagnostic VUS in Epilepsy-Related Genes

**eTable 4.** Novel Candidate Epilepsy Genes and Their Associated Phenotypes

**eTable 5.** Clinical and Diagnostic Genetic Findings in 11 Cases With CNVs

**eTable 6.** Bivariate and Multivariate Regression Model of Phenotypic Variables to Diagnostic Yield by ES

**eFigure 1.** Diagnostic Yield and Age of Seizure Onset According to Epilepsy Type

**eFigure 2.** Established and Candidate Epilepsy Genes in the Study Cohort

**eFigure 2.** Variant Types Among the Diagnostic SNVs and CNVs

**eFigure 3.** Clinical Features in Patients With Epilepsy Associated With Diagnostic Variants

This supplemental material has been provided by the authors to give readers additional information about their work.

## eMethods

### Sample processing and exome sequencing

Proband DNA and, whenever available, parents' DNA from whole blood or buccal swab were extracted as previously described.<sup>1</sup> Samples were sent to GeneDx (Gaithersburg, MD), a Clinical Laboratory Improvement Amendments (CLIA)-certified testing facility, where DNA was extracted and sequenced. Exomes were captured to produce libraries using xGen probes (Integrated DNA Technologies, IO). The coverage, depth, and quality control requirements are described previously<sup>2</sup>: average coverage across the whole exome sequencing (ES) was 100X and >95% of targets were covered at 20X. The exome by GeneDx medical had >99% of targets covered at 20X and an average depth of ~110X. All sequencing data passed specific minimal quality control requirements: thresholds for mapping percent to hg19 (>95%), target coverage at 10X (90%, 97–98% typical), mean target coverage (50X, average 100–120X), duplicate read percentage (<30%, <10% typical), and read-quality metrics (80% Q30). The remaining samples were maintained in the CLIA-certified facility to ensure DNA availability for future clinical confirmation (i.e., Sanger sequencing and targeted amplicon). Whole ES raw data in the form of FASTQ files were generated.

### Bioinformatics pipeline

FASTQ files were aligned into hg19 as previously described<sup>2</sup>: once sequencing was completed, the raw whole ES data were returned to Boston Children's Hospital's Amazon Web Services account. The exome datasets were uniformly processed through a standard variant calling pipeline managed by NextCODE in a research environment.<sup>3</sup> Adapters were trimmed using Skewer v0.2.1,<sup>4</sup> FASTQ analysis was performed by FastQC v0.11.7<sup>5</sup> and base quality was calculated using BMap v37.97.<sup>6</sup> Read alignment, read depth calculation, realignment, recalibration, and variant calling were performed by Sentieon v201808.03<sup>7</sup>: BWA, HSMetricsAlgo, WGSMetricsAlgo, markduplication and Realigner, QualCal, Haplotyper and GVCFTyper. Verifybamid 1.1.3<sup>8</sup> was used to check contamination and GATK 4.1.2.093 to count reads in bins. NextCODE GORpipe 4.3.0<sup>3</sup> converted other variant data to genomically ordered relational (GOR) format and annotated variants with Variant Effect Predictor (VEP) 96.2 and custom tools.<sup>9</sup>

### Variant identification

Single nucleotide variants (SNVs) were annotated using Sequence Miner and Gregor (Genuity Science, Ireland). For those with parental segregation data available, we filtered data for *de novo* heterozygous variants and homozygous/compound heterozygous variants (inherited and/or *de novo*) across all genes (Figure 1). Additionally, we curated a list of established epilepsy-associated genes from Online Mendelian Inheritance in Man (OMIM) or the published literature (eTable 2) and conducted an epilepsy-focused evaluation across the entire cohort, including cases without parental data.

### SNV identification

We identified rare, potentially clinically relevant variants predicted to be damaging based on the following criteria: (a) previously reported as pathogenic,<sup>10</sup> (b) minor allele frequency (MAF) <0.001% in Genome Aggregation Database (gnomAD, <https://gnomad.broadinstitute.org/>)<sup>11</sup> for autosomal dominant (AD), <0.1% for autosomal recessive (AR); (c) absence of homozygous (for AR) or hemizygous (for X-linked) variants in gnomAD; (d) location (exonic or splicing regions); (e) genotype quality =99 and mean allele read depth >10; (f) conservation across  $\geq 5$  species for missense variants; (g) 'deleteriousness' of missense variants: Combined Annotation Dependent Depletion (CADD) score >20<sup>12</sup> and Variant Effect Predictor (VEP) max score >0.9; and (g) for splice site variants, predicted splicing effects ('cryptic splicing variants', SpliceAI delta score  $\geq 0.15$ ).<sup>13</sup> We visualized all variants of interest by direct inspection in the Integrative Genomics Viewer<sup>14</sup> and Sequence Miner. We defined the following as damaging variants: 1) loss-of-function (LoF) including stop-gain, frameshift, and altered canonical splice site, 2) deleterious missense, 3) in-frame indels, and 4) cryptic splicing variants. Inheritance patterns were considered alongside the variant for established disease genes. We defined mosaic variants as those with variant allele fraction (VAF) <0.2 (vs. germline variants, which have VAFs of roughly 0.5).

### CNV identification

We identified CNVs using the Genome Analysis Toolkit (GATK) Germline CNV Caller as described.<sup>15</sup> A model was first built with 'cohort mode' using 500 random samples that were sequenced via the same method, and then CNVs were called for each sample with 'case mode'. Rare, potentially clinically relevant variants were then identified as (a) overlapping recurrent CNV syndrome regions<sup>16</sup> or an epilepsy-associated gene, (b) internal cohort AF <0.2% for dominant inheritance, <5% for recessive inheritance, (c) internal cohort homozygous count (for autosomal recessive) or hemizygous count (for X-linked) <6, and (d) exonic deletion or intragenic duplication (i.e., loss-of-function duplication). We assessed inherited and *de novo* variants accounting for *de novo*/autosomal dominant, autosomal recessive, X-linked dominant, and X-linked recessive models through segregation. Inheritance patterns were considered alongside the variant for established disease genes.

## eTables

### eTable 1. Clinical and Diagnostic Genetic Findings in 89 Patients With SNVs

| Gene    | Variant                            | Inheritance | Zygoty | AF         | ACMG/AMP classification (evidence) | Cases | Seizure type(s)                                          | ID         | ASD | ASM response* |
|---------|------------------------------------|-------------|--------|------------|------------------------------------|-------|----------------------------------------------------------|------------|-----|---------------|
| ANKRD11 | c.3039_3045del p.Asp1013GluTer303  | de novo     | hetero | N/A        | P (PVS1, PS2, PM2)                 | 0783  | FIA (motor) tonic                                        | Borderline | N   | Refractory    |
|         | c.7535G>A p.Arg2512Gln14609        | unknown     | hetero | N/A        | P (PP5, PM1, PM2, PM5, PP3, BP1)   | 1111  | GES, generalized tonic, GTCS                             | Severe     | N   | Refractory    |
| ARHGEF9 | c.1285del p.Glu429LysfsTer19       | unknown     | hetero | N/A        | LP (PM2, PVS1)                     | 0613  | Febrile generalized motor (4m), focal, rare GTC, atonic  | Mild       | Y   | Refractory    |
| ARID1B  | c.3586 C>T p.Gln1196Ter            | de novo     | hetero | N/A        | P (PVS1, PS2, PM2)                 | 0477  | Focal motor to bilateral tonic-clonic                    | Mild       | N   | Refractory    |
| ATN1    | c.3193C>T p.Gln1065Ter             | de novo     | hetero | N/A        | VUS                                | 1024  | Generalized myoclonic, GTCS                              | Mild       | N   | Refractory    |
| BCL11A  | c.198C>G p.His66Gln                | unknown     | hetero | N/A        | LP (PS1, PM2, PP2)                 | 0544  | GTCS; generalized absence, typical with eyelid myoclonia | Mild       | N   | Controlled    |
| BRAF    | c.770A>G p.Gln257Arg               | de novo     | hetero | N/A        | P (PS2_VS, PS3, PM2)               | 0857  | Motor tonic-clonic                                       | Moderate   | N   | Controlled    |
| BRAT1   | c.1925C>A p.Ala642Glu              | paternal    | hetero | 0.004119   | LP (PM3_Strong, PM2, BP4)          | 0529  | FIA (nonmotor) autonomic                                 | Profound   | N   | Refractory    |
|         | c.294dupA p.Leu99ThrfsTer92        | maternal    | hetero | N/A        | P (PVS1, PM3_Strong)               |       |                                                          |            |     |               |
| BRWD3   | c.4080+1G>A                        | maternal    | hemi   | N/A        | LP (PM2, PVS1)                     | 0484  | Focal with secondary generalization                      | Severe     | Y   | Controlled    |
| CACNA1A | c.601C>T p.Arg201Trp               | unknown     | hetero | N/A        | LP (PM1, PM2, PP2, PP3)            | 0558  | Generalized absence, typical                             | Borderline | N   | Refractory    |
| CACNA1G | c.3568C>T p.Arg1190Ter             | de novo     | hetero | N/A        | VUS                                | 0860  | Generalized absence, typical                             | N/A        | N   | Refractory    |
| CHD2    | c.2876+3_2876+6delAAGT             | de novo     | hetero | N/A        | LP (PM2, PP3, PS2, PP4)            | 0421  | GTCS; generalized absence, typical with eyelid myoclonia | Mild       | Y   | Refractory    |
|         | c.3895_3896insC p.Val1299AlafsTer5 | unknown     | hetero | N/A        | P (PM2, PVS1, PP4)                 | 0634  | GTCS; generalized absence, typical                       | Mild       | N   | Refractory    |
| CLN8    | c.784G>A p.Asp262Asn               | unknown     | hetero | 0          | LP (PM2, PM3, PP3)                 | 0718  | GTCS                                                     | Mild       | Y   | Controlled    |
|         | c.610C>T p.Arg204Cys               | maternal    | hetero | 0.00003183 | P (PM1, PM2, PP2, PP3, PP5)        |       |                                                          |            |     |               |
| CREBBP  | c.5315T>A p.Ile1772Asn             | unknown     | hetero | N/A        | LP (PM2, PM1, PP4, PP3)            | 0564  | FIA (motor) to bilateral tonic-clonic                    | Moderate   | N   | Controlled    |
| CSNK2A1 | c.921T>G p.Tyr307Ter               | de novo     | hetero | N/A        | LP (PS2, PM2)                      | 0798  | Generalized myoclonic                                    | Moderate   | N   | Controlled    |
| CSNK2B  | c.557+1G>A                         | unknown     | hetero | N/A        | LP (PM2, PVS1)                     | 0648  | GTCS                                                     | Severe     | N   | Refractory    |
| CYFIP2  | c.2542A>G                          | de novo     | hetero | N/A        | LP (PM2, PP3, PS2)                 | 0759  | FES, FIA (nonmotor) behavioral arrest                    | Borderline | N   | Refractory    |

|                |                             |                |        |             |                              |      |                                                                             |            |   |            |  |
|----------------|-----------------------------|----------------|--------|-------------|------------------------------|------|-----------------------------------------------------------------------------|------------|---|------------|--|
|                | p.Met848Val                 |                |        |             |                              |      |                                                                             |            |   |            |  |
| <i>DEPDC5</i>  | c.363+1G>A                  | paternal       | hetero | N/A         | LP (PM2, PVS1)               | 0840 | FIA (nonmotor) behavioral arrest to bilateral clonic                        | N/A        | N | Controlled |  |
|                | c.667A>G<br>p.Arg223Gly     | maternal       | hetero | N/A         | VUS                          | 0434 | Focal motor to bilateral tonic-clonic                                       | N/A        | N | Refractory |  |
|                | c.1459C>T<br>p.Arg487Ter    | unknown        | hetero | N/A         | P (PVS1, PM2, PP3, PP5)      | 1107 | GTCS                                                                        | Borderline |   | Controlled |  |
| <i>DYNC1H1</i> | c.5864G>T<br>p.Gly1955Val   | <i>de novo</i> | hetero | N/A         | LP (PM2, PP3, PS2, PP2)      | 0360 | GES                                                                         | Borderline | Y | Controlled |  |
| <i>EEF1A2</i>  | c.364G>A<br>p.Glu122Lys     | <i>de novo</i> | hetero | N/A         | P (PM2, PS2_VS, PP3)         | 0818 | Generalized absence, typical; generalized tonic; generalized myoclonic      | Severe     | N | Controlled |  |
| <i>FRRS1L</i>  | c.737_739del<br>p.Gly246del | unknown        | homo   | 0.002402    | P (PM2, PS1, PM3_S)          | 0460 | Generalized tonic, GTCS                                                     | Profound   | N | Refractory |  |
| <i>FOXP1</i>   | c.-448G>C                   | unknown        | hetero | N/A         | VUS                          | 0612 | FIA (motor) automatisms (oromotor) to bilateral tonic-clonic                | Moderate   | Y | Refractory |  |
| <i>GABRA5</i>  | c.902C>T<br>p.Thr301Met     | <i>de novo</i> | hetero | N/A         | LP (PM1, PM2, PM5, PP2, PP3) | 1097 | Frontal to bilateral tonic-clonic                                           | Mild       | N | Controlled |  |
| <i>GABRG2</i>  | c.1087C>T<br>p.Arg363Trp    | unknown        | hetero | N/A         | LP (PM2, PM5, PP2, PP3, PP5) | 0872 | GTCS                                                                        | N/A        | N | Controlled |  |
|                | c.542C>A<br>p.Thr181Asn     | maternal       | hetero | N/A         | LP (PM2, PP2, PP3, PP4)      | 0976 | FA (motor) clonic (mouth), generalized myoclonic (shoulder, eye fluttering) | N/A        | N | Refractory |  |
| <i>GFAP</i>    | c.882C>A<br>p.Cys294Ter     | unknown        | hetero | 0.000004023 | VUS                          | 0508 | Febrile (2y), generalized convulsive seizures                               | Mild       | N | Controlled |  |
| <i>GPHN</i>    | c.1471A>T<br>p.Arg491Ter    | unknown        | hetero | N/A         | P (PVS1, PM2, PP3)           | 0649 | Generalized myoclonic; generalized absence, typical                         | N/A        | N | Refractory |  |
| <i>GRIA3</i>   | c.1580C>A<br>p.Ser527Arg    | maternal       | hemi   | N/A         | VUS                          | 0855 | Generalized myoclonic (eye fluttering)                                      | Mild       |   | Refractory |  |
| <i>GRIN2A</i>  | c.1122+1G>C                 | unknown        | hetero | N/A         | LP (PVS1, PM2)               | 0490 | Nonmotor eyelid myoclonia                                                   | Borderline | N | Controlled |  |
| <i>GRIN2B</i>  | c.1843A>T<br>p.Asn615Tyr    | <i>de novo</i> | hetero | N/A         | P (PM2, PM5, PM1, PS2)       | 0796 | GES, generalized tonic, generalized myoclonic                               | Profound   | N | Refractory |  |
| <i>KCNA2</i>   | c.217C>T<br>p.Arg73Ter      | unknown        | hetero | N/A         | LP (PVS1, PM2)               | 0766 | GTCS                                                                        | N/A        | N | Refractory |  |
| <i>KCNMA1</i>  | c.1918C>T<br>p.Arg640Ter    | paternal       | hetero | N/A         | LP (PM2, PVS1)               | 0459 | GTCS, unknown motor tonic                                                   | Mild       | N | Refractory |  |
|                | c.3199A>G<br>p.Lys1067Glu   | <i>de novo</i> | hetero | N/A         | LP (PM2, PS2)                | 1004 | Generalized myoclonic                                                       | N/A        | N | Controlled |  |
| <i>KCNQ2</i>   | c.365C>T<br>p.Ser122Leu     | <i>de novo</i> | hetero | N/A         | P (PM2, PS1, PP1, PS2, PS3)  | 0781 | GTCS                                                                        | Severe     | Y | Controlled |  |
| <i>KCNQ3</i>   | c.688C>T<br>p.Arg230Cys     | <i>de novo</i> | hetero | N/A         | P (PM2, PS1, PP5, PS2)       | 0628 | FIA (motor) tonic (head, eye)                                               | Severe     | Y | Refractory |  |
| <i>KDM4B</i>   | c.719G>A<br>p.Arg240Gln     | <i>de novo</i> | hetero | N/A         | LP (PS2, PM2, PP3)           | 0479 | Generalized atonic (head drop), GTCS                                        | Moderate   | N | Refractory |  |
| <i>KDM6B</i>   | c.40C>G<br>p.Arg14Gly       | <i>de novo</i> | hetero | N/A         | VUS                          | 0914 | GTCS                                                                        | N/A        | N | Controlled |  |

|                |                                               |                    |        |            |                                  |      |                                                               |            |   |            |
|----------------|-----------------------------------------------|--------------------|--------|------------|----------------------------------|------|---------------------------------------------------------------|------------|---|------------|
| <i>KMT2E</i>   | c.1097_1116del20<br>p.Glu366ValfsTer4         | <i>de novo</i>     | hetero | N/A        | P (PM2, PVS1, PS2)               | 0774 | Generalized absence, typical                                  | Borderline | N | Refractory |
| <i>LGI1</i>    | c.757G>A<br>p.Ala253Thr                       | maternal           | hetero | 0.00001991 | VUS                              | 0463 | FIA (nonmotor) behavioral arrest                              | N/A        | N | Controlled |
| <i>MECP2</i>   | c.1200_1243del<br>p.Pro401Ter                 | <i>de novo</i>     | hetero | N/A        | P (PM2, PVS1, PS2_VS)            | 0452 | FIA (motor) hypermotor (nocturnal)                            | Severe     | N | Refractory |
| <i>MTR</i>     | c.2411T>C<br>p.Ile804Thr                      | paternal           | hetero | 0.00001194 | VUS                              | 0744 | GES                                                           | Moderate   | N | Controlled |
|                | c.2472A>T<br>p.Ala824=                        | maternal           | hetero | N/A        | VUS                              |      |                                                               |            |   |            |
| <i>NBEA</i>    | c.4702dup<br>p.Val1568GlyfsTer14              | <i>de novo</i>     | hetero | N/A        | P (PM2, PVS1, PS2)               | 0323 | GES, generalized tonic, generalized myoclonic                 | Severe     | N | Refractory |
| <i>NEXMIF</i>  | c.846_849delTGTC<br>p.V283tfsX20              | <i>de novo</i>     | mosaic | N/A        | P (PM2, PVS1, PS2)               | 0545 | Absence, GTC                                                  | Mild       | N | Refractory |
| <i>NPRL2</i>   | c.323_339+19del                               | paternal           | hetero | N/A        | P (PM2, PVS1, PP4)               | 0546 | Focal motor to bilateral tonic-clonic                         | Borderline | N | Refractory |
| <i>OTUD6B</i>  | c.433C>T<br>p.Arg145Ter                       | both               | homo   | 0.000169   | P (PVS1, PM3_S)                  | 0679 | GES, generalized myoclonic, generalized atonic (head drops)   | Severe     | N | Refractory |
| <i>PCDH19</i>  | c.811_825del<br>p.Gly271_Tyr275del            | <i>de novo</i>     | hetero | N/A        | LP (PM2, PM4, PS2, PP4)          | 0768 | Generalized atonic (drop)                                     | Moderate   | Y | Refractory |
|                | c.1335C>A<br>p.Asp445Glu                      | maternal           | hetero | N/A        | LP (PM1, PM2, PP2, PP3, PP5)     | 0720 | Febrile (6m), focal dyscognitive, GTC, tonic                  | Moderate   | Y | Refractory |
| <i>POLR2A</i>  | c.3281C>T<br>p.Ser1094Phe                     | <i>de novo</i>     | hetero | N/A        | LP (PS2_Moderate, PM2, PP3, PP2) | 0906 | GTCS                                                          | Mild       | Y | Controlled |
| <i>PGAP2</i>   | c.823A>G<br>p.Met275Val                       | unknown            | hetero | N/A        | LP (PM1, PM2, PP2, PP3)          | 0689 | Infantile spasms, GTC, focal, hemibody tonic                  | Profound   | N | Refractory |
|                | c.1040C>T<br>p.Ala347Val                      | maternal           | hetero | 0.00002    | LP (PM2, PM3, PP2, PP3)          |      |                                                               |            |   |            |
| <i>POLG</i>    | c.1760C>T/c.752C>T<br>p.Pro587Leu/p.Thr251Ile | maternal           | hetero | 0.00152    | P (PM2, PP2, PP3, PP5)           | 0790 | GTCS                                                          | N/A        | N | Controlled |
|                | c.1703G>C<br>p.Gly568Ala                      | paternal           | hetero | N/A        | VUS                              |      |                                                               |            |   |            |
| <i>PPP2R5D</i> | c.592G>A<br>p.Glu198Lys                       | unknown            | hetero | N/A        | P (PM2, PP3, PS3, PS2_VS)        | 0678 | Generalized myoclonic, generalized atonic (head drop)         | Severe     | N | Refractory |
| <i>PRRT2</i>   | c.870delT<br>p.Tyr290Ter                      | <i>de novo</i>     | hetero | N/A        | P (PM2, PVS1, PS2)               | 0700 | Focal motor clonic                                            | N/A        | N | Controlled |
|                | c.649dup<br>p.Arg217ProfsTer8                 | paternal           | hetero | 0.003103   | P (PM2, PVS1, PS3, PS2_VS)       | 0799 | FIA (nonmotor) behavioral arrest                              | N/A        | N | Controlled |
|                | c.649dup<br>p.Arg217ProfsTer8                 | maternal           | hetero | 0.003103   | P (PM2, PVS1, PS3, PS2_VS)       | 0987 | GTCS                                                          | N/A        | N | Controlled |
| <i>RORA</i>    | c.680del<br>p.Thr227ArgfsTer80                | <i>de novo</i>     | hetero | N/A        | P (PM2, PVS1, PS2)               | 0957 | FIA (motor) tonic to clonic                                   | Borderline | N | Refractory |
| <i>SCN1A</i>   | c.5066T>C<br>p.Met1689Thr                     | <i>de novo</i>     | hetero | N/A        | LP (PM2, PM5, PP2, PS2)          | 0498 | Focal to bilateral tonic-clonic; generalized absence, typical | Mild       | N | Controlled |
|                | c.5495C>A<br>p.Ala1832Glu                     | maternal<br>mosaic | hetero | N/A        | P (PM2, PM5, PM1, PS2)           | 0439 | GTCS, FIA (motor) tonic                                       | Severe     | Y | Refractory |

|                |                                             |                    |        |             |                             |      |                                                                                           |            |   |            |
|----------------|---------------------------------------------|--------------------|--------|-------------|-----------------------------|------|-------------------------------------------------------------------------------------------|------------|---|------------|
|                | c.3429G>C<br>p.Glu1143Asp                   | <i>de novo</i>     | hetero | N/A         | LP (PM2, PM5, PS2)          | 0824 | FA (motor) clonic, GTCS                                                                   | N/A        | N | Refractory |
|                | c.664C>T<br>p.Arg222Ter                     | maternal<br>mosaic | hetero | N/A         | P (PM2, PVS1, PS3, PS2)     | 0839 | FIA (nonmotor) behavioral arrest with<br>autonomic features, GTCS                         | Mild       | N | Refractory |
|                | c.4634T>G<br>p.Ile1545Arg                   | <i>de novo</i>     | hetero | N/A         | P (PM2, PS1, PS2)           | 0795 | GTCS, generalized myoclonic, generalized<br>atonic (drop)                                 | N/A        | N | Controlled |
|                | c.2955T>G<br>p.Asn985Lys                    | unknown            | hetero | N/A         | LP (PM2, PM5, PP3, PP2)     | 0806 | Focal motor to bilateral tonic-clonic                                                     | Borderline | N | Controlled |
|                | c.332T>A<br>p.Leu111Ter                     | <i>de novo</i>     | mosaic | N/A         | P (PM2, PVS1, PS2)          | 0755 | Focal                                                                                     | N/A        | N | Refractory |
|                | c.4057G>A<br>p.Val1353Ile                   | unknown            | hetero | N/A         | P (PM1, PM2, PM5, PP2, PP3) | 0846 | GTCS, generalized myoclonic                                                               | Severe     | N | Refractory |
|                | c.5606T>C<br>p.Phe1869Ser                   | maternal           | hetero | N/A         | VUS                         | 0926 | Generalized myoclonic                                                                     | N/A        | N | Refractory |
| <i>SCN1B</i>   | c.363C>G<br>p.Cys121Trp                     | maternal           | hetero | 0.00001414  | LP (PM2, PP3, PS3, PP1)     | 0969 | Focal motor to bilateral tonic-clonic                                                     | N/A        | N | Refractory |
|                | c.1A>C<br>p.Met1?                           | paternal           | hetero | N/A         | LP (PVS1, PM2)              | 1056 | Complex febrile                                                                           | N/A        |   | Refractory |
| <i>SCN8A</i>   | c.3955G>T<br>p.Ala1319Ser                   | <i>de novo</i>     | hetero | N/A         | P (PM2, PS1, PS2)           | 0417 | Generalized tonic clonic seizures, at times<br>with a prolonged tonic phase               | Moderate   | N | Refractory |
| <i>SETD1A</i>  | c.4268A>G<br>p.Gln1423Arg                   | <i>de novo</i>     | hetero | N/A         | LP (PS2, PM2, PP2, PP3)     | 0850 | FA (motor) tonic (mouth twitching)                                                        | Mild       | N | Refractory |
| <i>SETD1B</i>  | c.5726T>C<br>p.Ile1909Thr                   | <i>de novo</i>     | hetero | N/A         | LP (PM2, PP3, PS3, PS2)     | 0461 | Generalized absence, typical                                                              | Borderline | N | Refractory |
| <i>SHANK3</i>  | c.3949dupG<br>p.Val1317GlyfsX28             | <i>de novo</i>     | hetero | N/A         | P (PM2, PVS1, PS2)          | 0530 | GTCS                                                                                      | Profound   | N | Controlled |
| <i>SLC12A5</i> | c.1052A>G<br>p.Asn351Ser                    | both               | homo   | 0.000004023 | LP (PM2, PP3, PP2, PM3)     | 0476 | FIA (motor) tonic (eye) to FIA (nonmotor)<br>behavioral arrest                            | Moderate   | Y | Refractory |
| <i>SON</i>     | c.6888T>G<br>p.Asp2296Glu                   | <i>de novo</i>     | hetero | N/A         | LP (PS2, PM2, PP3, BP1)     | 0897 | GES, generalized tonic                                                                    | Mild       | N | Refractory |
| <i>SPATA5</i>  | c.2045C>T<br>p.Ala682Val                    | maternal           | hetero | N/A         | LP (PM2, PP3, PM3_S)        | 0500 | GES, generalized atonic (drop), generalized<br>tonic; GTCS; generalized absence, atypical | Severe     | N | Refractory |
|                | c.1883A>G<br>p.Asp628Gly                    | paternal           | hetero | 0.003581    | LP (PM2, PP3, PM3_S)        |      |                                                                                           |            |   |            |
| <i>SPTAN1</i>  | c.6589_6594dupGAGCT<br>p.Glu2197_Leu2198dup | <i>de novo</i>     | hetero | N/A         | P (PM2, PM4, PM1, PS2)      | 0647 | Generalized absence, typical with eyelid<br>myoclonia                                     | Mild       | N | Refractory |
| <i>SRCAP</i>   | c.8919del<br>p.Leu2975Ter                   | unknown            | hetero | N/A         | P (PVS1, PM2, PP5)          | 0488 | GTCS; generalized absence, typical                                                        | Mild       | N | Refractory |
| <i>STAG1</i>   | c.1145C>T<br>p.Thr382Ile                    | <i>de novo</i>     | hetero | N/A         | VUS                         | 0664 | Focal motor to bilateral tonic-clonic                                                     | N/A        | N | Refractory |
| <i>STXBP1</i>  | c.1652G>A<br>p.Arg551His                    | unknown            | hetero | N/A         | P (PM2, PM5, PS2_VS)        | 0663 | GES, GTCS                                                                                 | Moderate   | Y | Controlled |
|                | c.847G>A<br>p.Glu283Lys                     | unknown            | hetero | N/A         | P (PM2, PP3, PP2, PS2_VS)   | 0757 | Focal to bilateral tonic-clonic                                                           | Borderline | N | Controlled |

|         |                           |          |        |             |                         |      |                                                                                    |          |   |            |
|---------|---------------------------|----------|--------|-------------|-------------------------|------|------------------------------------------------------------------------------------|----------|---|------------|
| SYNGAP1 | c.403C>T<br>p.Arg135Ter   | de novo  | hetero | 0.000004816 | P (PM2, PVS1, PS2_VS)   | 0483 | Generalized absence, typical; generalized absence, atypical; generalized myoclonic | Moderate | Y | Refractory |
|         | c.1630C>T<br>p.Arg544Ter  | unknown  | hetero | N/A         | P (PM2, PVS1, PM6)      | 0738 | Generalized absence, typical; generalized myoclonic                                | Mild     | Y | Refractory |
| TANC2   | c.2326G>T<br>p.Glu776Ter  | de novo  | hetero | N/A         | P (PM2, PVS1, PS2)      | 0437 | GES, generalized tonic, generalized atonic (drop)                                  | Severe   | N | Refractory |
| TCF4    | c.1486+5delG              | de novo  | hetero | N/A         | LP (PM2, PS2, PP4)      | 0772 | GTCS                                                                               | Severe   | N | Refractory |
| TRIT1   | c.967C>T<br>p.Arg323Trp   | both     | homo   | 0.000009612 | LP (PM2, PS1)           | 0704 | Generalized myoclonic                                                              | Mild     | N | Controlled |
| UBA5    | c.829G>A<br>p.Gly277Ser   | paternal | hetero | N/A         | LP (PM2, PP3, PM3, PP4) | 0754 | Focal motor to bilateral tonic-clonic                                              | Profound | N | Refractory |
|         | c.1111G>A<br>p.Ala371Thr  | maternal | hetero | 0.00188     | P (PP3, PS3, PM3_S)     |      |                                                                                    |          |   |            |
| WDR26   | c.706C>G<br>p.Leu236Val   | unknown  | hetero | N/A         | VUS                     | 0858 | Focal                                                                              | Mild     | Y | Controlled |
| ZEB2    | c.3135C>G<br>p.His1045Gln | unknown  | hetero | N/A         | VUS                     | 0851 | Febrile GTC (2y), GTC                                                              | Moderate | N | Controlled |

ACMG/AMP, The American College of Medical Genetics (ACMG)/Association for Molecular Pathology; AF, allele frequency; N/A, not available; ID, intellectual disability; ASD, autism spectrum disorder; ASM, anti-seizure medication; N/A, not applicable; P, pathogenic; LP, likely pathogenic; PM, moderate evidence; PVS, very strong evidence; PP, supporting evidences; VUS, variant of uncertain significance; FIA, focal impaired awareness seizures; GTCS, generalized tonic-clonic seizure; GTC, generalized tonic seizure; GES, generalized epileptic spasm; Y, yes; N, none.

\* Refractoriness to ASM was associated with an increased likelihood of identifying a P/LP variant (OR 1.69 [95% CI 1.02 – 2.78], p = 0.04, two-sided).

## eTable 2. A Phenotype-Driven Epilepsy Gene List

Epilepsy genes in the list used in the study. 1,225 genes known to cause epilepsy or seizure phenotype are listed with RefSeq and outcomes. pLI, loss-of-function intolerant score; mis Z, missense Z score.

\*Curated haploinsufficiency refers to ClinGen (<https://www.clinicalgenome.org>) Gene Dosage Sensitivity.

†Variants in constrained epilepsy genes were considered (pLI >0.9 and/or Z score for missense variation >3.09, eTable 3).<sup>11</sup>

| Gene    | RefSeq         | Disease phenotype                                                                                                                                                                                                                 | Haplo-insufficiency* | pLI | Mis Z |
|---------|----------------|-----------------------------------------------------------------------------------------------------------------------------------------------------------------------------------------------------------------------------------|----------------------|-----|-------|
| AARS1   | NM_001605.3    | Developmental And Epileptic Encephalopathy 29                                                                                                                                                                                     | Unknown              | N/A | N/A   |
| AASS    | NM_005763.4    | Hyperlysinemia                                                                                                                                                                                                                    | Unknown              | 0.0 | 0.9   |
| ABAT    | NM_020686.6    | Gaba-Transaminase Deficiency                                                                                                                                                                                                      | Unknown              | 0.0 | 0.6   |
| ABCA5   | NM_172232.4    | Hypertrichosis, congenital generalized, with gingival hyperplasia, 135400 (3) mutation identified in 1 HTC3 patient                                                                                                               | Unknown              | 0.0 | 0.4   |
| ABCC8   | NM_000352.6    | Diabetes Mellitus, Transient Neonatal, 2; Diabetes Mellitus, Permanent Neonatal (PNDM); Hyperinsulinemic Hypoglycemia, Familial, 3 (HHF3); Hyperinsulinemic Hypoglycemia, Familial, 1 (HHF1); Hypoglycemia, Leucine-Induced (LIH) | No                   | 0.0 | 1.9   |
| ACADM   | NM_000016.6    | Acyl-Coa Dehydrogenase, Medium-Chain, Deficiency Of (ACADM)                                                                                                                                                                       | No                   | 0.0 | 0.5   |
| ACADS   | NM_000017.4    | Acyl-Coa Dehydrogenase, Short-Chain, Deficiency Of (ACADSD)                                                                                                                                                                       | Unknown              | 0.0 | 0.6   |
| ACADSB  | NM_001609.4    | 2-Methylbutyryl-Coa Dehydrogenase Deficiency                                                                                                                                                                                      | Unknown              | 0.0 | -0.1  |
| ACOX1   | NM_004035.7    | Peroxisomal Acyl-Coa Oxidase Deficiency                                                                                                                                                                                           | No                   | 0.1 | 2.0   |
| ACSF3   | NM_001243279.3 | Combined Malonic and Methylmalonic Aciduria (CMAMMA)                                                                                                                                                                              | No                   | 0.0 | -1.3  |
| ACSL4   | NM_001318510.2 | Intellectual Developmental Disorder, X-Linked 63 (MRX63); Amme Complex                                                                                                                                                            | Yes                  | 1.0 | 2.6   |
| ACTB    | NM_0011101.5   | Dystonia, Juvenile-Onset; Baraitser-Winter Syndrome 1 (BRWS1)                                                                                                                                                                     | Unknown              | 1.0 | 5.0   |
| ACTG1†  | NM_001614.5    | Baraitser-Winter Syndrome 2 (BRWS2); Deafness, Autosomal Dominant 20 (DFNA20); Baraitser-Winter Syndrome 2 (BRWS2); Deafness, Autosomal Dominant 20 (DFNA20)                                                                      | Unknown              | 0.0 | 3.2   |
| ACTL6B  | NM_016188.5    | Intellectual developmental disorder with severe speech and ambulation defects, 618470 (3); Epileptic encephalopathy, early infantile, 76, 618468 (3)                                                                              | Unknown              | 0.0 | 3.3   |
| ACY1    | NM_000666.3    | Aminoacylase 1 Deficiency                                                                                                                                                                                                         | Unknown              | 0.0 | 0.1   |
| ADAM22  | NM_001324418.2 | Epileptic encephalopathy, early infantile, 61, 617933 (3) mutation identified in 1 EIEE61 patient                                                                                                                                 | Unknown              | 0.3 | 2.3   |
| ADAR    | NM_0011111.5   | Aicardi-Goutieres Syndrome 6 (AGS6); Dyschromatosis Symmetrica Hereditaria (DSH)                                                                                                                                                  | Unknown              | 0.0 | 2.3   |
| ADAT3   | NM_138422.4    | Intellectual Developmental Disorder, Autosomal Recessive 36 (MRT36)                                                                                                                                                               | Unknown              | 0.0 | -0.4  |
| ADD3    | NM_016824.5    | Cerebral palsy, spastic quadriplegic, 3, 617008 (3) fusion with NUP98 in T-ALL                                                                                                                                                    | Unknown              | 1.0 | 0.3   |
| ADGRG1  | NM_201525.4    | Polymicrogyria, Bilateral Frontoparietal                                                                                                                                                                                          | No                   | N/A | N/A   |
| ADGRV1  | NM_032119.4    | Febrile Seizures, Familial, 4                                                                                                                                                                                                     | Unknown              | N/A | N/A   |
| ADK     | NM_006721.4    | Hypermethioninemia Due To Adenosine Kinase Deficiency                                                                                                                                                                             | Unknown              | 0.0 | 1.5   |
| ADNP†   | NM_001282531.3 | Helsmoortel-van der Aa syndrome, 615873 (3)                                                                                                                                                                                       | Yes                  | 1.0 | 2.1   |
| ADPRHL2 | NM_017825.3    | Neurodegeneration, childhood-onset, stress-induced, with variable ataxia and seizures, 618170 (3)                                                                                                                                 | Unknown              | 0.0 | 0.3   |
| ADRA2B† | NM_000682.7    | Epilepsy, myoclonic, familial adult, 2, 607876                                                                                                                                                                                    | Unknown              | 0.0 | 0.4   |
| ADSL    | NM_000026.4    | Adenylosuccinase Deficiency                                                                                                                                                                                                       | No                   | 0.0 | 0.8   |
| AFF3    | NM_001386135.1 | Intellectual disability;Seizures;KINSSHIP syndrome                                                                                                                                                                                | Unknown              | 1.0 | 1.7   |
| AFG3L2  | NM_006796.3    | Spastic Ataxia 5, Autosomal Recessive (SPAX5); Spinocerebellar Ataxia 28 (SCA28)                                                                                                                                                  | Unknown              | 0.0 | 2.0   |
| AGA     | NM_000027.4    | Aspartylglucosaminuria (AGU)                                                                                                                                                                                                      | Unknown              | 0.0 | -0.4  |
| AGMO    | NM_001004320.2 | microcephaly;intellectual disability;epilepsy                                                                                                                                                                                     | Unknown              | 0.0 | -2.6  |
| AGTR2   | NM_000686.5    | Intellectual Developmental Disorder, X-Linked 88 (MRX88)                                                                                                                                                                          | Unknown              | 0.0 | -0.1  |
| AHI1    | NM_001134831.2 | Joubert Syndrome 3 (JBTS3)                                                                                                                                                                                                        | No                   | 0.0 | 0.0   |
| AIFM1   | NM_004208.4    | Cowchock Syndrome (COWCK); Combined Oxidative Phosphorylation Deficiency 6 (COXPD6)                                                                                                                                               | Unknown              | 1.0 | 2.5   |
| AIMP1   | NM_001142416.2 | Leukodystrophy, Hypomyelinating, 3 (HLD3)                                                                                                                                                                                         | No                   | 0.0 | -0.2  |
| AIMP2   | NM_006303.4    | Leukodystrophy, hypomyelinating, 17, 618006 (3)                                                                                                                                                                                   | Unknown              | 0.0 | -0.8  |



|                  |                |                                                                                                                                                                                                                            |           |     |      |
|------------------|----------------|----------------------------------------------------------------------------------------------------------------------------------------------------------------------------------------------------------------------------|-----------|-----|------|
| <i>AKT1†</i>     | NM_001382430.1 | Cowden Syndrome 6 (CWS6); Proteus Syndrome; Colorectal Cancer (CRC); Breast Cancer                                                                                                                                         | Unknown   | 1.0 | 3.5  |
| <i>AKT2</i>      | NM_001626.6    | Hypoinsulinemic Hypoglycemia with Hemihypertrophy (HIHGHH); Diabetes Mellitus, Noninsulin-Dependent (NIDDM)                                                                                                                | Unknown   | 0.6 | 2.4  |
| <i>AKT3</i>      | NM_005465.7    | Megalencephaly-Polymicrogyria-Polydactyly-Hydrocephalus Syndrome                                                                                                                                                           | Uncertain | 1.0 | 3.9  |
| <i>ALDH18A1</i>  | NM_002860.4    | Cutis Laxa, Autosomal Recessive, Type Iiia (ARCL3A)                                                                                                                                                                        | Unknown   | 0.0 | 2.0  |
| <i>ALDH3A2</i>   | NM_000382.3    | Sjogren-Larsson Syndrome (SLS)                                                                                                                                                                                             | Unknown   | 0.0 | 0.7  |
| <i>ALDH4A1</i>   | NM_003748.4    | Hyperprolinemia, Type Ii (HPiI)                                                                                                                                                                                            | No        | 0.0 | 0.0  |
| <i>ALDH5A1</i>   | NM_001080.3    | Succinic Semialdehyde Dehydrogenase Deficiency (SSADHD)                                                                                                                                                                    | No        | 0.0 | 0.7  |
| <i>ALDH7A1</i>   | NM_001182.5    | Epilepsy, Pyridoxine-Dependent (EPD)                                                                                                                                                                                       | Unknown   | 0.0 | 0.4  |
| <i>ALDOB</i>     | NM_000035.4    | Fructose Intolerance, Hereditary                                                                                                                                                                                           | Unknown   | 0.0 | -1.4 |
| <i>ALG1</i>      | NM_019109.5    | Congenital Disorder of Glycosylation, Type Ii (CDG1K)                                                                                                                                                                      | Unknown   | 0.0 | -2.0 |
| <i>ALG11</i>     | NM_001004127.3 | Congenital Disorder of Glycosylation, Type Ip (CDG1P)                                                                                                                                                                      | Unknown   | 0.0 | 0.0  |
| <i>ALG13</i>     | NM_001099922.3 | Congenital Disorder of Glycosylation, Type Is (CDG1S)                                                                                                                                                                      | Unknown   | 1.0 | 1.1  |
| <i>ALG2</i>      | NM_033087.4    | Congenital Disorder of Glycosylation, Type Ii (CDG1I)                                                                                                                                                                      | Unknown   | 0.0 | -0.1 |
| <i>ALG3</i>      | NM_005787.6    | Congenital Disorder of Glycosylation, Type Id (CDG1D)                                                                                                                                                                      | Unknown   | 0.0 | -0.3 |
| <i>ALG6</i>      | NM_013339.4    | Congenital Disorder of Glycosylation, Type Ic (CDG1C)                                                                                                                                                                      | Unknown   | 0.0 | 1.5  |
| <i>ALG9</i>      | NM_024740.2    | Congenital Disorder of Glycosylation, Type II (CDG1L); Congenital Disorder Of Glycosylation, Type II (CDG1L); Congenital Disorder Of Glycosylation, Type II (CDG1L); Congenital Disorder Of Glycosylation, Type II (CDG1L) | Unknown   | 0.0 | 1.0  |
| <i>ALKBH8</i>    | NM_138775.3    | Intellectual developmental disorder, autosomal recessive 71, 618504 (3)                                                                                                                                                    | Unknown   | 0.0 | 0.9  |
| <i>ALMS1</i>     | NM_001378454.1 | Alstrom Syndrome (ALMS)                                                                                                                                                                                                    | No        | 0.0 | -3.0 |
| <i>ALPL</i>      | NM_000478.6    | Hypophosphatasia, Childhood; Hypophosphatasia, Infantile; Hypophosphatasia, Adult                                                                                                                                          | Unknown   | 0.0 | 1.3  |
| <i>ALX4†</i>     | NM_021926.4    | Frontonasal Dysplasia 2 (FND2); Parietal Foramina 2 (PFM2); Potocki-Shaffer Syndrome                                                                                                                                       | Yes       | 0.4 | 0.8  |
| <i>AMACR</i>     | NM_014324.6    | Alpha-Methylacyl-Coa Racemase Deficiency (AMACRD); Bile Acid Synthesis Defect, Congenital, 4 (CBAS4)                                                                                                                       | Unknown   | 0.0 | 0.6  |
| <i>AMER1</i>     | NM_152424.4    | Osteopathia Striata With Cranial Sclerosis (OSCS)                                                                                                                                                                          | Unknown   | 0.9 | -0.6 |
| <i>AMPD2</i>     | NM_001368809.2 | Spastic paraplegia 63, 615686 (3); Pontocerebellar hypoplasia, type 9, 615809 (3) mutation identified in 1 SPG63 family                                                                                                    | Unknown   | 0.0 | 2.8  |
| <i>AMT</i>       | NM_000481.4    | Glycine Encephalopathy (GCE)                                                                                                                                                                                               | Unknown   | 0.0 | -0.1 |
| <i>ANK3</i>      | NM_020987.5    | Intellectual Developmental Disorder, autosomal recessive, 37, 615493 (3)                                                                                                                                                   | Unknown   | 1.0 | 2.8  |
| <i>ANKH</i>      | NM_054027.6    | Craniovertebral Dysplasia, Autosomal Dominant (CMD); Chondrocalcinosis 2 (CCAL2)                                                                                                                                           | Unknown   | 0.3 | 2.3  |
| <i>ANKLE2</i>    | NM_015114.3    | Microcephaly 16, primary, autosomal recessive, 616681 (3)                                                                                                                                                                  | Unknown   | 0.0 | 0.3  |
| <i>ANKRD11†</i>  | NM_013275.6    | KBG Syndrome (KBGS)                                                                                                                                                                                                        | Yes       | 1.0 | -0.6 |
| <i>AP1S2</i>     | NM_001272071.2 | Intellectual Developmental Disorder, X-Linked, Syndromic, Fried Type (MRXS)                                                                                                                                                | Yes       | 0.9 | 2.0  |
| <i>AP2M1†</i>    | NM_004068.4    | Intellectual developmental disorder 60 with seizures, 618587 (3)                                                                                                                                                           | Unknown   | 1.0 | 4.9  |
| <i>AP3B2</i>     | NM_001278512.2 | Epileptic encephalopathy, early infantile, 48, 617276 (3)                                                                                                                                                                  | Unknown   | 0.8 | 2.9  |
| <i>AP4B1</i>     | NM_001253852.3 | Spastic Paraplegia 47, Autosomal Recessive (SPG47)                                                                                                                                                                         | No        | 0.0 | 0.1  |
| <i>AP4E1</i>     | NM_007347.5    | Spastic Paraplegia 51, Autosomal Recessive (SPG51)                                                                                                                                                                         | Unknown   | 0.0 | 0.5  |
| <i>AP4M1</i>     | NM_004722.4    | Spastic Paraplegia 50, Autosomal Recessive (SPG50)                                                                                                                                                                         | Unknown   | 0.0 | -1.2 |
| <i>AP4S1</i>     | NM_001128126.3 | Spastic Paraplegia 52, Autosomal Recessive (SPG52)                                                                                                                                                                         | No        | 0.0 | 0.0  |
| <i>APC2</i>      | NM_005883.3    | Sotos syndrome 3, 617169 (3); Cortical dysplasia, complex, with other brain malformations 10, 618677 (3) mutation identified in 1 SOTOS3 family                                                                            | Unknown   | 1.0 | 0.8  |
| <i>APP</i>       | NM_000484.4    | Cerebral amyloid angiopathy, Dutch, Italian, Iowa, Flemish, Arctic variants, 605714 (3); Alzheimer disease 1, familial, 104300 (3) proximal to SOD; very distal q21 or boundary with q22                                   | Unknown   | 0.0 | 1.4  |
| <i>AQP2</i>      | NM_000486.6    | Diabetes Insipidus, Nephrogenic, Autosomal                                                                                                                                                                                 | Unknown   | 0.0 | 1.1  |
| <i>ARFGF2</i>    | NM_006420.3    | Periventricular Heterotopia with Microcephaly, Autosomal Recessive                                                                                                                                                         | No        | 1.0 | 2.6  |
| <i>ARG1</i>      | NM_000045.4    | Argininemia                                                                                                                                                                                                                | No        | 0.0 | 0.1  |
| <i>ARHGAP31†</i> | NM_020754.4    | Adams-Oliver Syndrome 1 (AOS1)                                                                                                                                                                                             | Unknown   | 1.0 | 0.8  |
| <i>ARHGEF6</i>   | NM_004840.3    | Intellectual Developmental Disorder, X-Linked 46 (MRX46)                                                                                                                                                                   | Unknown   | 1.0 | 1.3  |

|                            |                |                                                                                                                                                                                                                                                                                                                                                                                                                                                      |           |     |      |
|----------------------------|----------------|------------------------------------------------------------------------------------------------------------------------------------------------------------------------------------------------------------------------------------------------------------------------------------------------------------------------------------------------------------------------------------------------------------------------------------------------------|-----------|-----|------|
| <i>ARHGEF9</i>             | NM_001353921.2 | Epileptic Encephalopathy, Early Infantile, 8 (EIEE8); Epileptic Encephalopathy, Early Infantile, 8 (EIEE8)                                                                                                                                                                                                                                                                                                                                           | Unknown   | 1.0 | 3.0  |
| <i>ARID1A</i> <sup>†</sup> | NM_006015.6    | Intellectual Developmental Disorder, Autosomal Dominant 14 (MRD14)                                                                                                                                                                                                                                                                                                                                                                                   | Yes       | 1.0 | 3.7  |
| <i>ARID1B</i> <sup>†</sup> | NM_001374828.1 | Intellectual Developmental Disorder, Autosomal Dominant 12 (MRD12)                                                                                                                                                                                                                                                                                                                                                                                   | Yes       | 1.0 | 2.6  |
| <i>ARL13B</i>              | NM_001174150.2 | Joubert Syndrome 8 (JBTS8)                                                                                                                                                                                                                                                                                                                                                                                                                           | Unknown   | 0.0 | -0.1 |
| <i>ARNT2</i>               | NM_014862.4    | Webb-Dattani syndrome, 615926 (3) mutation identified in 1 WEDAS family                                                                                                                                                                                                                                                                                                                                                                              | Unknown   | 1.0 | 2.0  |
| <i>ARSA</i>                | NM_000487.6    | Multiple Sulfatase Deficiency (MSD); Metachromatic Leukodystrophy                                                                                                                                                                                                                                                                                                                                                                                    | No        | 0.0 | 0.4  |
| <i>ARV1</i>                | NM_022786.3    | Epileptic encephalopathy, early infantile, 38, 617020 (3)                                                                                                                                                                                                                                                                                                                                                                                            | Unknown   | 0.0 | 0.2  |
| <i>ARX</i>                 | NM_139058.3    | Partington X-Linked Intellectual Developmental Disorder Syndrome (PRTS); Epileptic Encephalopathy, Early Infantile, 1 (EIEE1); Intellectual Developmental Disorder, X-Linked, With or Without Seizures, Arx-Related; Lissencephaly, X-Linked, 2 (LISX2); Corpus Callosum, Agenesis Of, With Abnormal Genitalia                                                                                                                                       | Yes       | 0.9 | 2.1  |
| <i>ASAH1</i>               | NM_177924.5    | Farber lipogranulomatosis, 228000 (3); Spinal muscular atrophy with progressive myoclonic epilepsy, 159950 (3)                                                                                                                                                                                                                                                                                                                                       | Unknown   | 0.0 | -2.2 |
| <i>ASCL1</i>               | NM_004316.4    | Central hypoventilation syndrome, congenital, 209880 (3); Haddad syndrome, 209880 (3) distal to PAH and proximal to TRA1                                                                                                                                                                                                                                                                                                                             | Unknown   | 0.7 | 1.6  |
| <i>ASL</i>                 | NM_000048.4    | Argininosuccinic Aciduria                                                                                                                                                                                                                                                                                                                                                                                                                            | Unknown   | 0.0 | 0.7  |
| <i>ASNS</i>                | NM_001673.5    | Asparagine synthetase deficiency, 615574 (3) temperature sensitive G1 mutant                                                                                                                                                                                                                                                                                                                                                                         | Unknown   | 0.0 | 1.9  |
| <i>ASPA</i>                | NM_000049.4    | Canavan Disease                                                                                                                                                                                                                                                                                                                                                                                                                                      | No        | 0.0 | 0.5  |
| <i>ASPM</i>                | NM_018136.5    | Microcephaly 5, Primary, Autosomal Recessive (MCPH5)                                                                                                                                                                                                                                                                                                                                                                                                 | No        | 0.0 | -0.7 |
| <i>ASS1</i>                | NM_054012.4    | Citrullinemia, Classic                                                                                                                                                                                                                                                                                                                                                                                                                               | Unknown   | 0.0 | 0.8  |
| <i>ASTN1</i>               | NM_004319.3    | Intellectual disability;epilepsy;cortical malformations                                                                                                                                                                                                                                                                                                                                                                                              | Unknown   | 1.0 | 1.7  |
| <i>ASXL1</i> <sup>†</sup>  | NM_015338.6    | Myelodysplastic Syndrome (MDS); Bohring-Opitz Syndrome (BOPS)                                                                                                                                                                                                                                                                                                                                                                                        | Yes       | 0.0 | 0.6  |
| <i>ATIC</i>                | NM_004044.7    | Aicar Transformylase/Imp Cyclohydrolase Deficiency                                                                                                                                                                                                                                                                                                                                                                                                   | Unknown   | 0.0 | -0.5 |
| <i>ATM</i>                 | NM_000051.4    | Ataxia-Telangiectasia (AT)                                                                                                                                                                                                                                                                                                                                                                                                                           | Yes       | 0.0 | 1.1  |
| <i>ATN1</i> <sup>†</sup>   | NM_001940.4    | Dentatorubral-Pallidoluysian Atrophy (DRPLA); Dentatorubral-Pallidoluysian Atrophy (DRPLA)                                                                                                                                                                                                                                                                                                                                                           | Unknown   | 1.0 | 1.8  |
| <i>ATP13A2</i>             | NM_022089.4    | Kufor-Rakeb Syndrome (KRS)                                                                                                                                                                                                                                                                                                                                                                                                                           | Unknown   | 0.0 | 1.4  |
| <i>ATP1A1</i> <sup>†</sup> | NM_000701.8    | Charcot-Marie-Tooth disease, axonal, type 2DD, 618036 (3); Hypomagnesemia, seizures, and Intellectual Developmental Disorder 2, 618314 (3)                                                                                                                                                                                                                                                                                                           | Unknown   | 1.0 | 6.2  |
| <i>ATP1A2</i> <sup>†</sup> | NM_000702.4    | Migraine, Familial Hemiplegic, 2 (FHM2); Alternating Hemiplegia of Childhood 1 (AHC1)                                                                                                                                                                                                                                                                                                                                                                | Unknown   | 0.0 | 4.8  |
| <i>ATP1A3</i> <sup>†</sup> | NM_152296.5    | Alternating Hemiplegia of Childhood 2 (AHC2); Dystonia 12 (DYT12); Alternating Hemiplegia of Childhood 2 (AHC2); Dystonia 12 (DYT12)                                                                                                                                                                                                                                                                                                                 | Unknown   | 1.0 | 6.3  |
| <i>ATP5F1A</i>             | NM_004046.6    | Combined Oxidative Phosphorylation Deficiency 22                                                                                                                                                                                                                                                                                                                                                                                                     | Unknown   | N/A | N/A  |
| <i>ATP6AP2</i>             | NM_005765.3    | Intellectual Developmental Disorder, X-Linked, Syndromic, Hedera Type (MRXSH)                                                                                                                                                                                                                                                                                                                                                                        | Unknown   | 0.9 | 1.7  |
| <i>ATP6VOA2</i>            | NM_012463.4    | Wrinkly Skin Syndrome (WSS); Cutis Laxa, Autosomal Recessive, Type Iia (ARCL2A)                                                                                                                                                                                                                                                                                                                                                                      | No        | 0.0 | 0.9  |
| <i>ATP6V1A</i>             | NM_001690.4    | Cutis laxa, autosomal recessive, type IID, 617403 (3); Epileptic encephalopathy, infantile or early childhood, 3, 618012 (3)                                                                                                                                                                                                                                                                                                                         | Unknown   | 0.9 | 3.4  |
| <i>ATP7A</i>               | NM_000052.7    | Menkes Disease; Occipital Horn Syndrome (OHS); Spinal Muscular Atrophy, Distal, X-Linked 3 (SMAX3); Menkes Disease; Occipital Horn Syndrome (OHS); Spinal Muscular Atrophy, Distal, X-Linked 3 (SMAX3)                                                                                                                                                                                                                                               | Yes       | 1.0 | 1.5  |
| <i>ATP8A2</i>              | NM_016529.6    | Cerebellar Ataxia, Intellectual Developmental Disorder, And Dysequilibrium Syndrome                                                                                                                                                                                                                                                                                                                                                                  | Uncertain | 0.0 | 2.3  |
| <i>ATR</i>                 | NM_001184.4    | Cutaneous Telangiectasia and Cancer Syndrome, Familial (FCTCS); Seckel Syndrome 1 (SCKL1)                                                                                                                                                                                                                                                                                                                                                            | Uncertain | 0.0 | 4.4  |
| <i>ATRX</i>                | NM_000489.6    | Intellectual Developmental Disorder -Hypotonic Facies Syndrome, X-Linked, 1 (MRXHF1); Alpha-Thalassemia/ Intellectual Developmental Disorder Syndrome, X-Linked (ATRX); Alpha-Thalassemia Myelodysplasia Syndrome (ATMDS); Intellectual Developmental Disorder -Hypotonic Facies Syndrome, X-Linked, 1 (MRXHF1); Alpha-Thalassemia/ Intellectual Developmental Disorder Syndrome, X-Linked (ATRX); Alpha-Thalassemia Myelodysplasia Syndrome (ATMDS) | Yes       | 1.0 | 3.1  |
| <i>ATXN10</i> <sup>†</sup> | NM_013236.4    | Spinocerebellar Ataxia 10 (SCA10)                                                                                                                                                                                                                                                                                                                                                                                                                    | Unknown   | 0.0 | -0.3 |
| <i>AUH</i>                 | NM_001698.3    | 3-Methylglutaconic Aciduria, Type I (MGCA1)                                                                                                                                                                                                                                                                                                                                                                                                          | Unknown   | 0.0 | 0.3  |
| <i>AUTS2</i> <sup>†</sup>  | NM_015570.4    | Intellectual Developmental Disorder, autosomal dominant 26, 615834 (3) translocation break at 7q11.2                                                                                                                                                                                                                                                                                                                                                 | Yes       | 1.0 | 2.2  |

|                            |                |                                                                                                                                                                                                                    |           |     |      |
|----------------------------|----------------|--------------------------------------------------------------------------------------------------------------------------------------------------------------------------------------------------------------------|-----------|-----|------|
| <i>AVPR2</i>               | NM_000054.6    | Diabetes Insipidus, Nephrogenic, X-Linked; Nephrogenic Syndrome of Inappropriate Antidiuresis (NSIAD); Diabetes Insipidus, Nephrogenic, X-Linked; Nephrogenic Syndrome of Inappropriate Antidiuresis (NSIAD)       | Yes       | 0.6 | 1.0  |
| <i>B3GALNT2</i>            | NM_152490.5    | Muscular Dystrophy-Dystroglycanopathy (Congenital with Brain and Eye                                                                                                                                               | Unknown   | 0.0 | 1.0  |
| <i>B3GALTL</i>             | NM_194318.4    | Peters-Plus Syndrome                                                                                                                                                                                               | Unknown   | 0.0 | 0.4  |
| <i>B4GAT1</i>              | NM_006876.3    | Muscular Dystrophy-Dystroglycanopathy (Congenital with Brain and Eye Anomalies), Type A, 13                                                                                                                        | Unknown   | N/A | N/A  |
| <i>B9D1</i>                | NM_015681.5    | Meckel Syndrome, Type 9 (MKS9)                                                                                                                                                                                     | No        | 0.0 | 0.1  |
| <i>BCAP31</i>              | NM_001256447.2 | Deafness, dystonia, and cerebral hypomyelination, 300475 (3)                                                                                                                                                       | Unknown   | 0.4 | 1.3  |
| <i>BCKDHA</i>              | NM_000709.4    | Maple Syrup Urine Disease (MSUD)                                                                                                                                                                                   | Unknown   | 0.0 | 0.7  |
| <i>BCKDHB</i>              | NM_183050.4    | Maple Syrup Urine Disease (MSUD)                                                                                                                                                                                   | Unknown   | 0.0 | -0.2 |
| <i>BCKDK</i>               | NM_005881.4    | Branched-Chain Ketoacid Dehydrogenase Kinase Deficiency (BCKDKD)                                                                                                                                                   | Unknown   | 0.0 | 1.6  |
| <i>BCL10</i>               | NM_003921.5    | Mesothelioma, Malignant (MESOM)                                                                                                                                                                                    | Unknown   | 0.3 | 1.4  |
| <i>BCL11A<sup>†</sup></i>  | NM_022893.4    | Fetal Hemoglobin Quantitative Trait Locus 5 (HBFQTL5)                                                                                                                                                              | Yes       | 1.0 | 3.8  |
| <i>BCOR</i>                | NM_001123385.2 | Microphthalmia, syndromic 2, 300166 (3)                                                                                                                                                                            | Yes       | 1.0 | 1.9  |
| <i>BCORL1</i>              | NM_001379451.1 | Shukla-Vernon syndrome, 301029 (3)                                                                                                                                                                                 | Unknown   | 1.0 | 2.1  |
| <i>BCS1L</i>               | NM_001079866.2 | Gracile Syndrome; Bjornstad Syndrome (BJS); Mitochondrial Complex Iii Deficiency, Nuclear Type 1 (MC3DN1)                                                                                                          | No        | 0.0 | 1.6  |
| <i>BMP4</i>                | NM_001202.6    | Microphthalmia, Syndromic 6 (MCOPS6); Orofacial Cleft 11 (OFC11)                                                                                                                                                   | Unknown   | 1.0 | 1.0  |
| <i>BOLA3</i>               | NM_212552.3    | Multiple Mitochondrial Dysfunctions Syndrome 2 (MMDS2)                                                                                                                                                             | Unknown   | 0.1 | 0.5  |
| <i>BRAF<sup>†</sup></i>    | NM_001374258.1 | Leopard Syndrome 3; Noonan Syndrome 7 (NS7); Lymphoma, Non-Hodgkin, Familial; Lung Cancer; Cardiofaciocutaneous Syndrome 1 (CFC1); Colorectal Cancer (CRC)                                                         | Uncertain | 1.0 | 3.7  |
| <i>BRAT1</i>               | NM_152743.4    | Rigidity And Multifocal Seizure Syndrome, Lethal Neonatal (RMFSL)                                                                                                                                                  | No        | 0.0 | -0.6 |
| <i>BRWD3</i>               | NM_153252.5    | Intellectual Developmental Disorder, X-Linked 93 (MRX93)                                                                                                                                                           | Unknown   | 1.0 | 4.3  |
| <i>BSCL2</i>               | NM_001122955.4 | Neuronopathy, Distal Hereditary Motor, Type Va (HMN5A); Spastic Paraplegia 17, Autosomal Dominant (SPG17); Lipodystrophy, Congenital Generalized, Type 2 (CGL2)                                                    | Unknown   | 0.0 | 0.3  |
| <i>BTD</i>                 | NM_001370658.1 | Biotinidase Deficiency                                                                                                                                                                                             | No        | 0.0 | -0.5 |
| <i>BUB1B</i>               | NM_001211.6    | Mosaic Variegated Aneuploidy Syndrome 1 (MVA1); Premature Chromatid Separation Trait (PCS)                                                                                                                         | Unknown   | 0.0 | 0.9  |
| <i>C10orf2</i>             | NM_001031344.1 | Progressive External Ophthalmoplegia With Mitochondrial DNA Deletions,; Sensory Ataxic Neuropathy, Dysarthria, And Ophthalmoparesis (SANDO); Mitochondrial DNA Depletion Syndrome 7 (Hepatocerebral Type) (MTDPS7) | Unknown   | 0.0 | 1.6  |
| <i>C12orf57</i>            | NM_138425.4    | Temtamy Syndrome (TEMTYS); Temtamy Syndrome (TEMTYS)                                                                                                                                                               | Unknown   | 0.0 | -0.9 |
| <i>C12orf65</i>            | NM_152269.5    | Spastic Paraplegia 55, Autosomal Recessive (SPG55); Combined Oxidative Phosphorylation Deficiency 7 (COXPD7)                                                                                                       | Unknown   | 0.2 | -0.4 |
| <i>C5orf42</i>             | NM_001384732.1 | Joubert Syndrome 17 (JBTS17)                                                                                                                                                                                       | No        | 0.0 | 1.9  |
| <i>C9orf72</i>             | NM_018325.5    | Frontotemporal Dementia And/Or Amyotrophic Lateral Sclerosis (FTDALS)                                                                                                                                              | Unknown   | 0.0 | 0.2  |
| <i>CA8</i>                 | NM_004056.6    | Cerebellar ataxia and Intellectual Developmental Disorder with or without quadrupedal locomotion 3, 613227 (3)                                                                                                     | No        | 0.0 | 1.2  |
| <i>CACNA1A<sup>†</sup></i> | NM_001127222.2 | Spinocerebellar Ataxia 6 (SCA6); Migraine, Familial Hemiplegic, 1 (FHM1); Episodic Ataxia, Type 2 (EA2)                                                                                                            | Yes       | 1.0 | 5.8  |
| <i>CACNA1B<sup>†</sup></i> | NM_000718.4    | Neurodevelopmental disorder with seizures and nonepileptic hyperkinetic movements, 618497 (3)                                                                                                                      | Unknown   | 1.0 | 4.5  |
| <i>CACNA1D</i>             | NM_001128840.3 | Sinoatrial node dysfunction and deafness, 614896 (3); Primary aldosteronism, seizures, and neurologic abnormalities, 615474 (3)                                                                                    | Unknown   | 1.0 | 4.6  |
| <i>CACNA1E<sup>†</sup></i> | NM_001205293.3 | Epileptic encephalopathy, early infantile, 69, 618285 (3)                                                                                                                                                          | Unknown   | 1.0 | 5.8  |
| <i>CACNA1G<sup>†</sup></i> | NM_018896.5    | Spinocerebellar ataxia 42, 616795 (3); Spinocerebellar ataxia 42, early-onset, severe, with neurodevelopmental deficits, 618087 (3)                                                                                | Unknown   | 1.0 | 4.6  |
| <i>CACNA2D2</i>            | NM_006030.4    | Cerebellar atrophy with seizures and variable developmental delay, 618501 (3)                                                                                                                                      | Unknown   | 1.0 | 3.0  |
| <i>CACNB4<sup>†</sup></i>  | NM_000726.5    | Episodic Ataxia, Type 5 (EA5); Epilepsy, Idiopathic Generalized, Susceptibility To, 9 (EIG9)                                                                                                                       | Unknown   | 0.0 | 2.7  |
| <i>CACNG2<sup>†</sup></i>  | NM_006078.5    | Intellectual Developmental Disorder, Autosomal Dominant 10 (MRD10)                                                                                                                                                 | Unknown   | 0.9 | 2.1  |
| <i>CAD</i>                 | NM_004341.5    | Epileptic encephalopathy, early infantile, 50, 616457 (3)                                                                                                                                                          | Unknown   | 1.0 | 4.3  |
| <i>CALM1</i>               | NM_006888.6    | Ventricular Tachycardia, Catecholaminergic Polymorphic, 4 (CPVT4)                                                                                                                                                  | Unknown   | 0.9 | 3.1  |
| <i>CALM2</i>               | NM_001743.6    | Ventricular Tachycardia, Catecholaminergic Polymorphic, 4 (CPVT4)                                                                                                                                                  | Unknown   | 0.9 | 2.8  |

|                |                |                                                                                                                                                                                                                                                 |           |     |      |
|----------------|----------------|-------------------------------------------------------------------------------------------------------------------------------------------------------------------------------------------------------------------------------------------------|-----------|-----|------|
| <i>CALM3</i>   | NM_005184.4    | Ventricular Tachycardia, Catecholaminergic Polymorphic, 4 (CPVT4)                                                                                                                                                                               | Unknown   | 0.9 | 3.0  |
| <i>CAMK2A</i>  | NM_015981.4    | Intellectual Developmental Disorder, autosomal dominant 53, 617798 (3); Intellectual Developmental Disorder, autosomal recessive 63, 618095 (3) mutation identified in 1 MRT63 family                                                           | Uncertain | 1.0 | 4.7  |
| <i>CAMK2B†</i> | NM_001220.5    | Intellectual Developmental Disorder, autosomal dominant 54, 617799 (3)                                                                                                                                                                          | Unknown   | 0.7 | 4.1  |
| <i>CARS2</i>   | NM_024537.4    | Combined oxidative phosphorylation deficiency 27, 616672 (3)                                                                                                                                                                                    | Unknown   | 0.0 | 0.2  |
| <i>CASK</i>    | NM_001367721.1 | Intellectual Developmental Disorder and Microcephaly with Pontine and Cerebellar Hypoplasia; Fg Syndrome 4 (FGS4)                                                                                                                               | Yes       | 1.0 | 4.3  |
| <i>CASQ2</i>   | NM_001232.4    | Ventricular Tachycardia, Catecholaminergic Polymorphic, 2 (CPVT2)                                                                                                                                                                               | Unknown   | 0.0 | -0.2 |
| <i>CASR</i>    | NM_000388.4    | Epilepsy, Idiopathic Generalized, Susceptibility To, 8 (EIG8); Calcium-Sensing Receptor (CASR); Hypocalcemia, Autosomal Dominant 1 (HYPOC1); Hyperparathyroidism, Neonatal Severe (NSHPT); Hypocalciuric Hypercalcemia, Familial, Type I (HHC1) | Unknown   | 0.0 | 3.1  |
| <i>CBS</i>     | NM_000071.3    | Homocystinuria Due to Cystathionine Beta-Synthase Deficiency                                                                                                                                                                                    | No        | 0.0 | 0.8  |
| <i>CC2D1A</i>  | NM_017721.5    | Intellectual Developmental Disorder, Autosomal Recessive 3 (MRT3)                                                                                                                                                                               | Unknown   | 0.0 | 0.9  |
| <i>CC2D2A</i>  | NM_001378615.1 | Joubert Syndrome 9 (JBTS9); Meckel Syndrome, Type 6 (MKS6); Coach Syndrome                                                                                                                                                                      | No        | 0.0 | 0.6  |
| <i>CCBE1</i>   | NM_133459.4    | Hennekam Lymphangiectasia-Lymphedema Syndrome                                                                                                                                                                                                   | Unknown   | 0.0 | -0.7 |
| <i>CCDC88A</i> | NM_001365480.1 | PEHO syndrome-like, 617507 (3) mutation identified in 1 PEHOL family                                                                                                                                                                            | Unknown   | 1.0 | 2.3  |
| <i>CCDC88C</i> | NM_001080414.4 | Hydrocephalus, Nonsyndromic, Autosomal Recessive 1 (HYC1)                                                                                                                                                                                       | Unknown   | 0.0 | 0.7  |
| <i>CCM2†</i>   | NM_031443.4    | Cerebral Cavemous Malformations 2 (CCM2)                                                                                                                                                                                                        | Unknown   | 0.0 | 0.5  |
| <i>CCND2</i>   | NM_001759.4    | Megalencephaly-polymicrogyria-polydactyly-hydrocephalus syndrome 3, 615938 (3)                                                                                                                                                                  | Unknown   | 1.0 | 2.1  |
| <i>CD96</i>    | NM_005816.5    | C Syndrome                                                                                                                                                                                                                                      | Unknown   | 0.0 | -0.5 |
| <i>CDC42</i>   | NM_001791.4    | Takenouchi-Kosaki syndrome, 616737 (3)                                                                                                                                                                                                          | Unknown   | 0.8 | 3.0  |
| <i>CDH15†</i>  | NM_004933.3    | Intellectual Developmental Disorder, Autosomal Dominant 3 (MRD3)                                                                                                                                                                                | Unknown   | 0.0 | -1.0 |
| <i>CDKL5</i>   | NM_001323289.2 | Epileptic Encephalopathy, Early Infantile, 2 (EIEE2)                                                                                                                                                                                            | Yes       | 1.0 | 2.7  |
| <i>CDON†</i>   | NM_001378964.1 | Holoprosencephaly 11 (HPE11)                                                                                                                                                                                                                    | Unknown   | 0.0 | 0.2  |
| <i>CECR1</i>   | NM_001282225.2 | Vasculitis, autoinflammation, immunodeficiency, and hematologic defects syndrome, 615688 (3); Sneddon syndrome, 182410 (3) mutation identified in 1 SNEDS family                                                                                | Unknown   | 0.0 | 0.4  |
| <i>CENPE</i>   | NM_001813.3    | Microcephaly 13, primary, autosomal recessive, 616051 (3) mutation identified in 1 MCPH13 family                                                                                                                                                | Unknown   | 0.2 | 1.3  |
| <i>CENPJ</i>   | NM_018451.5    | Seckel Syndrome 4 (SCKL4); Microcephaly 6, Primary, Autosomal Recessive (MCPH6)                                                                                                                                                                 | Unknown   | 0.0 | 0.2  |
| <i>CEP104</i>  | NM_014704.4    | Joubert syndrome 25, 616781 (3)                                                                                                                                                                                                                 | Unknown   | 0.0 | 0.4  |
| <i>CEP120</i>  | NM_001375405.1 | Short-rib thoracic dysplasia 13 with or without polydactyly, 616300 (3); Joubert syndrome 31, 617761 (3)                                                                                                                                        | Unknown   | 0.0 | -0.2 |
| <i>CEP152</i>  | NM_001194998.2 | Microcephaly 9, Primary, Autosomal Recessive (MCPH9); Seckel Syndrome 5 (SCKL5)                                                                                                                                                                 | Unknown   | 0.0 | 0.0  |
| <i>CEP290</i>  | NM_025114.4    | Leber Congenital Amaurosis 10 (LCA10); Meckel Syndrome, Type 4 (MKS4); Senior-Loken Syndrome 6 (SLSN6); Joubert Syndrome 5 (JBTS5); Bardet-Biedl Syndrome (BBS)                                                                                 | No        | 0.0 | 0.5  |
| <i>CEP41</i>   | NM_018718.3    | Joubert Syndrome 15 (JBTS15); Joubert Syndrome 15 (JBTS15)                                                                                                                                                                                      | Unknown   | 0.0 | 0.3  |
| <i>CEP57</i>   | NM_014679.5    | Mosaic Variegated Aneuploidy Syndrome 2 (MVA2)                                                                                                                                                                                                  | Unknown   | 0.1 | -0.5 |
| <i>CERS1</i>   | NM_021267.5    | Epilepsy, progressive myoclonic, 8, 616230 (3) mutation identified in 1 EPM8 family                                                                                                                                                             | Unknown   | 0.1 | 0.8  |
| <i>CERT1</i>   | NM_001379029.1 | Intellectual Developmental Disorder, Autosomal Dominant 34                                                                                                                                                                                      | Unknown   | N/A | N/A  |
| <i>CHAMP1†</i> | NM_032436.4    | Intellectual Developmental Disorder, autosomal dominant 40, 616579 (3)                                                                                                                                                                          | Unknown   | 1.0 | 0.1  |
| <i>CHD1†</i>   | NM_001270.4    | Pilarowski-Bjornsson syndrome, 617682 (3)                                                                                                                                                                                                       | Unknown   | 1.0 | 4.2  |
| <i>CHD2†</i>   | NM_001271.4    | Epileptic encephalopathy, childhood-onset, 615369 (3)                                                                                                                                                                                           | Yes       | 1.0 | 5.2  |
| <i>CHD7</i>    | NM_017780.4    | Hypogonadotropic Hypogonadism 5 with or without Anosmia (HH5); Scoliosis, Idiopathic, Susceptibility To, 3 (IS3); Charge Syndrome                                                                                                               | Yes       | 1.0 | 3.2  |
| <i>CHD8†</i>   | NM_001170629.2 | Autism, Susceptibility To, 18 (AUTS18)                                                                                                                                                                                                          | Yes       | 1.0 | 5.9  |
| <i>CHKB</i>    | NM_005198.5    | Muscular dystrophy, congenital, megaconial type, 602541 (3)                                                                                                                                                                                     | No        | 0.0 | -0.5 |
| <i>CHRNA2†</i> | NM_000742.4    | Epilepsy, Nocturnal Frontal Lobe, 4 (ENFL4)                                                                                                                                                                                                     | Unknown   | 0.0 | -0.3 |
| <i>CHRNA4†</i> | NM_000744.7    | Epilepsy, Nocturnal Frontal Lobe, 1 (ENFL1)                                                                                                                                                                                                     | Unknown   | 0.0 | 0.3  |
| <i>CHRN2†</i>  | NM_000748.3    | Epilepsy, Nocturnal Frontal Lobe, 3 (ENFL3)                                                                                                                                                                                                     | Unknown   | 0.0 | 2.1  |
| <i>CIC†</i>    | NM_001386298.1 | Intellectual Developmental Disorder, autosomal dominant 45, 617600 (3)                                                                                                                                                                          | Unknown   | 1.0 | 0.7  |

|                |                |                                                                                                                                                                                                                                                                                                                                                                                            |           |     |      |
|----------------|----------------|--------------------------------------------------------------------------------------------------------------------------------------------------------------------------------------------------------------------------------------------------------------------------------------------------------------------------------------------------------------------------------------------|-----------|-----|------|
| <i>CISD2</i>   | NM_001008388.5 | Wolfram Syndrome 2 (WFS2)                                                                                                                                                                                                                                                                                                                                                                  | Unknown   | 0.4 | 1.3  |
| <i>CKAP2L</i>  | NM_152515.5    | Filippi syndrome, 272440 (3)                                                                                                                                                                                                                                                                                                                                                               | Unknown   | 0.0 | -0.1 |
| <i>CLCF1</i>   | NM_013246.3    | Cold-Induced Sweating Syndrome 2 (CISS2)                                                                                                                                                                                                                                                                                                                                                   | Unknown   | 0.9 | 1.1  |
| <i>CLCN1</i>   | NM_000083.3    | Myotonia Congenita, Autosomal Recessive; Myotonia Congenita, Autosomal Dominant                                                                                                                                                                                                                                                                                                            | Unknown   | 0.0 | 0.2  |
| <i>CLCN2†</i>  | NM_004366.6    | Epilepsy, juvenile myoclonic, susceptibility to, 8, 607628 (3); Epilepsy, juvenile absence, susceptibility to, 2, 607628 (3); Epilepsy, idiopathic generalized, susceptibility to, 11, 607628 (3); Leukoencephalopathy with ataxia, 615651 (3); Hyperaldosteronism, familial, type II, 605635 (3)                                                                                          | Unknown   | 0.0 | 0.7  |
| <i>CLCN4</i>   | NM_001830.4    | Raynaud-Claes syndrome, 300114 (3)                                                                                                                                                                                                                                                                                                                                                         | Unknown   | 1.0 | 4.5  |
| <i>CLDN16</i>  | NM_006580.4    | Hypomagnesemia 3, Renal (HOMG3)                                                                                                                                                                                                                                                                                                                                                            | Unknown   | 0.0 | -0.1 |
| <i>CLECT7A</i> | NM_197947.3    | Aspergillosis, Susceptibility To; Candidiasis, Familial, 4 (CANDF4)                                                                                                                                                                                                                                                                                                                        | Unknown   | 0.0 | 0.1  |
| <i>CLIC2</i>   | NM_001289.6    | Intellectual Developmental Disorder, X-Linked, Syndromic 32 (MRXS32); Intellectual Developmental Disorder, X-Linked, Syndromic 32 (MRXS32)                                                                                                                                                                                                                                                 | Unknown   | 0.0 | 1.3  |
| <i>CLN3</i>    | NM_001042432.2 | Ceroid Lipofuscinosis, Neuronal, 3 (CLN3)                                                                                                                                                                                                                                                                                                                                                  | Unknown   | 0.0 | -0.1 |
| <i>CLN5</i>    | NM_006493.4    | Ceroid Lipofuscinosis, Neuronal, 5 (CLN5)                                                                                                                                                                                                                                                                                                                                                  | Unknown   | 0.0 | -0.1 |
| <i>CLN6</i>    | NM_017882.3    | Ceroid Lipofuscinosis, Neuronal, 6 (CLN6); Ceroid Lipofuscinosis, Neuronal, 4A, Autosomal Recessive (CLN4A)                                                                                                                                                                                                                                                                                | Unknown   | 0.0 | 0.0  |
| <i>CLN8</i>    | NM_018941.4    | Ceroid Lipofuscinosis, Neuronal, 8, Northern Epilepsy Variant; Ceroid Lipofuscinosis, Neuronal, 8 (CLN8)                                                                                                                                                                                                                                                                                   | Unknown   | 0.0 | -0.8 |
| <i>CLP1</i>    | NM_006831.3    | Pontocerebellar hypoplasia, type 10, 615803 (3)                                                                                                                                                                                                                                                                                                                                            | Unknown   | 0.2 | 2.3  |
| <i>CLPB</i>    | NM_001258392.3 | 3-methylglutaconic aciduria, type VII, with cataracts, neurologic involvement and neutropenia, 616271 (3)                                                                                                                                                                                                                                                                                  | Unknown   | 0.0 | 1.1  |
| <i>CLPP</i>    | NM_006012.4    | Perrault Syndrome 3 (PRLTS3)                                                                                                                                                                                                                                                                                                                                                               | No        | 0.6 | 1.9  |
| <i>CLTC†</i>   | NM_004859.4    | Intellectual Developmental Disorder, autosomal dominant 56, 617854 (3) fusion gene with TFE3 in renal adenocarcinoma                                                                                                                                                                                                                                                                       | Unknown   | 1.0 | 7.8  |
| <i>CNKSR2</i>  | NM_014927.5    | Intellectual Developmental Disorder, X-linked, syndromic, Houge type, 301008 (3) conflicting assignment to chr.1                                                                                                                                                                                                                                                                           | Unknown   | 1.0 | 3.6  |
| <i>CNNM2</i>   | NM_017649.5    | Hypomagnesemia 6, Renal (HOMG6)                                                                                                                                                                                                                                                                                                                                                            | Unknown   | 1.0 | 4.4  |
| <i>CNPY3</i>   | NM_006586.5    | Epileptic encephalopathy, early infantile, 60, 617929 (3)                                                                                                                                                                                                                                                                                                                                  | Unknown   | 0.4 | 0.4  |
| <i>CNTN2</i>   | NM_005076.5    | Epilepsy, myoclonic, familial adult, 5, 615400 (3) 1 family identified with mutation                                                                                                                                                                                                                                                                                                       | No        | 0.0 | 2.6  |
| <i>CNTNAP2</i> | NM_014141.6    | Autism, Susceptibility To, 15 (AUTS15); Cortical Dysplasia-Focal Epilepsy Syndrome                                                                                                                                                                                                                                                                                                         | Uncertain | 0.0 | -0.3 |
| <i>COA8</i>    | NM_001370595.2 | Mitochondrial Complex Iv Deficiency, Nuclear Type 17                                                                                                                                                                                                                                                                                                                                       | Unknown   | N/A | N/A  |
| <i>COG2</i>    | NM_007357.3    | Congenital disorder of glycosylation, type IIq, 617395 (3) mutation identified in 1 CDG2Q patient                                                                                                                                                                                                                                                                                          | Unknown   | 0.0 | 0.9  |
| <i>COG4</i>    | NM_015386.3    | Congenital Disorder of Glycosylation, Type Iij (CDG2J)                                                                                                                                                                                                                                                                                                                                     | Unknown   | 0.0 | -0.3 |
| <i>COG5</i>    | NM_006348.5    | Congenital Disorder of Glycosylation, Type Iii (CDG2I)                                                                                                                                                                                                                                                                                                                                     | Unknown   | 0.0 | -0.5 |
| <i>COG6</i>    | NM_020751.3    | Shaheen Syndrome (SHNS); Congenital Disorder of Glycosylation, Type Iil (CDG2L)                                                                                                                                                                                                                                                                                                            | Unknown   | 0.0 | -0.2 |
| <i>COG7</i>    | NM_153603.4    | Congenital Disorder of Glycosylation, Type Iie (CDG2E)                                                                                                                                                                                                                                                                                                                                     | No        | 0.0 | 0.8  |
| <i>COG8</i>    | NM_032382.5    | Congenital Disorder of Glycosylation, Type Iih (CDG2H)                                                                                                                                                                                                                                                                                                                                     | No        | 0.0 | -0.1 |
| <i>COL18A1</i> | NM_001379500.1 | Knobloch Syndrome 1 (KNO1)                                                                                                                                                                                                                                                                                                                                                                 | Unknown   | 0.0 | -0.8 |
| <i>COL4A1†</i> | NM_001845.6    | Brain small vessel disease with or without ocular anomalies, 175780 (3); Angiopathy, hereditary, with nephropathy, aneurysms, and muscle cramps, 611773 (3); Hemorrhage, intracerebral, susceptibility to, 614519 (3); Retinal arteries, tortuosity of, 180000 (3); Microangiopathy and leukoencephalopathy, pontine, autosomal dominant, 618564 (3) mutation identified in 1 RATOR family | Unknown   | 1.0 | 3.0  |
| <i>COL4A2†</i> | NM_001846.4    | Hemorrhage, Intracerebral, Susceptibility To (ICH); Porencephaly 2 (POREN2)                                                                                                                                                                                                                                                                                                                | Unknown   | 0.0 | 2.2  |
| <i>COMT†</i>   | NM_000754.4    | Catechol-O-Methyltransferase (COMT); Alcohol Dependence                                                                                                                                                                                                                                                                                                                                    | Unknown   | 0.0 | 0.4  |
| <i>COQ2</i>    | NM_001358921.2 | Coenzyme Q10 Deficiency, Primary, 1 (COQ10D1)                                                                                                                                                                                                                                                                                                                                              | No        | 0.0 | 0.0  |
| <i>COQ4</i>    | NM_016035.5    | Coenzyme Q10 deficiency, primary, 7, 616276 (3)                                                                                                                                                                                                                                                                                                                                            | Unknown   | 0.0 | 0.4  |
| <i>COQ6</i>    | NM_182476.3    | Coenzyme Q10 Deficiency, Primary, 6 (COQ10D6)                                                                                                                                                                                                                                                                                                                                              | Unknown   | 0.0 | 0.6  |
| <i>COQ8A</i>   | NM_020247.5    | Coenzyme Q10 Deficiency, Primary, 4                                                                                                                                                                                                                                                                                                                                                        | Unknown   | N/A | N/A  |
| <i>COQ9</i>    | NM_020312.4    | Coenzyme Q10 Deficiency, Primary, 5 (COQ10D5)                                                                                                                                                                                                                                                                                                                                              | Unknown   | 0.0 | -0.2 |
| <i>COX10</i>   | NM_001303.4    | Leigh Syndrome (LS); Mitochondrial Complex Iv Deficiency                                                                                                                                                                                                                                                                                                                                   | Unknown   | 0.1 | -0.2 |

|          |                |                                                                                                                                                                                                                                                          |         |     |      |
|----------|----------------|----------------------------------------------------------------------------------------------------------------------------------------------------------------------------------------------------------------------------------------------------------|---------|-----|------|
| COX15    | NM_078470.6    | Cardioencephalomyopathy, Fatal Infantile, Due to Cytochrome C Oxidase; Leigh Syndrome (LS)                                                                                                                                                               | No      | 0.0 | 0.3  |
| COX7B    | NM_001866.3    | Aplasia Cutis Congenita, Reticulolinear, With Microcephaly, Facial; Aplasia Cutis Congenita, Reticulolinear, With Microcephaly, Facial                                                                                                                   | Unknown | 0.7 | 0.4  |
| COX8A    | NM_004074.3    | Mitochondrial complex IV deficiency, nuclear type 15                                                                                                                                                                                                     | Unknown | 0.1 | 0.2  |
| CPA6     | NM_020361.5    | Febrile Seizures, Familial, 11 (44238); Epilepsy, Familial Temporal Lobe, 5 (ETL5)                                                                                                                                                                       | Unknown | 0.0 | -0.5 |
| CPLX1    | NM_006651.4    | Epileptic encephalopathy, early infantile, 63, 617976 (3)                                                                                                                                                                                                | Unknown | 0.8 | -0.4 |
| CPOX     | NM_000097.7    | Coproporphyrinuria, Hereditary (HCP)                                                                                                                                                                                                                     | Unknown | 0.2 | 1.3  |
| CPS1     | NM_001875.5    | Carbamoylphosphate synthetase I deficiency, 237300 (3); Pulmonary hypertension, neonatal, susceptibility to, 615371 (3) urea cycle enzyme                                                                                                                | Unknown | 0.0 | 1.5  |
| CPT1A    | NM_001876.4    | Carnitine Palmitoyltransferase I Deficiency                                                                                                                                                                                                              | No      | 0.0 | 1.6  |
| CPT2     | NM_000098.3    | Encephalopathy, Acute, Infection-Induced, Susceptibility To, 4 (IIAE4); Carnitine Palmitoyltransferase II Deficiency, Lethal Neonatal; Carnitine Palmitoyltransferase II Deficiency, Infantile; Carnitine Palmitoyltransferase II Deficiency, Late-Onset | Unknown | 0.0 | 0.4  |
| CRADD    | NM_003805.5    | Intellectual Developmental Disorder, Autosomal Recessive 34 (MRT34)                                                                                                                                                                                      | No      | 0.9 | 0.1  |
| CRB2     | NM_173689.7    | Focal segmental glomerulosclerosis 9, 616220 (3); Ventriculomegaly with cystic kidney disease, 219730 (3)                                                                                                                                                | Unknown | 0.0 | 1.1  |
| CRBN     | NM_016302.4    | Intellectual Developmental Disorder, Autosomal Recessive 2 (MRT2)                                                                                                                                                                                        | Unknown | 0.0 | 0.0  |
| CREBBP†  | NM_004380.3    | Rubinstein-Taybi Syndrome 1 (RSTS1)                                                                                                                                                                                                                      | Yes     | 1.0 | 3.9  |
| CRLF1    | NM_004750.5    | Cold-Induced Sweating Syndrome 1 (CISS1)                                                                                                                                                                                                                 | Unknown | 0.0 | 0.5  |
| CRX      | NM_000554.6    | Leber Congenital Amaurosis 7 (LCA7); Retinitis Pigmentosa (RP); Cone-Rod Dystrophy 2 (CORD2)                                                                                                                                                             | Unknown | 0.5 | 0.3  |
| CSF1R    | NM_001288705.3 | Leukoencephalopathy, Diffuse Hereditary, With Spheroids (HDLS)                                                                                                                                                                                           | Unknown | 0.1 | 1.6  |
| CSNK2A1† | NM_177559.3    | Okur-Chung neurodevelopmental syndrome, 617062 (3) pseudogene on 11p15                                                                                                                                                                                   | Unknown | 1.0 | 3.7  |
| CSNK2B†  | NM_001320.7    | Poirier-Bienvenu neurodevelopmental syndrome, 618732 (3)                                                                                                                                                                                                 | Unknown | 0.9 | 3.1  |
| CSPP1    | NM_001382391.1 | Joubert syndrome 21, 615636 (3)                                                                                                                                                                                                                          | No      | 0.0 | 0.7  |
| CSTB     | NM_000100.4    | Myoclonic Epilepsy of Unverricht and Lundborg                                                                                                                                                                                                            | No      | 0.0 | 0.0  |
| CTBP1†   | NM_001012614.2 | Hypotonia, ataxia, developmental delay, and tooth enamel defect syndrome, 617915 (3)                                                                                                                                                                     | Unknown | 1.0 | 3.3  |
| CTC1     | NM_025099.6    | Cerebroretinal Microangiopathy With Calcifications and Cysts (CRMCC)                                                                                                                                                                                     | No      | 0.0 | 0.5  |
| CTNNA2   | NM_001282597.3 | Cortical dysplasia, complex, with other brain malformations 9, 618174 (3)                                                                                                                                                                                | Unknown | 0.4 | 3.6  |
| CTNNA1†  | NM_001904.4    | Intellectual Developmental Disorder, Autosomal Dominant 19 (MRD19); Salivary Gland Adenoma, Pleomorphic; Ovarian Cancer; Mesothelioma, Malignant (MESOM); Medulloblastoma (MDB); Pilomatrixoma; Colorectal Cancer (CRC)                                  | Yes     | 1.0 | 3.8  |
| CTSA     | NM_000308.4    | Galactosialidosis (GSL)                                                                                                                                                                                                                                  | Unknown | 0.0 | 0.5  |
| CTSD     | NM_001909.5    | Ceroid Lipofuscinosis, Neuronal, 10 (CLN10)                                                                                                                                                                                                              | Unknown | 0.0 | 1.4  |
| CTSF     | NM_003793.4    | Ceroid Lipofuscinosis, Neuronal, 13 (CLN13)                                                                                                                                                                                                              | Unknown | 0.0 | 0.7  |
| CUL4B    | NM_001079872.2 | Intellectual Developmental Disorder, X-Linked, With Short Stature, Hypogonadism, And                                                                                                                                                                     | Yes     | 1.0 | 3.8  |
| CUX2†    | NM_015267.4    | Epileptic encephalopathy, early infantile, 67, 618141 (3)                                                                                                                                                                                                | Unknown | 1.0 | 3.2  |
| CXCR4    | NM_003467.3    | Whim Syndrome                                                                                                                                                                                                                                            | Unknown | 0.0 | 1.7  |
| CYFIP2†  | NM_001037333.3 | Epileptic encephalopathy, early infantile, 65, 618008 (3)                                                                                                                                                                                                | Unknown | 1.0 | 6.0  |
| CYP27A1  | NM_000784.4    | Cerebrotendinous Xanthomatosis (CTX)                                                                                                                                                                                                                     | Unknown | 0.0 | -0.3 |
| CYP27B1  | NM_000785.4    | Vitamin D-dependent rickets, type I, 264700 (3)                                                                                                                                                                                                          | Unknown | 0.0 | 0.1  |
| CYP27R1  | NM_024514.5    | Vitamin D Hydroxylation-Deficient Rickets, Type 1B (VDDR1B); Vitamin D Hydroxylation-Deficient Rickets, Type 1B (VDDR1B)                                                                                                                                 | Unknown | 0.0 | 0.5  |
| D2HGDH   | NM_152783.5    | D-2-Hydroxyglutaric Aciduria 1                                                                                                                                                                                                                           | Unknown | 0.1 | 0.7  |
| DAG1     | NM_004393.6    | Muscular Dystrophy-Dystroglycanopathy (Limb-Girdle), Type C, 9 (MDDGC9)                                                                                                                                                                                  | Unknown | 1.0 | 0.6  |
| DARS2    | NM_018122.5    | Leukoencephalopathy with Brainstem and Spinal Cord Involvement                                                                                                                                                                                           | No      | 0.0 | 1.2  |
| DBH      | NM_000787.4    | Dopamine Beta-Hydroxylase Deficiency, Congenital                                                                                                                                                                                                         | No      | 0.0 | -1.1 |
| DBT      | NM_001918.5    | Maple Syrup Urine Disease (MSUD)                                                                                                                                                                                                                         | Unknown | 0.0 | 1.0  |
| DCX      | NM_001195553.2 | Lissencephaly, X-linked, 300067 (3); Subcortical laminal heterotopia, X-linked, 300067 (3)                                                                                                                                                               | Yes     | 0.3 | 2.7  |
| DDB2     | NM_000107.3    | Xeroderma pigmentosum, group E, DDB-negative subtype, 278740 (3)                                                                                                                                                                                         | Unknown | 0.0 | 1.2  |
| DDOST    | NM_005216.5    | Congenital Disorder of Glycosylation, Type Ii (CDG1R)                                                                                                                                                                                                    | No      | 0.0 | 0.8  |

|                 |                |                                                                                                                                                                                                                     |           |     |      |
|-----------------|----------------|---------------------------------------------------------------------------------------------------------------------------------------------------------------------------------------------------------------------|-----------|-----|------|
| <i>DDX3X</i>    | NM_001356.5    | Intellectual developmental disorder, X-linked, syndrome, Snijders Blok type, 300958 (3)                                                                                                                             | Yes       | 1.0 | 4.3  |
| <i>DEAF1</i>    | NM_021008.4    | Vulto-van Silfout-de Vries syndrome, 615828 (3); Neurodevelopmental disorder with hypotonia, impaired expressive language, and with or without seizures, 617171 (3)                                                 | Unknown   | 0.0 | 1.5  |
| <i>DEGS1</i>    | NM_003676.4    | Leukodystrophy, hypomyelinating, 18, 618404 (3)                                                                                                                                                                     | Unknown   | 0.1 | 0.8  |
| <i>DENND5A</i>  | NM_015213.4    | Epileptic encephalopathy, early infantile, 49, 617281 (3)                                                                                                                                                           | Unknown   | 0.1 | 2.4  |
| <i>DEPDC5†</i>  | NM_001242896.3 | Epilepsy, familial focal, with variable foci 1, 604364 (3)                                                                                                                                                          | Unknown   | 0.1 | 2.7  |
| <i>DGUOK</i>    | NM_080916.3    | Mitochondrial DNA Depletion Syndrome 3 (Hepatocerebral Type) (MTDPS3)                                                                                                                                               | Unknown   | 0.0 | -0.5 |
| <i>DHCR24</i>   | NM_014762.4    | Desmosterolosis                                                                                                                                                                                                     | Unknown   | 0.0 | 1.5  |
| <i>DHCR7</i>    | NM_001360.3    | Smith-Lemli-Opitz Syndrome (SLOS)                                                                                                                                                                                   | No        | 0.0 | -0.5 |
| <i>DHDDS</i>    | NM_205861.3    | Retinitis Pigmentosa 59 (RP59)                                                                                                                                                                                      | Unknown   | 0.2 | 1.1  |
| <i>DHFR</i>     | NM_000791.4    | Megaloblastic Anemia Due to Dihydrofolate Reductase Deficiency                                                                                                                                                      | Unknown   | 0.0 | 1.0  |
| <i>DHPS</i>     | NM_001930.4    | Neurodevelopmental disorder with seizures and speech and walking impairment, 618480 (3)                                                                                                                             | Unknown   | 0.0 | -0.4 |
| <i>DHX30†</i>   | NM_138615.3    | Neurodevelopmental disorder with severe motor impairment and absent language, 617804 (3)                                                                                                                            | Unknown   | 1.0 | 5.3  |
| <i>DIAPH1†</i>  | NM_005219.5    | Deafness, autosomal dominant 1, with or without thrombocytopenia, 124900 (3); Seizures, cortical blindness, microcephaly syndrome, 616632 (3)                                                                       | Unknown   | 0.9 | 1.7  |
| <i>DIS3L2</i>   | NM_152383.5    | Perlman Syndrome (PRLMNS)                                                                                                                                                                                           | Unknown   | 0.9 | 0.9  |
| <i>DLD</i>      | NM_000108.5    | Dihydrofolipoamide Dehydrogenase Deficiency (DLDD)                                                                                                                                                                  | Unknown   | 0.0 | 1.1  |
| <i>DLG3</i>     | NM_021120.4    | Intellectual Developmental Disorder, X-Linked 90 (MRX90)                                                                                                                                                            | Unknown   | 1.0 | 2.9  |
| <i>DLG4†</i>    | NM_001321075.3 | Intellectual developmental disorder 62, 618793 (3)                                                                                                                                                                  | Unknown   | 1.0 | 4.9  |
| <i>DLL1†</i>    | NM_005618.4    | Neurodevelopmental disorder with nonspecific brain abnormalities and with or without seizures, 618709 (3)                                                                                                           | Unknown   | 1.0 | 1.8  |
| <i>DMBX1</i>    | NM_172225.2    | global developmental delay, intellectual disability, and epilepsy                                                                                                                                                   | Unknown   | 0.9 | 0.8  |
| <i>DMD</i>      | NM_004006.3    | Muscular Dystrophy, Duchenne Type (DMD); Cardiomyopathy, Dilated, 3B (CMD3B); Muscular Dystrophy, Becker Type (BMD)                                                                                                 | Yes       | 1.0 | -2.4 |
| <i>DMXL2</i>    | NM_001378457.1 | Polyendocrine-polyneuropathy syndrome, 616113 (3); Deafness, autosomal dominant 71, 617605 (3); Epileptic encephalopathy, early infantile, 81, 618663 (3) mutation identified in 1 PEPNS family and 1 DFNA71 family | Unknown   | 1.0 | 2.4  |
| <i>DNAJC19</i>  | NM_145261.4    | 3-methylglutaconic aciduria, type V, 610198 (3)                                                                                                                                                                     | Unknown   | 0.0 | 0.9  |
| <i>DNAJC5</i>   | NM_025219.3    | Ceroid lipofuscinosis, neuronal, 4, Parry type, 162350 (3)                                                                                                                                                          | Unknown   | 0.8 | 1.8  |
| <i>DNAJC6</i>   | NM_001256864.2 | Parkinson disease 19a, juvenile-onset, 615528 (3); Parkinson disease 19b, early-onset, 615528 (3)                                                                                                                   | No        | 1.0 | 1.6  |
| <i>DNASE1L3</i> | NM_004944.4    | Systemic Lupus Erythematosus 16 (SLEB16)                                                                                                                                                                            | Unknown   | 0.0 | 0.0  |
| <i>DNM1†</i>    | NM_004408.4    | Epileptic encephalopathy, early infantile, 31, 616346 (3)                                                                                                                                                           | Unknown   | 1.0 | 5.2  |
| <i>DNM1L</i>    | NM_012062.5    | Encephalopathy, Lethal, Due to Defective Mitochondrial And Peroxisomal                                                                                                                                              | Unknown   | 0.0 | 3.8  |
| <i>DNMT1†</i>   | NM_001130823.3 | Neuropathy, Hereditary Sensory, Type 1e (HSN1E); Cerebellar Ataxia, Deafness, And Narcolepsy, Autosomal Dominant (ADCADN)                                                                                           | Unknown   | 1.0 | 5.0  |
| <i>DNMT3A†</i>  | NM_022552.5    | Tatton-Brown-Rahman syndrome, 615879 (3); Acute myeloid leukemia, somatic, 601626 (3); Heyn-Sproul-Jackson syndrome, 618724 (3)                                                                                     | Uncertain | 0.0 | 3.4  |
| <i>DOCK6</i>    | NM_020812.4    | Adams-Oliver Syndrome 2 (AOS2)                                                                                                                                                                                      | Unknown   | 0.0 | 1.4  |
| <i>DOCK7</i>    | NM_001367561.1 | Epileptic encephalopathy, early infantile, 23, 615859 (3)                                                                                                                                                           | No        | 0.0 | 3.4  |
| <i>DOCK8</i>    | NM_203447.4    | Intellectual Developmental Disorder, Autosomal Dominant 2 (MRD2); Hyper-IgE Recurrent Infection Syndrome, Autosomal Recessive                                                                                       | Unknown   | 0.0 | -2.5 |
| <i>DOLK</i>     | NM_014908.4    | Congenital Disorder of Glycosylation, Type 1m (CDG1M)                                                                                                                                                               | Unknown   | 0.0 | 1.0  |
| <i>DPAGT1</i>   | NM_001382.4    | Myasthenic Syndrome, Congenital, With Tubular Aggregates 2 (CMSTA2); Congenital Disorder of Glycosylation, Type 1j (CDG1J)                                                                                          | No        | 0.0 | 1.4  |
| <i>DPM1</i>     | NM_003859.3    | Congenital Disorder of Glycosylation, Type 1e (CDG1E)                                                                                                                                                               | No        | 0.0 | 0.4  |
| <i>DPM2</i>     | NM_003863.4    | Congenital Disorder of Glycosylation, Type 1u (CDG1U)                                                                                                                                                               | Unknown   | 0.3 | 0.6  |
| <i>DPM3</i>     | NM_153741.2    | Congenital Disorder of Glycosylation, Type 1o (CDG1O)                                                                                                                                                               | No        | 0.2 | 0.4  |
| <i>DPYD</i>     | NM_000110.4    | Dihydropyrimidine Dehydrogenase Deficiency                                                                                                                                                                          | No        | 0.0 | -0.2 |
| <i>DPYS</i>     | NM_001385.3    | Dihydropyrimidinase Deficiency                                                                                                                                                                                      | Unknown   | 0.0 | 0.3  |
| <i>DUSP6</i>    | NM_001946.4    | Hypogonadotropic Hypogonadism 19 With or Without Anosmia (HH19)                                                                                                                                                     | Unknown   | 1.0 | 1.2  |

|                             |                |                                                                                                                                                                                              |           |     |      |
|-----------------------------|----------------|----------------------------------------------------------------------------------------------------------------------------------------------------------------------------------------------|-----------|-----|------|
| <i>DYNC1H1</i> <sup>†</sup> | NM_001376.5    | Intellectual Developmental Disorder, Autosomal Dominant 13 (MRD13); Charcot-Marie-Tooth Disease, Axonal, Type 2O (CMT2O); Spinal Muscular Atrophy, Lower Extremity-Predominant, 1, Autosomal | Unknown   | 1.0 | 11.0 |
| <i>DYRK1A</i> <sup>†</sup>  | NM_001347721.2 | Intellectual Developmental Disorder, Autosomal Dominant 7 (MRD7)                                                                                                                             | Unknown   | 1.0 | 3.3  |
| <i>EARS2</i>                | NM_001083614.2 | Combined Oxidative Phosphorylation Deficiency 12 (COXPD12)                                                                                                                                   | No        | 0.0 | 0.1  |
| <i>ECHS1</i>                | NM_004092.4    | Mitochondrial short-chain enoyl-CoA hydratase 1 deficiency, 616277 (3)                                                                                                                       | Unknown   | 0.0 | 0.9  |
| <i>ECM1</i>                 | NM_004425.4    | Lipoid Proteinosis of Urbach And Wiethe                                                                                                                                                      | Unknown   | 0.0 | -0.2 |
| <i>EDC3</i>                 | NM_025083.5    | Intellectual Developmental Disorder, autosomal recessive 50, 616460 (3) mutation identified in 1 MRT50 family                                                                                | Unknown   | 0.0 | 2.0  |
| <i>EDN3</i>                 | NM_207034.3    | Hirschsprung Disease, Susceptibility To, 4 (HSCR4); Waardenburg Syndrome, Type 4B (WS4B); Central Hypoventilation Syndrome, Congenital (CCHS)                                                | Unknown   | 0.0 | -0.9 |
| <i>EEF1A2</i> <sup>†</sup>  | NM_001958.5    | Intellectual Developmental Disorder, autosomal dominant 38, 616393 (3); Epileptic encephalopathy, early infantile, 33, 616409 (3)                                                            | Unknown   | 1.0 | 4.8  |
| <i>EFTUD2</i> <sup>†</sup>  | NM_004247.4    | Mandibulofacial Dysostosis, Guion-Almeida Type (MFDGA)                                                                                                                                       | Yes       | 1.0 | 4.0  |
| <i>EGF</i>                  | NM_001963.6    | Hypomagnesemia 4, renal, 611718 (3) linked to ADH3; cen-ADH3-EGF-IL2-qter                                                                                                                    | Unknown   | 0.0 | 0.9  |
| <i>EHMT1</i> <sup>†</sup>   | NM_024757.5    | Kleefstra Syndrome                                                                                                                                                                           | Yes       | 1.0 | 1.2  |
| <i>EIF2AK3</i>              | NM_004836.7    | Epiphyseal Dysplasia, Multiple, With Early-Onset Diabetes Mellitus                                                                                                                           | Unknown   | 0.0 | 2.0  |
| <i>EIF2B1</i>               | NM_001414.4    | Leukoencephalopathy With Vanishing White Matter (VWM)                                                                                                                                        | Unknown   | 0.0 | 1.4  |
| <i>EIF2B2</i>               | NM_014239.4    | Leukoencephalopathy With Vanishing White Matter (VWM)                                                                                                                                        | Unknown   | 0.0 | 1.0  |
| <i>EIF2B3</i>               | NM_020365.5    | Leukoencephalopathy With Vanishing White Matter (VWM)                                                                                                                                        | No        | 0.6 | 1.0  |
| <i>EIF2B4</i>               | NM_001034116.2 | Leukoencephalopathy With Vanishing White Matter (VWM)                                                                                                                                        | Unknown   | 1.0 | 0.8  |
| <i>EIF2B5</i>               | NM_003907.3    | Leukoencephalopathy With Vanishing White Matter (VWM)                                                                                                                                        | Unknown   | 0.1 | 0.8  |
| <i>EIF2S3</i>               | NM_001415.4    | MEHMO syndrome, 300148 (3)                                                                                                                                                                   | Unknown   | 1.0 | 3.6  |
| <i>EIF3F</i>                | NM_003754.3    | Intellectual Developmental Disorder, autosomal recessive 67, 618295 (3)                                                                                                                      | Unknown   | 1.0 | -0.1 |
| <i>ELOVL4</i>               | NM_022726.4    | Ichthyosis, Spastic Quadriplegia, And Intellectual Developmental Disorder (ISQMR); Stargardt Disease 3 (STGD3)                                                                               | Unknown   | 0.8 | 1.2  |
| <i>EMC1</i>                 | NM_015047.3    | Cerebellar atrophy, visual impairment, and psychomotor retardation, 616875 (3)                                                                                                               | Unknown   | 0.0 | 1.4  |
| <i>EMG1</i>                 | NM_006331.8    | Bowen-Conradi Syndrome (BWCNS)                                                                                                                                                               | Unknown   | 0.0 | -0.3 |
| <i>EML1</i>                 | NM_004434.3    | Band heterotopia, 600348 (3)                                                                                                                                                                 | Unknown   | 1.0 | 2.5  |
| <i>ENG</i>                  | NM_001114753.3 | Telangiectasia, Hereditary Hemorrhagic, Of Rendu, Osler, And Weber                                                                                                                           | Yes       | 1.0 | 0.9  |
| <i>EOGT</i>                 | NM_001278689.2 | Adams-Oliver Syndrome 4 (AOS4)                                                                                                                                                               | Unknown   | 0.0 | -0.1 |
| <i>EP300</i>                | NM_001429.4    | Rubinstein-Taybi Syndrome 2 (RSTS2)                                                                                                                                                          | Yes       | 1.0 | 2.0  |
| <i>EPB41L1</i> <sup>†</sup> | NM_012156.2    | Intellectual Developmental Disorder, Autosomal Dominant 11 (MRD11)                                                                                                                           | Unknown   | 0.9 | 1.9  |
| <i>EPCAM</i>                | NM_002354.3    | Diarrhea 5, with tufting enteropathy, congenital, 613217 (3); Colorectal cancer, hereditary nonpolyposis, type 8, 613244 (3) previously assigned to 4q                                       | No        | 0.0 | -1.4 |
| <i>EPG5</i>                 | NM_020964.3    | Vici Syndrome (VICIS)                                                                                                                                                                        | Unknown   | 0.0 | 1.1  |
| <i>EPM2A</i>                | NM_005670.4    | Myoclonic Epilepsy of Lafora                                                                                                                                                                 | No        | 0.0 | -0.3 |
| <i>ERCC1</i>                | NM_001983.4    | Cerebrooculofacioskeletal Syndrome 4 (COFS4)                                                                                                                                                 | Unknown   | 0.0 | 0.7  |
| <i>ERCC2</i>                | NM_000400.4    | Cerebrooculofacioskeletal Syndrome 2 (COFS2); Trichothiodystrophy, Photosensitive (TTDP); Xeroderma Pigmentosum, Complementation Group D (XPD)                                               | Unknown   | 0.0 | 0.4  |
| <i>ERCC3</i>                | NM_000122.2    | Xeroderma Pigmentosum, Complementation Group B (XPB); Trichothiodystrophy, Photosensitive (TTDP)                                                                                             | No        | 0.0 | 0.9  |
| <i>ERCC4</i>                | NM_005236.3    | Fanconi Anemia, Complementation Group Q (FANCQ); Xfe Progeroid Syndrome; Xeroderma Pigmentosum, Complementation Group F (XPF)                                                                | Unknown   | 0.0 | -0.8 |
| <i>ERCC5</i>                | NM_000123.4    | Xeroderma Pigmentosum, Complementation Group G (XPG)                                                                                                                                         | Unknown   | 0.0 | 0.1  |
| <i>ERCC6</i>                | NM_000124.4    | Macular Degeneration, Age-Related, 5 (ARM5); Uv-Sensitive Syndrome 1 (UVSS1); De Sanctis-Cacchione Syndrome; Cerebrooculofacioskeletal Syndrome 1 (COFS1); Cockayne Syndrome B (CSB)         | Unknown   | 0.0 | 0.1  |
| <i>ERCC8</i>                | NM_000082.4    | Uv-Sensitive Syndrome 2 (UVSS2); Cockayne Syndrome A (CSA)                                                                                                                                   | No        | 0.0 | -0.4 |
| <i>ERLIN2</i>               | NM_007175.8    | Spastic Paraplegia 18, Autosomal Recessive (SPG18)                                                                                                                                           | Unknown   | 0.0 | 1.9  |
| <i>ERMARD</i>               | NM_018341.3    | Periventricular nodular heterotopia 6, 615544 (3)                                                                                                                                            | Uncertain | 0.0 | -0.3 |
| <i>ETHE1</i>                | NM_014297.5    | Encephalopathy, Ethylmalonic (EE)                                                                                                                                                            | Unknown   | 0.0 | 1.0  |
| <i>EXOSC3</i>               | NM_016042.4    | Pontocerebellar Hypoplasia, Type 1B (PCH1B)                                                                                                                                                  | No        | 0.0 | -0.2 |



|                            |                |                                                                                                                                                                                                                                                                                                                                                                                                                                                                                                                                                                                                                                                                                                                                                                                                                                                                                  |         |     |      |
|----------------------------|----------------|----------------------------------------------------------------------------------------------------------------------------------------------------------------------------------------------------------------------------------------------------------------------------------------------------------------------------------------------------------------------------------------------------------------------------------------------------------------------------------------------------------------------------------------------------------------------------------------------------------------------------------------------------------------------------------------------------------------------------------------------------------------------------------------------------------------------------------------------------------------------------------|---------|-----|------|
| <i>EXT2</i>                | NM_207122.2    | Potocki-Shaffer Syndrome; Exostoses, Multiple, Type II                                                                                                                                                                                                                                                                                                                                                                                                                                                                                                                                                                                                                                                                                                                                                                                                                           | Yes     | 0.0 | 0.6  |
| <i>EZH2</i> <sup>†</sup>   | NM_004456.5    | Weaver Syndrome (WVS)                                                                                                                                                                                                                                                                                                                                                                                                                                                                                                                                                                                                                                                                                                                                                                                                                                                            | Unknown | 1.0 | 4.7  |
| <i>FA2H</i>                | NM_024306.5    | Spastic paraplegia 35, autosomal recessive, 612319 (3)                                                                                                                                                                                                                                                                                                                                                                                                                                                                                                                                                                                                                                                                                                                                                                                                                           | Unknown | 0.1 | 0.5  |
| <i>FADD</i>                | NM_003824.4    | Infections, Recurrent, With Encephalopathy, Hepatic Dysfunction, And                                                                                                                                                                                                                                                                                                                                                                                                                                                                                                                                                                                                                                                                                                                                                                                                             | No      | 0.5 | 0.8  |
| <i>FAM111A</i>             | NM_001312909.2 | Gracile Bone Dysplasia (GCLEB); Kenny-Caffey Syndrome, Type 2 (KCS2)                                                                                                                                                                                                                                                                                                                                                                                                                                                                                                                                                                                                                                                                                                                                                                                                             | Unknown | 0.0 | 0.0  |
| <i>FAM126A</i>             | NM_032581.4    | Leukodystrophy, Hypomyelinating, 5 (HLD5)                                                                                                                                                                                                                                                                                                                                                                                                                                                                                                                                                                                                                                                                                                                                                                                                                                        | Unknown | 0.1 | 1.0  |
| <i>FAM58A</i>              | NM_152274.5    | Toe Syndactyly, Telecanthus, and Anogenital and Renal Malformations                                                                                                                                                                                                                                                                                                                                                                                                                                                                                                                                                                                                                                                                                                                                                                                                              | Unknown | 0.9 | 1.1  |
| <i>FAR1</i>                | NM_032228.6    | Peroxisomal fatty acyl-CoA reductase 1 disorder, 616154 (3)                                                                                                                                                                                                                                                                                                                                                                                                                                                                                                                                                                                                                                                                                                                                                                                                                      | Unknown | 1.0 | 3.3  |
| <i>FARS2</i>               | NM_006567.5    | Combined Oxidative Phosphorylation Deficiency 14 (COXPD14)                                                                                                                                                                                                                                                                                                                                                                                                                                                                                                                                                                                                                                                                                                                                                                                                                       | No      | 0.0 | 0.7  |
| <i>FAS</i>                 | NM_000043.6    | Autoimmune Lymphoproliferative Syndrome (ALPS)                                                                                                                                                                                                                                                                                                                                                                                                                                                                                                                                                                                                                                                                                                                                                                                                                                   | Unknown | 0.8 | 1.2  |
| <i>FASTKD2</i>             | NM_001136193.2 | Combined oxidative phosphorylation deficiency 44, 618855 (3)                                                                                                                                                                                                                                                                                                                                                                                                                                                                                                                                                                                                                                                                                                                                                                                                                     | Unknown | 0.0 | 0.7  |
| <i>FAT4</i>                | NM_001291303.3 | Van Maldergem syndrome 2, 615546 (3); Hennekam lymphangiectasia-lymphedema syndrome 2, 616006 (3)                                                                                                                                                                                                                                                                                                                                                                                                                                                                                                                                                                                                                                                                                                                                                                                | Unknown | 1.0 | 0.6  |
| <i>FBP1</i>                | NM_000507.4    | Fructose-1,6-Bisphosphatase Deficiency                                                                                                                                                                                                                                                                                                                                                                                                                                                                                                                                                                                                                                                                                                                                                                                                                                           | No      | 0.1 | 0.7  |
| <i>FBXL4</i>               | NM_001278716.2 | Mitochondrial DNA depletion syndrome 13 (encephalomyopathic type), 615471 (3)                                                                                                                                                                                                                                                                                                                                                                                                                                                                                                                                                                                                                                                                                                                                                                                                    | Unknown | 0.0 | 0.6  |
| <i>FBXO11</i> <sup>†</sup> | NM_001190274.2 | Intellectual developmental disorder with dysmorphic facies and behavioral abnormalities, 618089 (3) 2p16                                                                                                                                                                                                                                                                                                                                                                                                                                                                                                                                                                                                                                                                                                                                                                         | Unknown | 1.0 | 4.4  |
| <i>FBXO31</i>              | NM_024735.5    | Intellectual Developmental Disorder, autosomal recessive 45, 615979 (3) mutation identified in 1 MRT45 family                                                                                                                                                                                                                                                                                                                                                                                                                                                                                                                                                                                                                                                                                                                                                                    | Unknown | 0.4 | 2.5  |
| <i>FDFT1</i>               | NM_004462.5    | Squalene synthase deficiency, 618156 (3)                                                                                                                                                                                                                                                                                                                                                                                                                                                                                                                                                                                                                                                                                                                                                                                                                                         | Unknown | 0.0 | -3.9 |
| <i>FDXR</i>                | NM_024417.5    | Auditory neuropathy and optic atrophy, 617717 (3)                                                                                                                                                                                                                                                                                                                                                                                                                                                                                                                                                                                                                                                                                                                                                                                                                                | Unknown | 0.0 | 0.9  |
| <i>FEZF1</i>               | NM_001024613.4 | Hypogonadotropic hypogonadism 22, with or without anosmia, 616030 (3)                                                                                                                                                                                                                                                                                                                                                                                                                                                                                                                                                                                                                                                                                                                                                                                                            | Unknown | 1.0 | 1.3  |
| <i>FGF12</i> <sup>†</sup>  | NM_004113.6    | Developmental and epileptic encephalopathy 47                                                                                                                                                                                                                                                                                                                                                                                                                                                                                                                                                                                                                                                                                                                                                                                                                                    | Unknown | 0.6 | 1.5  |
| <i>FGF17</i>               | NM_003867.4    | Hypogonadotropic Hypogonadism 20 with or without Anosmia (HH20)                                                                                                                                                                                                                                                                                                                                                                                                                                                                                                                                                                                                                                                                                                                                                                                                                  | Unknown | 1.0 | 1.9  |
| <i>FGF8</i>                | NM_033163.5    | Hypogonadotropic Hypogonadism 6 with or without Anosmia (HH6)                                                                                                                                                                                                                                                                                                                                                                                                                                                                                                                                                                                                                                                                                                                                                                                                                    | Unknown | 0.7 | 1.6  |
| <i>FGFR1</i> <sup>†</sup>  | NM_023110.3    | Trigonocephaly 1 (TRIGNO1); Osteoglophonic Dysplasia (OGD); Hypogonadotropic Hypogonadism 2 With or Without Anosmia (HH2); Pfeiffer Syndrome                                                                                                                                                                                                                                                                                                                                                                                                                                                                                                                                                                                                                                                                                                                                     | Unknown | 1.0 | 2.5  |
| <i>FGFR2</i> <sup>†</sup>  | NM_000141.5    | Bent Bone Dysplasia Syndrome (BBDS); Scaphocephaly, Maxillary Retrusion, And Intellectual Developmental Disorder; Antley-Bixler Syndrome Without Genital Anomalies or Disordered Steroidogenesis; Lacrimoauriculodentodigital Syndrome (LADD); Beare-Stevenson Cutis Gyrate Syndrome (BSTVS); Crouzon Syndrome; Jackson-Weiss Syndrome (JWS); Pfeiffer Syndrome; Apert Syndrome                                                                                                                                                                                                                                                                                                                                                                                                                                                                                                  | Unknown | 1.0 | 2.4  |
| <i>FGFR3</i>               | NM_000142.5    | Crouzon Syndrome with Acanthosis Nigricans (CAN); Camptodactyly, Tall Stature, And Hearing Loss Syndrome; Cervical Cancer; Muenke Syndrome (MNKES); Testicular Germ Cell Tumor (TGCT); Myeloma, Multiple; Thanatophoric Dysplasia, Type II (TD2); Thanatophoric Dysplasia, Type I (TD1); Keratosis, Seborrhic; Nevus, Epidermal; Lacrimoauriculodentodigital Syndrome (LADD); Hypochondroplasia (HCH); Bladder Cancer; Achondroplasia (ACH)                                                                                                                                                                                                                                                                                                                                                                                                                                      | Unknown | 0.0 | 1.3  |
| <i>FIG4</i>                | NM_014845.6    | Amyotrophic Lateral Sclerosis 11 (ALS11); Charcot-Marie-Tooth Disease, Type 4J (CMT4J); Yunis-Varon Syndrome (YVS)                                                                                                                                                                                                                                                                                                                                                                                                                                                                                                                                                                                                                                                                                                                                                               | Unknown | 0.0 | 1.9  |
| <i>FKRP</i>                | NM_024301.5    | Muscular Dystrophy-Dystroglycanopathy (Congenital with Brain and Eye; Muscular Dystrophy-Dystroglycanopathy (Limb-Girdle), Type C, 5 (MDDGC5); Muscular Dystrophy-Dystroglycanopathy (Congenital with or without impaired intellectual development)                                                                                                                                                                                                                                                                                                                                                                                                                                                                                                                                                                                                                              | Unknown | 0.0 | 1.8  |
| <i>FKTN</i>                | NM_001079802.2 | Muscular Dystrophy-Dystroglycanopathy (Congenital Without Intellectual Developmental Disorder); Cardiomyopathy, Dilated, 1X (CMD1X); Muscular Dystrophy-Dystroglycanopathy (Limb-Girdle), Type C, 4 (MDDGC4); Muscular Dystrophy-Dystroglycanopathy (Congenital with Brain and Eye)                                                                                                                                                                                                                                                                                                                                                                                                                                                                                                                                                                                              | Unknown | 0.0 | 0.0  |
| <i>FLI1</i>                | NM_002017.5    | Ewing Sarcoma (ES)                                                                                                                                                                                                                                                                                                                                                                                                                                                                                                                                                                                                                                                                                                                                                                                                                                                               | Unknown | 1.0 | 2.4  |
| <i>FLNA</i>                | NM_001110556.2 | Cardiac Valvular Dysplasia, X-Linked (CVD1); Otopalatodigital Syndrome, Type I (OPD1); Melnick-Needles Syndrome (MNS); Frontometaphyseal Dysplasia (FMD); Otopalatodigital Syndrome, Type II (OPD2); Heterotopia, Periventricular, Ehlers-Danlos Variant; Fg Syndrome 2 (FGS2); Terminal Osseous Dysplasia (TOD); Heterotopia, Periventricular, X-Linked Dominant; Intestinal Pseudoobstruction, Neuronal, Chronic Idiopathic, X-Linked; Cardiac Valvular Dysplasia, X-Linked (CVD1); Otopalatodigital Syndrome, Type I (OPD1); Melnick-Needles Syndrome (MNS); Frontometaphyseal Dysplasia (FMD); Otopalatodigital Syndrome, Type II (OPD2); Heterotopia, Periventricular, Ehlers-Danlos Variant; Fg Syndrome 2 (FGS2); Terminal Osseous Dysplasia (TOD); Heterotopia, Periventricular, X-Linked Dominant; Intestinal Pseudoobstruction, Neuronal, Chronic Idiopathic, X-Linked | Yes     | 1.0 | 3.8  |

|                 |                |                                                                                                                                                                                                                                                                                                                                                          |           |     |      |
|-----------------|----------------|----------------------------------------------------------------------------------------------------------------------------------------------------------------------------------------------------------------------------------------------------------------------------------------------------------------------------------------------------------|-----------|-----|------|
| <i>FLRT3</i>    | NM_198391.3    | Hypogonadotropic Hypogonadism 21 With or Without Anosmia (HH21)                                                                                                                                                                                                                                                                                          | Unknown   | 0.2 | 1.9  |
| <i>FLVCR2</i>   | NM_017791.3    | Proliferative Vasculopathy and Hydranencephaly-Hydrocephaly Syndrome                                                                                                                                                                                                                                                                                     | No        | 0.0 | 0.1  |
| <i>FMN2</i>     | NM_020066.5    | Intellectual Developmental Disorder, autosomal recessive 47, 616193 (3)                                                                                                                                                                                                                                                                                  | Unknown   | 1.0 | 0.3  |
| <i>FMR1</i>     | NM_002024.6    | Premature Ovarian Failure 1 (POF1); Fragile X Intellectual Developmental Disorder Syndrome; Fragile X Tremor/Ataxia Syndrome (FXTAS); Premature Ovarian Failure 1 (POF1); Fragile X Intellectual Developmental Disorder Syndrome; Fragile X Tremor/Ataxia Syndrome (FXTAS)                                                                               | Unknown   | 0.6 | 3.0  |
| <i>FOLR1</i>    | NM_016729.3    | Neurodegeneration Due to Cerebral Folate Transport Deficiency                                                                                                                                                                                                                                                                                            | No        | 0.1 | 0.7  |
| <i>FOXG1†</i>   | NM_005249.5    | Rett Syndrome, Congenital Variant                                                                                                                                                                                                                                                                                                                        | Yes       | 0.9 | 3.5  |
| <i>FOXP1†</i>   | NM_001349338.3 | Intellectual Developmental Disorder with Language Impairment And Autistic Features                                                                                                                                                                                                                                                                       | Yes       | 1.0 | 2.3  |
| <i>FOXRED1</i>  | NM_017547.4    | Mitochondrial Complex I Deficiency                                                                                                                                                                                                                                                                                                                       | No        | 0.0 | -0.4 |
| <i>FRRS1L</i>   | NM_014334.4    | Epileptic encephalopathy, early infantile, 37, 616981 (3)                                                                                                                                                                                                                                                                                                | Unknown   | 0.0 | 0.6  |
| <i>FTL</i>      | NM_000146.4    | Hyperferritinemia-cataract syndrome, 600886 (3); Neurodegeneration with brain iron accumulation 3, 606159 (3); L-ferritin deficiency, dominant and recessive, 615604 (3)                                                                                                                                                                                 | Unknown   | 0.0 | -0.4 |
| <i>FTO</i>      | NM_001080432.3 | Growth Retardation, Developmental Delay, Coarse Facies, And Early                                                                                                                                                                                                                                                                                        | Unknown   | 0.0 | 0.6  |
| <i>FTSJ1</i>    | NM_012280.4    | Intellectual Developmental Disorder, X-Linked 9 (MRX9); Intellectual Developmental Disorder, X-Linked 9 (MRX9)                                                                                                                                                                                                                                           | Yes       | 1.0 | 2.2  |
| <i>FUCA1</i>    | NM_000147.5    | Fucosidosis                                                                                                                                                                                                                                                                                                                                              | Unknown   | 0.0 | 0.8  |
| <i>FUK</i>      | NM_145059.3    | Congenital disorder of glycosylation with defective fucosylation 2, 618324 (3)                                                                                                                                                                                                                                                                           | Unknown   | 0.0 | 0.4  |
| <i>FUT8</i>     | NM_001371533.1 | Congenital disorder of glycosylation with defective fucosylation 1, 618005 (3)                                                                                                                                                                                                                                                                           | Unknown   | 0.0 | 2.2  |
| <i>FXSD2</i>    | NM_001680.5    | Hypomagnesemia 2, Renal (HOMG2)                                                                                                                                                                                                                                                                                                                          | Unknown   | 0.1 | -0.2 |
| <i>G6PC</i>     | NM_000151.4    | Glycogen storage disease Ia, 232200 (3)                                                                                                                                                                                                                                                                                                                  | Unknown   | 0.0 | 0.3  |
| <i>GABBR2†</i>  | NM_005458.8    | Nicotine dependence, susceptibility to, 188890 (3); Nicotine dependence, protection against, 188890 (3); Epileptic encephalopathy, early infantile, 59, 617904 (3); Neurodevelopmental disorder with poor language and loss of hand skills, 617903 (3)                                                                                                   | Unknown   | 1.0 | 4.6  |
| <i>GABRA1†</i>  | NM_001127644.2 | Epilepsy, Juvenile Myoclonic, Susceptibility To, 5 (EJM5)                                                                                                                                                                                                                                                                                                | Unknown   | 0.9 | 3.1  |
| <i>GABRA2†</i>  | NM_000807.4    | Alcohol dependence, susceptibility to, 103780 (3); Epileptic encephalopathy, early infantile, 78, 618557 (3)                                                                                                                                                                                                                                             | Unknown   | 1.0 | 3.1  |
| <i>GABRA5†</i>  | NM_000810.4    | Epileptic encephalopathy, early infantile, 79, 618559 (3) 100kb from GABRB3                                                                                                                                                                                                                                                                              | Unknown   | 0.9 | 3.2  |
| <i>GABRB1†</i>  | NM_000812.4    | Epileptic encephalopathy, early infantile, 45, 617153 (3)                                                                                                                                                                                                                                                                                                | Unknown   | 1.0 | 2.7  |
| <i>GABRB2†</i>  | NM_001371727.1 | Epileptic encephalopathy, infantile or early childhood, 2, 617829 (3)                                                                                                                                                                                                                                                                                    | Unknown   | 0.8 | 3.4  |
| <i>GABRB3†</i>  | NM_000814.6    | Epilepsy, Childhood Absence, Susceptibility To, 5 (ECA5); Gamma-Aminobutyric Acid Receptor, Beta-3 (GABRB3)                                                                                                                                                                                                                                              | Unknown   | 1.0 | 3.4  |
| <i>GABRG2†</i>  | NM_198904.4    | Generalized Epilepsy with Febrile Seizures Plus, Type 3 (GEFSP3); Epilepsy, Childhood Absence, Susceptibility To, 2 (ECA2); Dravet Syndrome; Generalized Epilepsy With Febrile Seizures Plus, Type 1 (GEFSP1)                                                                                                                                            | Uncertain | 0.7 | 3.0  |
| <i>GAD1</i>     | NM_000817.3    | Cerebral Palsy, Spastic Quadriplegic, 1 (CPSQ1)                                                                                                                                                                                                                                                                                                          | Unknown   | 0.0 | 2.3  |
| <i>GAL†</i>     | NM_015973.5    | Epilepsy, familial temporal lobe, 8, 616461 (3) mutation identified in 1 ETL8 family                                                                                                                                                                                                                                                                     | Unknown   | 0.0 | -0.1 |
| <i>GALC</i>     | NM_000153.4    | Krabbe Disease                                                                                                                                                                                                                                                                                                                                           | Unknown   | 0.0 | 0.2  |
| <i>GAMT</i>     | NM_000156.6    | Cerebral Creatine Deficiency Syndrome 2 (CCDS2)                                                                                                                                                                                                                                                                                                          | No        | 0.0 | -0.1 |
| <i>GATA3</i>    | NM_001002295.2 | Hypoparathyroidism, Sensorineural Deafness, And Renal Disease (HDR)                                                                                                                                                                                                                                                                                      | Yes       | 0.9 | 1.9  |
| <i>GATA6†</i>   | NM_005257.6    | Atrial Septal Defect 9 (ASD9); Atrioventricular Septal Defect 5 (AVSD5); Pancreatic Agenesis and Congenital Heart Defects (PACHD); Conotruncal Heart Malformations (CTHM); Tetralogy Of Fallot (TOF)                                                                                                                                                     | Yes       | 1.0 | 1.3  |
| <i>GATAD2B†</i> | NM_020699.4    | Intellectual Developmental Disorder, Autosomal Dominant 18 (MRD18); Intellectual Developmental Disorder, Autosomal Dominant 18 (MRD18)                                                                                                                                                                                                                   | Yes       | 1.0 | 3.2  |
| <i>GBA</i>      | NM_000157.4    | Gaucher disease, type I, 230800 (3); Gaucher disease, type II, 230900 (3); Gaucher disease, type III, 231000 (3); Gaucher disease, type IIIC, 231005 (3); Gaucher disease, perinatal lethal, 608013 (3); Parkinson disease, late-onset, susceptibility to, 168600 (3); Lewy body dementia, susceptibility to, 127750 (3) pseudogene GBAP ~16kb 3' to GBA | No        | 0.0 | 1.2  |
| <i>GCDH</i>     | NM_000159.4    | Glutaric Acidemia I                                                                                                                                                                                                                                                                                                                                      | Unknown   | 0.0 | 0.3  |
| <i>GCH1</i>     | NM_000161.3    | Hyperphenylalaninemia, Bh4-Deficient, B (HPABH4B); Dystonia, Dopa-Responsive (DRD)                                                                                                                                                                                                                                                                       | Yes       | 0.9 | 1.5  |
| <i>GCM2</i>     | NM_004752.4    | Hypoparathyroidism, Familial Isolated (FIH)                                                                                                                                                                                                                                                                                                              | Unknown   | 0.0 | 0.7  |
| <i>GCSH</i>     | NM_004483.5    | Glycine Encephalopathy (GCE)                                                                                                                                                                                                                                                                                                                             | Unknown   | 0.0 | 0.1  |

|                          |                |                                                                                                                                                                                                                                                                                                                                           |           |     |      |
|--------------------------|----------------|-------------------------------------------------------------------------------------------------------------------------------------------------------------------------------------------------------------------------------------------------------------------------------------------------------------------------------------------|-----------|-----|------|
| <i>GDI1</i>              | NM_001493.3    | Intellectual Developmental Disorder, X-Linked 41 (MRX41); Intellectual Developmental Disorder, X-Linked 41 (MRX41)                                                                                                                                                                                                                        | Unknown   | 1.0 | 3.3  |
| <i>GDNF</i>              | NM_000514.4    | Hirschsprung Disease, Susceptibility To, 3 (HSCR3); Central Hypoventilation Syndrome, Congenital (CCHS)                                                                                                                                                                                                                                   | Unknown   | 0.2 | 1.1  |
| <i>GFAP<sup>†</sup></i>  | NM_002055.5    | Alexander Disease                                                                                                                                                                                                                                                                                                                         | Unknown   | 0.0 | 0.9  |
| <i>GFM1</i>              | NM_024996.7    | Combined Oxidative Phosphorylation Deficiency 1 (COXPD1)                                                                                                                                                                                                                                                                                  | No        | 0.0 | 1.3  |
| <i>GFM2</i>              | NM_032380.5    | Combined oxidative phosphorylation deficiency 39, 618397 (3)                                                                                                                                                                                                                                                                              | Unknown   | 0.0 | 0.8  |
| <i>GJA1</i>              | NM_000165.5    | Atrioventricular Septal Defect 3 (AVSD3); Oculodentodigital Dysplasia, Autosomal Recessive; Hypoplastic Left Heart Syndrome 1 (HLHS1); Hallermann-Streiff Syndrome (HSS); Syndactyly, Type Iii; Oculodentodigital Dysplasia (ODDD)                                                                                                        | Unknown   | 0.2 | 1.3  |
| <i>GJC2</i>              | NM_020435.4    | Lymphedema, Hereditary, Ic; Spastic Paraplegia 44, Autosomal Recessive (SPG44); Leukodystrophy, Hypomyelinating, 2 (HLD2)                                                                                                                                                                                                                 | Unknown   | 0.0 | 1.9  |
| <i>GK</i>                | NM_001205019.2 | Hyperglycerolemia                                                                                                                                                                                                                                                                                                                         | Yes       | 1.0 | 3.2  |
| <i>GLA</i>               | NM_000169.3    | Fabry Disease; Fabry Disease                                                                                                                                                                                                                                                                                                              | Yes       | 1.0 | 1.9  |
| <i>GLB1</i>              | NM_000404.4    | Mucopolysaccharidosis Type Ivb; Gm1-Gangliosidosis, Type Iii; Gm1-Gangliosidosis, Type Ii; Gm1-Gangliosidosis, Type I                                                                                                                                                                                                                     | No        | 0.0 | 0.8  |
| <i>GLDC</i>              | NM_000170.3    | Glycine Encephalopathy (GCE)                                                                                                                                                                                                                                                                                                              | No        | 0.0 | -1.6 |
| <i>GLI2</i>              | NM_001374353.1 | Holoprosencephaly 9 (HPE9)                                                                                                                                                                                                                                                                                                                | Unknown   | 1.0 | 0.8  |
| <i>GLI3<sup>†</sup></i>  | NM_000168.6    | Greig Cephalopolysyndactyly Syndrome (GCPS); Polydactyly, Preaxial Iv; Polydactyly, Postaxial, Type A1 (PAPA1); Pallister-Hall Syndrome (PHS)                                                                                                                                                                                             | Unknown   | 1.0 | 0.5  |
| <i>GLRA1</i>             | NM_000171.4    | Hyperekplexia, Hereditary 1 (HKPX1)                                                                                                                                                                                                                                                                                                       | Unknown   | 0.0 | 1.4  |
| <i>GLRB</i>              | NM_000824.5    | Hyperekplexia 2 (HKPX2)                                                                                                                                                                                                                                                                                                                   | No        | 0.0 | 0.8  |
| <i>GLS</i>               | NM_014905.5    | Epileptic encephalopathy, early infantile, 71, 618328 (3); Infantile cataract, skin abnormalities, glutamate excess, and impaired intellectual development, 618339 (3); Global developmental delay, progressive ataxia, and elevated glutamine, 618412 (3) mutation identified in 1 CASGID patient                                        | Unknown   | 1.0 | 3.7  |
| <i>GLUD1<sup>†</sup></i> | NM_005271.5    | Hyperinsulinemic Hypoglycemia, Familial, 6 (HHF6)                                                                                                                                                                                                                                                                                         | Unknown   | 0.0 | 3.1  |
| <i>GLUL</i>              | NM_001033044.4 | Glutamine Deficiency, Congenital                                                                                                                                                                                                                                                                                                          | No        | 1.0 | 1.6  |
| <i>GLYCTK</i>            | NM_145262.4    | D-Glyceric Aciduria                                                                                                                                                                                                                                                                                                                       | Unknown   | 0.0 | -0.2 |
| <i>GM2A</i>              | NM_000405.5    | Gm2-Gangliosidosis, Ab Variant                                                                                                                                                                                                                                                                                                            | Unknown   | 0.0 | -0.3 |
| <i>GMPPA</i>             | NM_013335.4    | Alacrima, achalasia, and Intellectual Developmental Disorder syndrome, 615510 (3)                                                                                                                                                                                                                                                         | No        | 0.0 | 1.2  |
| <i>GMPPB</i>             | NM_021971.4    | Muscular Dystrophy-Dystroglycanopathy (Limb-Girdle), Type C, 14 (MDDGC14); Muscular Dystrophy-Dystroglycanopathy (Congenital With Intellectual Developmental Disorder);; Muscular Dystrophy-Dystroglycanopathy (Congenital With Brain And Eye                                                                                             | Unknown   | 0.0 | 1.0  |
| <i>GNAO1<sup>†</sup></i> | NM_020988.3    | Epileptic encephalopathy, early infantile, 17, 615473 (3); Neurodevelopmental disorder with involuntary movements, 617493 (3) close to MT1 in mouse                                                                                                                                                                                       | Unknown   | 1.0 | 3.2  |
| <i>GNAQ</i>              | NM_002072.5    | Sturge-Weber Syndrome (SWS); Capillary Malformations, Congenital (CMC)                                                                                                                                                                                                                                                                    | Unknown   | 1.0 | 3.7  |
| <i>GNAS</i>              | NM_000516.7    | Pseudohypoparathyroidism, Type Ic (PHP1C); Pseudohypoparathyroidism, Type Ib (PHP1B); Acth-Independent Macronodular Adrenal Hyperplasia (AIMAH); Mccune-Albright Syndrome (MAS); Osseous Heteroplasia, Progressive (POH); Colorectal Cancer (CRC); Pseudohypoparathyroidism, Type Ia (PHP1A); Pituitary Adenoma, Growth Hormone-Secreting | Yes       | 0.7 | 2.7  |
| <i>GNB1<sup>†</sup></i>  | NM_002074.5    | Intellectual Developmental Disorder, autosomal dominant 42, 616973 (3); Leukemia, acute lymphoblastic, somatic, 613065 (3)                                                                                                                                                                                                                | Uncertain | 1.0 | 3.8  |
| <i>GNB5</i>              | NM_016194.4    | Intellectual developmental disorder with cardiac arrhythmia, 617173 (3); Language delay and ADHD/cognitive impairment with or without cardiac arrhythmia, 617182 (3)                                                                                                                                                                      | Unknown   | 0.0 | 1.5  |
| <i>GNE</i>               | NM_005476.7    | Nonaka Myopathy (NM); Inclusion Body Myopathy 2, Autosomal Recessive (IBM2); Sialuria                                                                                                                                                                                                                                                     | Unknown   | 0.0 | 2.6  |
| <i>GNS</i>               | NM_002076.4    | Mucopolysaccharidosis Type Iiid                                                                                                                                                                                                                                                                                                           | Unknown   | 0.0 | 1.4  |
| <i>GOSR2</i>             | NM_004287.5    | Epilepsy, Progressive Myoclonic 6 (EPM6)                                                                                                                                                                                                                                                                                                  | Unknown   | 0.0 | -0.5 |
| <i>GOT2</i>              | NM_002080.4    | Epileptic encephalopathy, early infantile, 82, 618721 (3) pseudogenes on 12 and 1                                                                                                                                                                                                                                                         | Unknown   | 0.0 | 1.4  |
| <i>GP1BB</i>             | NM_000407.5    | Bernard-Soulier Syndrome (BSS)                                                                                                                                                                                                                                                                                                            | Unknown   | 0.5 | 0.5  |
| <i>GPA1</i>              | NM_003801.4    | Glycosylphosphatidylinositol biosynthesis defect 15, 617810 (3)                                                                                                                                                                                                                                                                           | Unknown   | 0.0 | 0.9  |
| <i>GPC3</i>              | NM_004484.4    | Simpson-Golabi-Behmel Syndrome, Type 1 (SGBS1)                                                                                                                                                                                                                                                                                            | Yes       | 1.0 | 1.5  |
| <i>GPC4</i>              | NM_001448.3    | Keipert syndrome, 301026 (3) centromeric to GPC3                                                                                                                                                                                                                                                                                          | Unknown   | 0.9 | 1.7  |
| <i>GPHN<sup>†</sup></i>  | NM_020806.5    | Molybdenum cofactor deficiency C, 615501 (3)                                                                                                                                                                                                                                                                                              | Unknown   | 1.0 | 3.4  |

|                |                |                                                                                                                                                                                                                                  |           |     |      |
|----------------|----------------|----------------------------------------------------------------------------------------------------------------------------------------------------------------------------------------------------------------------------------|-----------|-----|------|
| <i>GP2M2</i>   | NM_013296.5    | Chudley-Mccullough Syndrome (CMCS)                                                                                                                                                                                               | No        | 0.0 | 1.3  |
| <i>GPT2</i>    | NM_133443.4    | Intellectual Developmental Disorder, autosomal recessive 49, 616281 (3)                                                                                                                                                          | Unknown   | 0.0 | 1.9  |
| <i>GRIA2†</i>  | NM_001083619.3 | Neurodevelopmental disorder with language impairment and behavioral abnormalities, 618917 (3)                                                                                                                                    | Unknown   | 1.0 | 4.6  |
| <i>GRIA3</i>   | NM_007325.5    | Intellectual Developmental Disorder, X-Linked, Syndromic, Wu Type (MRXSW)                                                                                                                                                        | Unknown   | 1.0 | 4.2  |
| <i>GRIA4†</i>  | NM_000829.4    | Neurodevelopmental disorder with or without seizures and gait abnormalities, 617864 (3)                                                                                                                                          | Unknown   | 0.0 | 3.4  |
| <i>GRIK2</i>   | NM_021956.5    | Intellectual Developmental Disorder, Autosomal Recessive 6 (MRT6)                                                                                                                                                                | No        | 1.0 | 2.9  |
| <i>GRIN1</i>   | NM_007327.4    | Intellectual Developmental Disorder, Autosomal Dominant 8 (MRD8)                                                                                                                                                                 | Unknown   | 1.0 | 6.2  |
| <i>GRIN2A†</i> | NM_001134407.3 | Epilepsy, focal, with speech disorder and with or without Intellectual Developmental Disorder, 245570 (3)                                                                                                                        | Uncertain | 1.0 | 2.8  |
| <i>GRIN2B†</i> | NM_000834.5    | Intellectual Developmental Disorder, Autosomal Dominant 6 (MRD6)                                                                                                                                                                 | Yes       | 1.0 | 5.4  |
| <i>GRIN2D†</i> | NM_000836.4    | Epileptic encephalopathy, early infantile, 46, 617162 (3)                                                                                                                                                                        | Unknown   | 1.0 | 4.8  |
| <i>GRM1</i>    | NM_001278064.2 | Spinocerebellar Ataxia, Autosomal Recessive 13 (SCAR13)                                                                                                                                                                          | Unknown   | 0.1 | 2.6  |
| <i>GRM7</i>    | NM_000844.4    | Neurodevelopmental disorder with seizures, hypotonia, and brain imaging abnormalities, 618922 (3)                                                                                                                                | Unknown   | 1.0 | 2.1  |
| <i>GRN</i>     | NM_002087.4    | Ceroid Lipofuscinosis, Neuronal, 11 (CLN11); Frontotemporal Lobar Degeneration with Tdp43 Inclusions, Grn-Related                                                                                                                | Unknown   | 0.1 | 0.3  |
| <i>GSS</i>     | NM_000178.4    | Glutathione Synthetase Deficiency (GSSD); Glutathione Synthetase Deficiency of Erythrocytes, Hemolytic Anemia                                                                                                                    | Unknown   | 0.0 | 0.8  |
| <i>GTPBP2</i>  | NM_019096.5    | Jaberi-Elahi syndrome, 617988 (3)                                                                                                                                                                                                | Unknown   | 0.3 | 3.4  |
| <i>GTPBP3</i>  | NM_032620.4    | Deafness, Aminoglycoside-Induced                                                                                                                                                                                                 | Unknown   | 0.0 | 0.0  |
| <i>GUF1</i>    | NM_021927.3    | Epileptic encephalopathy, early infantile, 40, 617065 (3) mutation identified in 1 EIEE40 family                                                                                                                                 | Unknown   | 0.0 | 0.2  |
| <i>GYS1</i>    | NM_002103.5    | Glycogen Storage Disease 0, Muscle                                                                                                                                                                                               | Unknown   | 0.0 | 1.8  |
| <i>GYS2</i>    | NM_021957.4    | Glycogen Storage Disease 0, Liver                                                                                                                                                                                                | No        | 0.0 | 0.1  |
| <i>HACE1</i>   | NM_020771.4    | Spastic paraplegia and psychomotor retardation with or without seizures, 616756 (3)                                                                                                                                              | Unknown   | 0.0 | 3.6  |
| <i>HADH</i>    | NM_005327.7    | Hyperinsulinemic Hypoglycemia, Familial, 4 (HHF4); 3-Hydroxyacyl-Coa Dehydrogenase Deficiency                                                                                                                                    | Unknown   | 0.0 | 0.5  |
| <i>HAX1</i>    | NM_006118.4    | Neutropenia, Severe Congenital, 3, Autosomal Recessive (SCN3)                                                                                                                                                                    | Unknown   | 0.0 | 0.1  |
| <i>HCCS</i>    | NM_005333.5    | Microphthalmia, Syndromic 7 (MCOPS7)                                                                                                                                                                                             | Yes       | 0.9 | 1.2  |
| <i>HCFC1</i>   | NM_005334.3    | Methylmalonic Acidemia And Homocysteinemia, Cblx Type; Methylmalonic Acidemia and Homocysteinemia, Cblx Type                                                                                                                     | Unknown   | 1.0 | 5.6  |
| <i>HCN1†</i>   | NM_021072.4    | Epileptic encephalopathy, early infantile (3); Generalized epilepsy with febrile seizures plus, type 10, 618482 (3)                                                                                                              | Unknown   | 1.0 | 3.7  |
| <i>HCN2</i>    | NM_001194.4    | Genetic epilepsy with febrile seizures plus; Other seizure disorders                                                                                                                                                             | Unknown   | 0.5 | 3.4  |
| <i>HDAC4†</i>  | NM_001378414.1 | Brachydactyly-Intellectual Developmental Disorder Syndrome (BDMR)                                                                                                                                                                | Uncertain | 1.0 | 2.9  |
| <i>HDAC8</i>   | NM_018486.3    | Wilson-Turner X-Linked Intellectual Developmental Disorder Syndrome (WTS); Cornelia De Lange Syndrome 5 (CDLS5); Wilson-Turner X-Linked Intellectual Developmental Disorder Syndrome (WTS); Cornelia De Lange Syndrome 5 (CDLS5) | Yes       | 1.0 | 2.8  |
| <i>HECW2†</i>  | NM_001348768.2 | Neurodevelopmental disorder with hypotonia, seizures, and absent language, 617268 (3)                                                                                                                                            | Unknown   | 1.0 | 3.3  |
| <i>HEPACAM</i> | NM_152722.5    | Megalencephalic Leukoencephalopathy with Subcortical Cysts 2B, Remitting; Megalencephalic Leukoencephalopathy with Subcortical Cysts 2A (MLC2A)                                                                                  | Unknown   | 0.9 | 1.6  |
| <i>HERC2</i>   | NM_004667.6    | Skin/Hair/Eye Pigmentation, Variation In, 1 (SHEP1); Skin/Hair/Eye Pigmentation, Variation In, 1 (SHEP1)                                                                                                                         | Unknown   | 1.0 | 4.4  |
| <i>HESX1</i>   | NM_003865.3    | Pituitary Hormone Deficiency, Combined, 2 (CPHD2); Septo-optic Dysplasia                                                                                                                                                         | Unknown   | 0.0 | -0.2 |
| <i>HEXA</i>    | NM_000520.6    | Tay-Sachs Disease (TSD)                                                                                                                                                                                                          | Unknown   | 0.0 | -0.4 |
| <i>HEXB</i>    | NM_000521.4    | Sandhoff Disease                                                                                                                                                                                                                 | Unknown   | 0.0 | 0.6  |
| <i>HGSNAT</i>  | NM_152419.3    | Mucopolysaccharidosis Type IIc                                                                                                                                                                                                   | Unknown   | 0.0 | 0.7  |
| <i>HIBCH</i>   | NM_014362.4    | Beta-Hydroxyisobutyryl Coa Deacylase Deficiency                                                                                                                                                                                  | Unknown   | 0.0 | 0.3  |
| <i>HIVEP2†</i> | NM_006734.4    | Intellectual Developmental Disorder, autosomal dominant 43, 616977 (3)                                                                                                                                                           | Yes       | 1.0 | 1.8  |
| <i>HK1</i>     | NM_000188.3    | Neuropathy, Hereditary Motor and Sensory, Russe Type (HMSNR); Hemolytic Anemia, Nonspherocytic, Due To Hexokinase Deficiency                                                                                                     | Unknown   | 0.9 | 3.2  |
| <i>HLCS</i>    | NM_001352514.2 | Holocarboxylase Synthetase Deficiency                                                                                                                                                                                            | No        | 0.0 | 0.1  |

|                 |                |                                                                                                                                                                                                                                                                                                                                                                      |         |     |      |
|-----------------|----------------|----------------------------------------------------------------------------------------------------------------------------------------------------------------------------------------------------------------------------------------------------------------------------------------------------------------------------------------------------------------------|---------|-----|------|
| <i>HMBS†</i>    | NM_000190.4    | Porphyria, Acute Intermittent; Porphyria, Acute Intermittent                                                                                                                                                                                                                                                                                                         | Yes     | 0.9 | 0.6  |
| <i>HMGCL</i>    | NM_000191.3    | 3-Hydroxy-3-Methylglutaryl-Coa Lyase Deficiency (HMGCLD)                                                                                                                                                                                                                                                                                                             | Unknown | 0.0 | 0.5  |
| <i>HMGCS2</i>   | NM_005518.4    | 3-Hydroxy-3-Methylglutaryl-Coa Synthase 2 Deficiency                                                                                                                                                                                                                                                                                                                 | Unknown | 0.0 | -0.2 |
| <i>HNRNPH2</i>  | NM_019597.5    | Intellectual Developmental Disorder, X-linked, syndromic, Bain type, 300986 (3) second signal at 6q25.3-q26, pseudogene                                                                                                                                                                                                                                              | Unknown | 1.0 | 3.6  |
| <i>HNRNPR</i>   | NM_005826.5    | Global developmental delay;Intellectual disability;Seizures;Postnatal microcephaly;Short digit                                                                                                                                                                                                                                                                       | Unknown | 1.0 | 3.5  |
| <i>HNRNPU</i>   | NM_031844.3    | Epileptic encephalopathy, early infantile, 54, 617391 (3)                                                                                                                                                                                                                                                                                                            | Unknown | 1.0 | 3.4  |
| <i>HOXA1</i>    | NM_005522.5    | Bosley-Salih-Alorainy syndrome, 601536 (3); Athabaskan brainstem dysgenesis syndrome, 601536 (3)                                                                                                                                                                                                                                                                     | Unknown | 0.3 | -0.1 |
| <i>HPD</i>      | NM_002150.3    | Tyrosinemia, Type Iii; Hawkinsinuria                                                                                                                                                                                                                                                                                                                                 | Unknown | 0.0 | 0.7  |
| <i>HPRT1</i>    | NM_000194.3    | Kelley-Seegmiller Syndrome; Lesch-Nyhan Syndrome (LNS)                                                                                                                                                                                                                                                                                                               | Yes     | 0.9 | 2.3  |
| <i>HRAS</i>     | NM_005343.4    | Thyroid Carcinoma, Hurthle Cell; Costello Syndrome; Schimmelpenning-Feuerstein-Mims Syndrome (SFM); Bladder Cancer                                                                                                                                                                                                                                                   | Unknown | 0.1 | 1.5  |
| <i>HSD17B10</i> | NM_004493.3    | Intellectual Developmental Disorder, X-Linked 17 (MRX17); 17-Beta-Hydroxysteroid Dehydrogenase X Deficiency; Intellectual Developmental Disorder, X-Linked, Syndromic 10 (MRXS10); Intellectual Developmental Disorder, X-Linked 17 (MRX17); 17-Beta-Hydroxysteroid Dehydrogenase X Deficiency; Intellectual Developmental Disorder, X-Linked, Syndromic 10 (MRXS10) | Unknown | 0.9 | 2.6  |
| <i>HSD17B4</i>  | NM_000414.4    | D-Bifunctional Protein Deficiency; Perrault Syndrome 1 (PRLTS1)                                                                                                                                                                                                                                                                                                      | No      | 0.0 | -0.3 |
| <i>HSPD1</i>    | NM_002156.5    | Leukodystrophy, Hypomyelinating, 4 (HLD4); Spastic Paraplegia 13, Autosomal Dominant (SPG13)                                                                                                                                                                                                                                                                         | Unknown | 1.0 | 2.3  |
| <i>HTRA1</i>    | NM_002775.5    | Macular degeneration, age-related, 7, 610149 (3); Macular degeneration, age-related, neovascular type, 610149 (3); CARASIL syndrome, 600142 (3); Cerebral arteriopathy, autosomal dominant, with subcortical infarcts and leukoencephalopathy, type 2, 616779 (3)                                                                                                    | Unknown | 0.0 | 1.1  |
| <i>HTRA2</i>    | NM_013247.5    | Parkinson disease 13, 610297 (3); 3-methylglutaconic aciduria, type VIII, 617248 (3)                                                                                                                                                                                                                                                                                 | Unknown | 0.0 | 1.7  |
| <i>HUWE1</i>    | NM_031407.7    | Intellectual Developmental Disorder, X-Linked, Syndromic, Turner Type (MRXST); Intellectual Developmental Disorder, X-Linked 17 (MRX17); Intellectual Developmental Disorder, X-Linked, Syndromic, Turner Type (MRXST); Intellectual Developmental Disorder, X-Linked 17 (MRX17)                                                                                     | Unknown | 1.0 | 8.9  |
| <i>HYLS1</i>    | NM_001134793.2 | Hydrolethalus Syndrome 1 (HLS1)                                                                                                                                                                                                                                                                                                                                      | Unknown | 0.0 | 0.2  |
| <i>IBA57</i>    | NM_001010867.4 | Multiple Mitochondrial Dysfunctions Syndrome 3 (MMDS3)                                                                                                                                                                                                                                                                                                               | Unknown | 0.0 | -0.6 |
| <i>IDH2</i>     | NM_002168.4    | D-2-Hydroxyglutaric Aciduria 2                                                                                                                                                                                                                                                                                                                                       | Unknown | 0.9 | 1.3  |
| <i>IDS</i>      | NM_000202.8    | Mucopolysaccharidosis II, 309900 (3) telomeric IDS2 source of inversion in IDS                                                                                                                                                                                                                                                                                       | Yes     | 1.0 | 1.6  |
| <i>IER3IP1</i>  | NM_016097.5    | Microcephaly, Epilepsy, And Diabetes Syndrome (MEDS); Microcephaly, Epilepsy, And Diabetes Syndrome (MEDS)                                                                                                                                                                                                                                                           | Unknown | 0.0 | -0.4 |
| <i>IFIH1†</i>   | NM_022168.4    | Diabetes Mellitus, Insulin-Dependent, 19 (IDDM19)                                                                                                                                                                                                                                                                                                                    | Unknown | 0.0 | -0.8 |
| <i>IFT140</i>   | NM_014714.4    | Mainzer-Saldino Syndrome (MZSDS)                                                                                                                                                                                                                                                                                                                                     | Unknown | 0.0 | -0.8 |
| <i>IKBK</i>     | NM_001099857.5 | Incontinentia pigmenti, 308300                                                                                                                                                                                                                                                                                                                                       | Unknown | 0.1 | 0.0  |
| <i>INPP5E</i>   | NM_019892.6    | Intellectual Developmental Disorder, Truncal Obesity, Retinal Dystrophy, And Micropenis; Joubert Syndrome 1 (JBTS1)                                                                                                                                                                                                                                                  | No      | 0.0 | 0.5  |
| <i>INS</i>      | NM_000207.3    | Maturity-Onset Diabetes Of The Young, Type 10 (MODY10); Diabetes Mellitus, Permanent Neonatal (PNDM); Insulin (INS); Diabetes Mellitus, Insulin-Dependent, 2                                                                                                                                                                                                         | Unknown | 0.3 | 0.9  |
| <i>INSR</i>     | NM_000208.4    | Diabetes Mellitus, Insulin-Resistant, With Acanthosis Nigricans; Hyperinsulinemic Hypoglycemia, Familial, 5 (HHF5); Pineal Hyperplasia, Insulin-Resistant Diabetes Mellitus, And Somatic; Donohue Syndrome; Diabetes Mellitus, Noninsulin-Dependent (NIDDM)                                                                                                          | Unknown | 0.0 | 3.8  |
| <i>IQCB1</i>    | NM_001023570.4 | Senior-Loken Syndrome 5 (SLSN5)                                                                                                                                                                                                                                                                                                                                      | Unknown | 0.0 | 0.3  |
| <i>IQSEC1</i>   | NM_001134382.3 | Intellectual developmental disorder with short stature and behavioral abnormalities, 618687 (3)                                                                                                                                                                                                                                                                      | Unknown | 1.0 | 2.3  |
| <i>IQSEC2</i>   | NM_001111125.3 | Intellectual Developmental Disorder, X-Linked 1 (MRX1); Intellectual Developmental Disorder, X-Linked 1 (MRX1)                                                                                                                                                                                                                                                       | Yes     | 1.0 | 5.2  |
| <i>IRF2BPL</i>  | NM_024496.4    | Neurodevelopmental disorder with regression, abnormal movements, loss of speech, and seizures, 618088 (3)                                                                                                                                                                                                                                                            | Unknown | 0.8 | 0.7  |
| <i>ITGB6</i>    | NM_000888.5    | Amelogenesis imperfecta, type IH, 616221 (3)                                                                                                                                                                                                                                                                                                                         | Unknown | 0.0 | -0.7 |
| <i>ITPA</i>     | NM_033453.4    | Inosine Triphosphatase Deficiency                                                                                                                                                                                                                                                                                                                                    | Unknown | 0.0 | 0.1  |

|                 |                |                                                                                                                                                                                                                            |           |     |      |
|-----------------|----------------|----------------------------------------------------------------------------------------------------------------------------------------------------------------------------------------------------------------------------|-----------|-----|------|
| <i>IVD</i>      | NM_002225.5    | Isovaleric Acidemia (IVA)                                                                                                                                                                                                  | Unknown   | 0.0 | 0.3  |
| <i>JAM3</i>     | NM_032801.5    | Hemorrhagic Destruction of The Brain, Subependymal Calcification,                                                                                                                                                          | No        | 0.0 | -0.9 |
| <i>KANSL1†</i>  | NM_015443.4    | Koolen-De Vries syndrome, 610443 (3)                                                                                                                                                                                       | Yes       | 1.0 | 1.2  |
| <i>KARS</i>     | NM_005548.3    | Charcot-Marie-Tooth Disease, Recessive Intermediate B (CMTRIB)                                                                                                                                                             | No        | 0.0 | -0.7 |
| <i>KAT6A†</i>   | NM_006766.5    | Arboleda-Tham syndrome, 616268 (3)                                                                                                                                                                                         | Yes       | 1.0 | 2.1  |
| <i>KAT6B†</i>   | NM_012330.4    | Genitopatellar Syndrome (GTPTS); Ohdo Syndrome, Sbbys Variant (SBBYSS)                                                                                                                                                     | Yes       | 1.0 | 2.9  |
| <i>KAT8</i>     | NM_032188.3    | Li-Ghorgani-Weisz-Hubshman syndrome, 618974 (3)                                                                                                                                                                            | Unknown   | 0.2 | 3.2  |
| <i>KATNB1</i>   | NM_005886.3    | Lissencephaly 6, with microcephaly, 616212 (3)                                                                                                                                                                             | Unknown   | 0.0 | 1.6  |
| <i>KCNA1†</i>   | NM_000217.3    | Episodic Ataxia, Type 1 (EA1)                                                                                                                                                                                              | Unknown   | 0.1 | 3.3  |
| <i>KCNA2†</i>   | NM_004974.4    | Epileptic encephalopathy, early infantile, 32, 616366 (3)                                                                                                                                                                  | Unknown   | 0.9 | 3.8  |
| <i>KCNB1</i>    | NM_004975.4    | Epileptic encephalopathy, early infantile, 26, 616056 (3)                                                                                                                                                                  | Unknown   | 1.0 | 4.3  |
| <i>KCNC1†</i>   | NM_001112741.2 | Epilepsy, progressive myoclonic 7, 616187 (3)                                                                                                                                                                              | Unknown   | 1.0 | 4.5  |
| <i>KCNC3†</i>   | NM_004977.3    | Spinocerebellar Ataxia 13 (SCA13)                                                                                                                                                                                          | Unknown   | 0.2 | 3.0  |
| <i>KCND2</i>    | NM_012281.3    | epilepsy;autism                                                                                                                                                                                                            | Unknown   | 0.0 | 3.5  |
| <i>KCNE2</i>    | NM_172201.2    | Long QT syndrome 6, 613693 (3); Atrial fibrillation, familial, 4, 611493 (3)                                                                                                                                               | Unknown   | 0.0 | 0.1  |
| <i>KCNH1</i>    | NM_172362.3    | Temple-Baraitser syndrome, 611816 (3); Zimmermann-Laband syndrome 1, 135500 (3)                                                                                                                                            | Unknown   | 0.5 | 3.8  |
| <i>KCNH2†</i>   | NM_000238.4    | Long Qt Syndrome 2 (LQT2); Short Qt Syndrome 1 (SQT1)                                                                                                                                                                      | Yes       | 1.0 | 3.4  |
| <i>KCNH5</i>    | NM_139318.5    | epilepsy                                                                                                                                                                                                                   | Unknown   | 0.0 | 2.5  |
| <i>KCNJ1</i>    | NM_153766.3    | Bartter Syndrome, Antenatal, Type 2                                                                                                                                                                                        | No        | 0.0 | -0.3 |
| <i>KCNJ10</i>   | NM_002241.5    | Seizures, Sensorineural Deafness, Ataxia, Intellectual Developmental Disorder, And                                                                                                                                         | Unknown   | 0.2 | 1.5  |
| <i>KCNJ11</i>   | NM_000525.4    | Diabetes Mellitus, Transient Neonatal, 3; Diabetes Mellitus, Permanent Neonatal (PNDM); Hyperinsulinemic Hypoglycemia, Familial, 2 (HHF2)                                                                                  | Unknown   | 0.0 | 1.6  |
| <i>KCNJ13</i>   | NM_002242.4    | Leber Congenital Amaurosis 16 (LCA16); Vitreoretinal Degeneration, Snowflake Type (SVD)                                                                                                                                    | Unknown   | 0.0 | 1.9  |
| <i>KCNJ6</i>    | NM_002240.5    | Keppen-Lubinsky syndrome, 614098 (3)                                                                                                                                                                                       | Unknown   | 0.5 | 3.7  |
| <i>KCNK4</i>    | NM_033310.3    | Facial dysmorphism, hypertrichosis, epilepsy, intellectual/developmental delay, and gingival overgrowth syndrome, 618381 (3)                                                                                               | Unknown   | 0.0 | 0.8  |
| <i>KCNMA1</i>   | NM_001161352.2 | Generalized Epilepsy and Paroxysmal Dyskinesia (GEPD)                                                                                                                                                                      | Unknown   | 1.0 | 5.1  |
| <i>KCNN3†</i>   | NM_002249.6    | Zimmermann-Laband syndrome 3, 618658 (3)                                                                                                                                                                                   | Unknown   | 1.0 | 3.3  |
| <i>KCNQ1</i>    | NM_000218.3    | Long QT syndrome 1, 192500 (3); Jervell and Lange-Nielsen syndrome, 220400 (3); Atrial fibrillation, familial, 3, 607554 (3); Short QT syndrome 2, 609621 (3); Long QT syndrome 1, acquired, susceptibility to, 192500 (3) | Unknown   | 0.0 | 1.8  |
| <i>KCNQ2†</i>   | NM_172107.4    | Epileptic Encephalopathy, Early Infantile, 7 (EIEE7); Seizures, Benign Familial Neonatal, 1 (BFNS1)                                                                                                                        | Yes       | 1.0 | 4.0  |
| <i>KCNQ3†</i>   | NM_004519.4    | Seizures, benign neonatal, 2, 121201 (3)                                                                                                                                                                                   | Unknown   | 0.8 | 2.1  |
| <i>KCNQ5†</i>   | NM_019842.4    | Intellectual Developmental Disorder, autosomal dominant 46, 617601 (3)                                                                                                                                                     | Unknown   | 1.0 | 3.3  |
| <i>KCNT1†</i>   | NM_020822.3    | Epileptic encephalopathy, early infantile, 14, 614959 (3); Epilepsy, nocturnal frontal lobe, 5, 615005 (3)                                                                                                                 | Unknown   | 0.0 | 2.9  |
| <i>KCNT2†</i>   | NM_198503.5    | Epileptic encephalopathy, early infantile, 57, 617771 (3) mutation identified in 1 EIEE57 patient                                                                                                                          | Unknown   | 0.0 | 3.6  |
| <i>KCTD3</i>    | NM_016121.5    | No OMIM number;Epileptic encephalopathy                                                                                                                                                                                    | Unknown   | 0.1 | 2.8  |
| <i>KCTD7</i>    | NM_153033.5    | Epilepsy, progressive myoclonic 3, with or without intracellular inclusions, 611726 (3)                                                                                                                                    | Unknown   | 0.0 | 1.5  |
| <i>KDM4B†</i>   | NM_015015.3    | Intellectual developmental disorder, autosomal dominant 65                                                                                                                                                                 | Unknown   | 1.0 | 3.5  |
| <i>KDM5B</i>    | NM_006618.5    | Intellectual Developmental Disorder, autosomal recessive 65, 618109 (3)                                                                                                                                                    | Uncertain | 0.0 | 1.8  |
| <i>KDM5C</i>    | NM_004187.5    | Intellectual Developmental Disorder, X-Linked, Syndromic, Claes-Jensen Type (MRXSCJ); Intellectual Developmental Disorder, X-Linked, Syndromic, Claes-Jensen Type (MRXSCJ)                                                 | Yes       | 1.0 | 5.1  |
| <i>KDM6A</i>    | NM_001291415.2 | Kabuki syndrome 2, 300867 (3) UTY also in mouse and man; escapes inactivation                                                                                                                                              | Yes       | 1.0 | 2.9  |
| <i>KDM6B†</i>   | NM_001348716.2 | Neurodevelopmental disorder with coarse facies and mild distal skeletal abnormalities, 618505 (3)                                                                                                                          | Uncertain | 1.0 | 1.3  |
| <i>KIAA0226</i> | NM_014687.4    | Spinocerebellar ataxia, autosomal recessive 15, 615705 (3)                                                                                                                                                                 | Unknown   | 0.0 | 1.5  |
| <i>KIAA0556</i> | NM_015202.5    | Joubert syndrome 26, 616784 (3)                                                                                                                                                                                            | Unknown   | 0.0 | -0.1 |

|                 |                |                                                                                                                                                                                                                                                                                                                                                                                                                                                                                                                                                                                                         |         |     |      |
|-----------------|----------------|---------------------------------------------------------------------------------------------------------------------------------------------------------------------------------------------------------------------------------------------------------------------------------------------------------------------------------------------------------------------------------------------------------------------------------------------------------------------------------------------------------------------------------------------------------------------------------------------------------|---------|-----|------|
| <i>KIAA0586</i> | NM_001329943.3 | Joubert syndrome 23, 616490 (3); Short-rib thoracic dysplasia 14 with polydactyly, 616546 (3)                                                                                                                                                                                                                                                                                                                                                                                                                                                                                                           | Unknown | 0.0 | 0.4  |
| <i>KIAA1109</i> | NM_001384125.1 | Alkuraya-Kucinkas syndrome, 617822 (3)                                                                                                                                                                                                                                                                                                                                                                                                                                                                                                                                                                  | Unknown | 0.0 | 6.0  |
| <i>KIF11†</i>   | NM_004523.4    | Microcephaly with or without Chorioretinopathy, Lymphedema, or Impaired Intellectual Development                                                                                                                                                                                                                                                                                                                                                                                                                                                                                                        | Yes     | 1.0 | 3.3  |
| <i>KIF1A</i>    | NM_001244008.2 | Intellectual Developmental Disorder, Autosomal Dominant 9 (MRD9); Neuropathy, Hereditary Sensory, Type IIC (HSN2C); Spastic Paraplegia 30, Autosomal Recessive (SPG30)                                                                                                                                                                                                                                                                                                                                                                                                                                  | Unknown | 1.0 | 5.2  |
| <i>KIF2A</i>    | NM_001098511.3 | Cortical dysplasia, complex, with other brain malformations 3, 615411 (3)                                                                                                                                                                                                                                                                                                                                                                                                                                                                                                                               | Unknown | 1.0 | 4.0  |
| <i>KIF4A</i>    | NM_012310.5    | Intellectual Developmental Disorder, X-linked 100, 300923 (3) mutation identified in 1 MRX100 family                                                                                                                                                                                                                                                                                                                                                                                                                                                                                                    | Unknown | 1.0 | 2.6  |
| <i>KIF5A†</i>   | NM_004984.4    | Spastic Paraplegia 10, Autosomal Dominant (SPG10)                                                                                                                                                                                                                                                                                                                                                                                                                                                                                                                                                       | Unknown | 1.0 | 3.6  |
| <i>KIF5C</i>    | NM_004522.3    | Cortical dysplasia, complex, with other brain malformations 2, 615282 (3)                                                                                                                                                                                                                                                                                                                                                                                                                                                                                                                               | Unknown | 1.0 | 4.1  |
| <i>KIF7</i>     | NM_198525.3    | Hydrocephalus Syndrome 2 (HLS2); Bardet-Biedl Syndrome (BBS); Acrocallosal Syndrome (ACLS); Pallister-Hall Syndrome (PHS)                                                                                                                                                                                                                                                                                                                                                                                                                                                                               | No      | 0.0 | -0.7 |
| <i>KIFBP</i>    | NM_015634.4    | Goldberg-Shprintzen megacolon syndrome                                                                                                                                                                                                                                                                                                                                                                                                                                                                                                                                                                  | Unknown | N/A | N/A  |
| <i>KIRREL3†</i> | NM_032531.4    | Intellectual Developmental Disorder, Autosomal Dominant 4 (MRD4)                                                                                                                                                                                                                                                                                                                                                                                                                                                                                                                                        | Unknown | 1.0 | 2.4  |
| <i>KLHL15</i>   | NM_030624.3    | Intellectual Developmental Disorder, X-linked 103, 300982 (3)                                                                                                                                                                                                                                                                                                                                                                                                                                                                                                                                           | Unknown | 1.0 | 3.7  |
| <i>KLLN</i>     | NM_001126049.2 | Cowden Syndrome 4 (CWS4)                                                                                                                                                                                                                                                                                                                                                                                                                                                                                                                                                                                | Unknown | 0.0 | -1.0 |
| <i>KMT2A†</i>   | NM_001197104.2 | Hairy Elbows, Short Stature, Facial Dysmorphism, And Developmental; Myeloid/Lymphoid or Mixed Lineage Leukemia Gene (MLL); Hairy Elbows, Short Stature, Facial Dysmorphism, And Developmental; Myeloid/Lymphoid Or Mixed Lineage Leukemia Gene (MLL)                                                                                                                                                                                                                                                                                                                                                    | Yes     | 1.0 | 6.2  |
| <i>KMT2D†</i>   | NM_003482.4    | Kabuki Syndrome 1 (KABUK1)                                                                                                                                                                                                                                                                                                                                                                                                                                                                                                                                                                              | Yes     | 1.0 | 3.7  |
| <i>KMT2E†</i>   | NM_182931.3    | O'Donnell-Luria-Rodan syndrome, 618512 (3)                                                                                                                                                                                                                                                                                                                                                                                                                                                                                                                                                              | Unknown | 1.0 | 1.4  |
| <i>KMT5B</i>    | NM_017635.5    | Intellectual Developmental Disorder, autosomal dominant 51                                                                                                                                                                                                                                                                                                                                                                                                                                                                                                                                              | Unknown | N/A | N/A  |
| <i>KPTN</i>     | NM_007059.4    | Intellectual Developmental Disorder, autosomal recessive 41, 615637 (3)                                                                                                                                                                                                                                                                                                                                                                                                                                                                                                                                 | Unknown | 0.0 | 1.4  |
| <i>KRAS</i>     | NM_004985.5    | Lung cancer, somatic, 211980 (3); Bladder cancer, somatic, 109800 (3); Pancreatic carcinoma, somatic, 260350 (3); Gastric cancer, somatic, 137215 (3); Leukemia, acute myeloid, somatic, 601626 (3); Noonan syndrome 3, 609942 (3); Cardiofaciocutaneous syndrome 2, 615278 (3); Breast cancer, somatic, 114480 (3); Schimmelpenning-Feuerstein-Mims syndrome, somatic mosaic, 163200 (3); RAS-associated autoimmune leukoproliferative disorder, 614470 (3); Arteriovenous malformation of the brain, somatic, 108010 (3); Oculoectodermal syndrome, somatic, 600268 (3) pseudogene KRAS1P on 6p12-p11 | Unknown | 0.0 | 2.3  |
| <i>KRIT1</i>    | NM_194454.3    | Cerebral Cavernous Malformations (CCM)                                                                                                                                                                                                                                                                                                                                                                                                                                                                                                                                                                  | Unknown | 0.0 | 1.4  |
| <i>L1CAM</i>    | NM_001278116.2 | Hydrocephalus Due to Congenital Stenosis Of Aqueduct Of Sylvius (HSAS); Corpus Callosum, Partial Agenesis Of, X-Linked; Masa Syndrome; Hydrocephalus Due To Congenital Stenosis Of Aqueduct Of Sylvius (HSAS); Corpus Callosum, Partial Agenesis Of, X-Linked; Masa Syndrome                                                                                                                                                                                                                                                                                                                            | Yes     | 1.0 | 2.8  |
| <i>L2HGDH</i>   | NM_024884.3    | L-2-Hydroxyglutaric Aciduria                                                                                                                                                                                                                                                                                                                                                                                                                                                                                                                                                                            | Unknown | 0.0 | 0.4  |
| <i>LAMA2</i>    | NM_000426.4    | Muscular Dystrophy, Congenital Merosin-Deficient, 1A (MDC1A)                                                                                                                                                                                                                                                                                                                                                                                                                                                                                                                                            | No      | 0.0 | 0.0  |
| <i>LAMB1</i>    | NM_002291.3    | Lissencephaly 5, 615191 (3)                                                                                                                                                                                                                                                                                                                                                                                                                                                                                                                                                                             | Unknown | 0.0 | 0.5  |
| <i>LAMC3</i>    | NM_006059.4    | Cortical Malformations, Occipital (OCCM)                                                                                                                                                                                                                                                                                                                                                                                                                                                                                                                                                                | Unknown | 0.0 | -0.4 |
| <i>LARGE1</i>   | NM_133642.5    | Muscular dystrophy-dystroglycanopathy (congenital with brain and eye anomalies), type A, 6                                                                                                                                                                                                                                                                                                                                                                                                                                                                                                              | No      | N/A | N/A  |
| <i>LARS</i>     | NM_020117.11   | Infantile liver failure syndrome 1, 615438 (3) mutation identified in 1 family                                                                                                                                                                                                                                                                                                                                                                                                                                                                                                                          | Unknown | 0.0 | 1.5  |
| <i>LARS2</i>    | NM_015340.4    | Perrault Syndrome 4 (PRLTS4)                                                                                                                                                                                                                                                                                                                                                                                                                                                                                                                                                                            | Unknown | 0.0 | 1.3  |
| <i>LBR</i>      | NM_002296.4    | Reynolds Syndrome; Hydrops-Ectopic Calcification-Moth-Eaten Skeletal Dysplasia; Pelger-Huet Anomaly (PHA)                                                                                                                                                                                                                                                                                                                                                                                                                                                                                               | No      | 0.2 | 0.3  |
| <i>LG1†</i>     | NM_005097.4    | Epilepsy, Familial Temporal Lobe, 1 (ETL1)                                                                                                                                                                                                                                                                                                                                                                                                                                                                                                                                                              | Unknown | 1.0 | 2.8  |
| <i>LIAS</i>     | NM_006859.4    | Pyruvate Dehydrogenase Lipoic Acid Synthetase Deficiency (PDHLD)                                                                                                                                                                                                                                                                                                                                                                                                                                                                                                                                        | Unknown | 0.0 | 1.3  |
| <i>LIG4</i>     | NM_206937.2    | Lig4 Syndrome; Severe Combined Immunodeficiency with Sensitivity to Ionizing Radiation                                                                                                                                                                                                                                                                                                                                                                                                                                                                                                                  | No      | 0.0 | 0.2  |
| <i>LIPT1</i>    | NM_145199.3    | Lipoyltransferase 1 deficiency, 616299 (3)                                                                                                                                                                                                                                                                                                                                                                                                                                                                                                                                                              | Unknown | 0.0 | 0.3  |
| <i>LIPT2</i>    | NM_001144869.3 | Encephalopathy, neonatal severe, with lactic acidosis and brain abnormalities, 617668 (3)                                                                                                                                                                                                                                                                                                                                                                                                                                                                                                               | Unknown | 0.6 | -0.1 |

|                |                |                                                                                                                                                                                                                                                                                                                                                                                                      |           |     |      |
|----------------|----------------|------------------------------------------------------------------------------------------------------------------------------------------------------------------------------------------------------------------------------------------------------------------------------------------------------------------------------------------------------------------------------------------------------|-----------|-----|------|
| <i>LMBRD1</i>  | NM_018368.4    | Methylmalonic Aciduria and Homocystinuria, Cblf Type                                                                                                                                                                                                                                                                                                                                                 | Unknown   | 0.0 | 0.3  |
| <i>LMNB2</i>   | NM_032737.4    | Lipodystrophy, Partial, Acquired, Susceptibility To (APLD)                                                                                                                                                                                                                                                                                                                                           | Unknown   | 1.0 | 0.7  |
| <i>LNPK</i>    | NM_030650.3    | Neurodevelopmental disorder with epilepsy and hypoplasia of the corpus callosum                                                                                                                                                                                                                                                                                                                      | Unknown   | N/A | N/A  |
| <i>LONP1</i>   | NM_004793.4    | CODAS syndrome, 600373 (3)                                                                                                                                                                                                                                                                                                                                                                           | Unknown   | 1.0 | 0.4  |
| <i>LRAT</i>    | NM_004744.5    | Leber Congenital Amaurosis 14 (LCA14)                                                                                                                                                                                                                                                                                                                                                                | Unknown   | 0.0 | 0.0  |
| <i>LRP2</i>    | NM_004525.3    | Donnai-Barrow Syndrome                                                                                                                                                                                                                                                                                                                                                                               | No        | 1.0 | 2.1  |
| <i>LRPPRC</i>  | NM_133259.4    | Leigh Syndrome, French Canadian Type (LSFC)                                                                                                                                                                                                                                                                                                                                                          | No        | 0.0 | -1.9 |
| <i>LSS</i>     | NM_002340.6    | Cataract 44, 616509 (3); Hypotrichosis 14, 618275 (3); Alopecia-Intellectual Developmental Disorder syndrome 4, 618840 (3)                                                                                                                                                                                                                                                                           | Unknown   | 0.0 | 0.7  |
| <i>LYST</i>    | NM_000081.4    | Chediak-Higashi Syndrome (CHS)                                                                                                                                                                                                                                                                                                                                                                       | No        | 0.0 | 1.4  |
| <i>MACF1†</i>  | NM_001394062.1 | Lissencephaly 9 with complex brainstem malformation, 618325 (3)                                                                                                                                                                                                                                                                                                                                      | Unknown   | 1.0 | 3.4  |
| <i>MAF†</i>    | NM_005360.5    | Cataract 21, Multiple Types (CTRCT21)                                                                                                                                                                                                                                                                                                                                                                | Unknown   | 0.7 | 1.2  |
| <i>MAFB</i>    | NM_005461.5    | Multicentric Carpotarsal Osteolysis Syndrome (MCTO)                                                                                                                                                                                                                                                                                                                                                  | Unknown   | 0.9 | 2.2  |
| <i>MAGEL2</i>  | NM_019066.5    | Schaaf-Yang syndrome, 615547 (3)                                                                                                                                                                                                                                                                                                                                                                     | Uncertain | 1.0 | -0.6 |
| <i>MAN1B1</i>  | NM_016219.5    | Intellectual Developmental Disorder, Autosomal Recessive 15 (MRT15)                                                                                                                                                                                                                                                                                                                                  | Unknown   | 0.0 | -0.7 |
| <i>MANBA</i>   | NM_005908.4    | Mannosidosis, Beta A, Lysosomal (MANSB)                                                                                                                                                                                                                                                                                                                                                              | Unknown   | 0.0 | 0.0  |
| <i>MAP2K1</i>  | NM_002755.4    | Cardiofaciocutaneous Syndrome 3 (CFC3)                                                                                                                                                                                                                                                                                                                                                               | Unknown   | 0.9 | 3.1  |
| <i>MAPK10†</i> | NM_138982.4    | Epileptic Encephalopathy;EPILEPTIC ENCEPHALOPATHY LENNOX-GASTAUT TYPE                                                                                                                                                                                                                                                                                                                                | Unknown   | 0.3 | 3.0  |
| <i>MAPT</i>    | NM_001377265.1 | Supranuclear Palsy, Progressive, 1 (PSNP1); Frontotemporal Dementia (FTD); Parkinson-Dementia Syndrome; Pick Disease of Brain                                                                                                                                                                                                                                                                        | Unknown   | 0.0 | 1.5  |
| <i>MAST1†</i>  | NM_014975.3    | Mega-corpor-callosum syndrome with cerebellar hypoplasia and cortical malformations, 618273 (3)                                                                                                                                                                                                                                                                                                      | Unknown   | 1.0 | 5.8  |
| <i>MATN4</i>   | NM_001393530.1 | Global developmental delay, holoprosencephaly, microcephaly, lumbosacral myelomeningocele, epilepsy, proptosis, and diabetes insipidus                                                                                                                                                                                                                                                               | Unknown   | 0.0 | 1.1  |
| <i>MBD5†</i>   | NM_001378120.1 | Intellectual Developmental Disorder, Autosomal Dominant 1 (MRD1)                                                                                                                                                                                                                                                                                                                                     | Yes       | 1.0 | 0.9  |
| <i>MBOAT7</i>  | NM_024298.5    | Intellectual Developmental Disorder, autosomal recessive 57, 617188 (3)                                                                                                                                                                                                                                                                                                                              | Unknown   | 0.1 | 0.4  |
| <i>MBTPS2</i>  | NM_015884.4    | Keratosis Follicularis Spinulosa Decalvans, X-Linked (KFSDX); Ifap Syndrome with or without Bresheck Syndrome                                                                                                                                                                                                                                                                                        | Unknown   | 1.0 | 2.1  |
| <i>MC2R</i>    | NM_000529.2    | Glucocorticoid Deficiency 1 (GCCD1)                                                                                                                                                                                                                                                                                                                                                                  | Unknown   | 0.0 | 0.0  |
| <i>MCCC1</i>   | NM_020166.5    | 3-Methylcrotonyl-CoA carboxylase 1 deficiency, 210200 (3)                                                                                                                                                                                                                                                                                                                                            | No        | 0.0 | 0.5  |
| <i>MCCC2</i>   | NM_022132.5    | 3-Methylcrotonyl-Coa Carboxylase 2 Deficiency; 3-Methylcrotonyl-Coa Carboxylase 2 Deficiency                                                                                                                                                                                                                                                                                                         | Unknown   | 0.0 | 0.3  |
| <i>MCPH1</i>   | NM_024596.5    | Microcephaly 1, Primary, Autosomal Recessive (MCPH1)                                                                                                                                                                                                                                                                                                                                                 | Unknown   | 0.0 | -4.8 |
| <i>MDH1</i>    | NM_005917.4    | Epileptic encephalopathy, early infantile, 88, 618959 (3) proximal to APOB; mutation identified in 1 EIEE88 family                                                                                                                                                                                                                                                                                   | Unknown   | 0.9 | 1.2  |
| <i>MDH2</i>    | NM_005918.4    | Epileptic encephalopathy, early infantile, 51, 617339 (3)                                                                                                                                                                                                                                                                                                                                            | Unknown   | 0.0 | 0.0  |
| <i>MECP2</i>   | NM_001110792.2 | Rett syndrome, 312750 (3); Intellectual Developmental Disorder, X-linked, syndromic 13, 300055 (3); Rett syndrome, preserved speech variant, 312750 (3); Encephalopathy, neonatal severe, 300673 (3); Autism susceptibility, X-linked 3, 300496 (3); Intellectual Developmental Disorder, X-linked syndromic, Lubs type, 300260 (3); Rett syndrome, atypical, 312750 (3) 70kb centromeric of RCP/GCP | Unknown   | 0.9 | -1.2 |
| <i>MED12</i>   | NM_005120.3    | Lujan-Fryns Syndrome; Opitz-Kaveggia Syndrome (OKS); Ohdo Syndrome, X-Linked (OHDOX)                                                                                                                                                                                                                                                                                                                 | Unknown   | 1.0 | 6.6  |
| <i>MED13L†</i> | NM_015335.5    | Transposition of the Great Arteries, Dextro-Looped 1 (DTGA1)                                                                                                                                                                                                                                                                                                                                         | Yes       | 1.0 | 3.7  |
| <i>MED17</i>   | NM_004268.5    | Microcephaly, Postnatal Progressive, With Seizures and Brain Atrophy                                                                                                                                                                                                                                                                                                                                 | Unknown   | 0.0 | 0.9  |
| <i>MED23</i>   | NM_004830.4    | Intellectual Developmental Disorder, autosomal recessive 18, 614249 (3)                                                                                                                                                                                                                                                                                                                              | Unknown   | 0.0 | 4.7  |
| <i>MED25</i>   | NM_030973.4    | Charcot-Marie-Tooth Disease, Axonal, Type 2B2 (CMT2B2)                                                                                                                                                                                                                                                                                                                                               | Unknown   | 0.0 | 1.3  |
| <i>MEF2C†</i>  | NM_002397.5    | Intellectual Developmental Disorder, Autosomal Dominant 20 (MRD20)                                                                                                                                                                                                                                                                                                                                   | Yes       | 0.0 | 4.0  |
| <i>MEFV</i>    | NM_000243.3    | Familial Mediterranean Fever (FMF); Familial Mediterranean Fever, Autosomal Dominant                                                                                                                                                                                                                                                                                                                 | Unknown   | 0.0 | -1.7 |
| <i>MEGF10</i>  | NM_001256545.2 | Myopathy, Areflexia, Respiratory Distress, And Dysphagia, Early-Onset                                                                                                                                                                                                                                                                                                                                | Unknown   | 0.4 | 1.0  |
| <i>MEIS2†</i>  | NM_170675.5    | Cleft palate, cardiac defects, and Intellectual Developmental Disorder, 600987 (3)                                                                                                                                                                                                                                                                                                                   | Unknown   | 1.0 | 2.5  |
| <i>METTL23</i> | NM_001080510.5 | Intellectual Developmental Disorder, autosomal recessive 44, 615942 (3)                                                                                                                                                                                                                                                                                                                              | No        | 0.0 | -1.0 |
| <i>MFF</i>     | NM_001277062.2 | Encephalopathy due to defective mitochondrial and peroxisomal fission 2                                                                                                                                                                                                                                                                                                                              | Unknown   | 0.1 | 0.4  |



|                          |                |                                                                                                                                                                                           |         |     |      |
|--------------------------|----------------|-------------------------------------------------------------------------------------------------------------------------------------------------------------------------------------------|---------|-----|------|
| <i>MFSD2A</i>            | NM_032793.5    | Neurodevelopmental disorder with progressive microcephaly, spasticity, and brain imaging abnormalities, 616486 (3)                                                                        | Unknown | 0.0 | 2.0  |
| <i>MFSD8</i>             | NM_001371596.2 | Ceroid Lipofuscinosis, Neuronal, 7 (CLN7)                                                                                                                                                 | No      | 0.0 | 0.1  |
| <i>MGAT2</i>             | NM_002408.4    | Congenital Disorder of Glycosylation, Type Iia (CDG2A)                                                                                                                                    | Unknown | 0.0 | 0.5  |
| <i>MGP</i>               | NM_000900.5    | Keutel Syndrome                                                                                                                                                                           | Unknown | 0.0 | 0.1  |
| <i>MID2</i>              | NM_012216.4    | Intellectual Developmental Disorder, X-linked 101, 300928 (3) mutation identified in 1 MRX101 family                                                                                      | Unknown | 0.2 | 1.6  |
| <i>MKRN3</i>             | NM_005664.4    | Precocious Puberty, Central, 2 (CPPB2)                                                                                                                                                    | Unknown | 0.3 | -0.4 |
| <i>MKS1</i>              | NM_017777.4    | Meckel Syndrome, Type 1 (MKS1); Bardet-Biedl Syndrome (BBS)                                                                                                                               | No      | 0.0 | 0.5  |
| <i>MLC1</i>              | NM_015166.4    | Megalencephalic Leukoencephalopathy with Subcortical Cysts 1 (MLC1)                                                                                                                       | Unknown | 0.0 | 0.2  |
| <i>MLYCD</i>             | NM_012213.3    | Malonyl-Coa Decarboxylase Deficiency                                                                                                                                                      | No      | 0.0 | -1.8 |
| <i>MMAA</i>              | NM_172250.3    | Methylmalonic Aciduria, Cbla Type                                                                                                                                                         | No      | 0.0 | 0.3  |
| <i>MMACHC</i>            | NM_015506.3    | Homocysteinemia; Methylmalonic Aciduria and Homocystinuria, Cblc Type                                                                                                                     | Unknown | 0.0 | -1.1 |
| <i>MMADHC</i>            | NM_015702.3    | Methylmalonic Aciduria and Homocystinuria, CblD Type                                                                                                                                      | No      | 0.0 | -0.4 |
| <i>MN1</i>               | NM_002430.3    | Meningioma, Familial, Susceptibility To                                                                                                                                                   | Unknown | 1.0 | 2.2  |
| <i>MOCS1</i>             | NM_001358530.2 | Molybdenum Cofactor Deficiency, Complementation Group A (MOCODA)                                                                                                                          | Unknown | 0.0 | -0.6 |
| <i>MOCS2</i>             | NM_004531.5    | Molybdenum Cofactor Deficiency, Complementation Group A (MOCODA)                                                                                                                          | No      | 0.0 | -0.1 |
| <i>MOGS</i>              | NM_006302.3    | Congenital Disorder of Glycosylation, Type Iib (CDG2B)                                                                                                                                    | Unknown | 0.0 | 0.7  |
| <i>MPC1</i>              | NM_016098.4    | Mitochondrial Pyruvate Carrier Deficiency (MPYCD)                                                                                                                                         | Unknown | 0.0 | 1.1  |
| <i>MPDU1</i>             | NM_004870.4    | Congenital Disorder of Glycosylation, Type If (CDG1F)                                                                                                                                     | Unknown | 0.0 | 0.4  |
| <i>MPDZ</i>              | NM_001378778.1 | Hydrocephalus, Nonsyndromic, Autosomal Recessive 2 (HYC2)                                                                                                                                 | No      | 0.0 | -3.0 |
| <i>MRAP</i>              | NM_001379228.1 | Glucocorticoid Deficiency 2 (GCCD2)                                                                                                                                                       | Unknown | 0.0 | -0.1 |
| <i>MRPS22</i>            | NM_020191.4    | Combined Oxidative Phosphorylation Deficiency 5 (COXPD5)                                                                                                                                  | Unknown | 0.0 | 0.1  |
| <i>MSX2</i>              | NM_002449.5    | Craniosynostosis 2 (CRS2); Parietal Foramina with Cleidocranial Dysplasia (PFMCCD); Parietal Foramina (PFM)                                                                               | Unknown | 0.3 | 0.5  |
| <i>MTFMT</i>             | NM_139242.4    | Combined Oxidative Phosphorylation Deficiency 15 (COXPD15); Leigh Syndrome (LS)                                                                                                           | No      | 0.0 | -0.5 |
| <i>MTHFR</i>             | NM_005957.5    | Homocysteinemia; Neural Tube Defects, Folate-Sensitive; Stroke, Ischemic; Homocystinuria Due to Deficiency of N(5,10)-Methylenetetrahydrofolate                                           | Unknown | 0.0 | 0.9  |
| <i>MTHFS</i>             | NM_006441.4    | Neurodevelopmental disorder with microcephaly, epilepsy, and hypomyelination, 618367 (3)                                                                                                  | Unknown | 0.0 | 0.6  |
| <i>MTM1</i>              | NM_000252.3    | Myopathy, Centronuclear, X-Linked (CNMX); Myopathy, Centronuclear, X-Linked (CNMX)                                                                                                        | Yes     | 1.0 | 2.4  |
| <i>MTO1</i>              | NM_012123.4    | Combined Oxidative Phosphorylation Deficiency 10 (COXPD10)                                                                                                                                | No      | 0.0 | 0.6  |
| <i>MTOR</i>              | NM_004958.4    | Smith-Kingsmore syndrome, 616638 (3); Focal cortical dysplasia, type II, somatic, 607341 (3)                                                                                              | Unknown | 1.0 | 7.0  |
| <i>MTR</i>               | NM_000254.3    | Homocysteinemia; Neural Tube Defects, Folate-Sensitive; Homocystinuria-Megaloblastic Anemia, Cblg Complementation Type (HMAg)                                                             | No      | 0.0 | 2.0  |
| <i>MTRR</i>              | NM_002454.3    | Neural Tube Defects, Folate-Sensitive; Homocystinuria-Megaloblastic Anemia, CblE Complementation Type (HMAE)                                                                              | No      | 0.0 | -0.7 |
| <i>MVK</i>               | NM_000431.4    | Mevalonic Aciduria (MEVA); Hyper-Igd Syndrome (HIDS)                                                                                                                                      | Unknown | 0.2 | 0.9  |
| <i>MYH3<sup>†</sup></i>  | NM_002470.4    | Arthrogryposis, Distal, Type 2B (DA2B); Arthrogryposis, Distal, Type 2A (DA2A)                                                                                                            | Unknown | 0.0 | 1.7  |
| <i>MYO5A</i>             | NM_001382347.1 | Griscelli Syndrome, Type 3 (GS3); Elejalde Disease; Griscelli Syndrome, Type 1 (GS1)                                                                                                      | No      | 0.9 | 3.1  |
| <i>MYT1L<sup>†</sup></i> | NM_001303052.2 | Intellectual Developmental Disorder, autosomal dominant 39, 616521 (3)                                                                                                                    | Yes     | 1.0 | 4.8  |
| <i>NAA10</i>             | NM_003491.4    | Ogden Syndrome (OGDNS); Ogden Syndrome (OGDNS)                                                                                                                                            | Unknown | 0.8 | 2.4  |
| <i>NACC1<sup>†</sup></i> | NM_052876.4    | Neurodevelopmental disorder with epilepsy, cataracts, feeding difficulties, and delayed brain myelination, 617393 (3)                                                                     | Unknown | 1.0 | 4.2  |
| <i>NADK2</i>             | NM_001085411.3 | 2,4-dienoyl-CoA reductase deficiency, 616034 (3)                                                                                                                                          | Unknown | 0.1 | 2.0  |
| <i>NAGA</i>              | NM_000262.3    | Kanzaki Disease; Schindler Disease, Type I                                                                                                                                                | Unknown | 0.0 | 0.2  |
| <i>NAGLU</i>             | NM_000263.4    | Mucopolysaccharidosis Type Iiib                                                                                                                                                           | Unknown | 0.0 | 1.0  |
| <i>NAGS</i>              | NM_153006.3    | N-Acetylglutamate Synthase Deficiency                                                                                                                                                     | Unknown | 0.0 | 1.3  |
| <i>NALCN</i>             | NM_052867.4    | Hypotonia, infantile, with psychomotor retardation and characteristic facies 1, 615419 (3); Congenital contractures of the limbs and face, hypotonia, and developmental delay, 616266 (3) | Unknown | 0.0 | 5.0  |

|          |                |                                                                                                                                                                                                       |         |     |      |
|----------|----------------|-------------------------------------------------------------------------------------------------------------------------------------------------------------------------------------------------------|---------|-----|------|
| NARS2    | NM_024678.6    | Combined oxidative phosphorylation deficiency 24, 616239 (3); Deafness, autosomal recessive 94, 618434 (3) mutation identified in 1 DFNB94 family                                                     | Unknown | 0.0 | -0.8 |
| NAT8L    | NM_178557.4    | N-Acetylaspartate Deficiency (NACED)                                                                                                                                                                  | No      | 0.9 | 2.1  |
| NBEA†    | NM_001385012.1 | Neurodevelopmental disorder with or without early-onset generalized epilepsy                                                                                                                          | Yes     | 1.0 | 5.5  |
| NDE1     | NM_017668.3    | Lissencephaly 4 (LIS4)                                                                                                                                                                                | No      | 0.0 | -1.1 |
| NDN      | NM_002487.3    | Prader-Willi Syndrome (PWS)                                                                                                                                                                           | Unknown | 0.7 | 0.7  |
| NDP      | NM_000266.4    | Norrie Disease (ND); Exudative Vitreoretinopathy 2, X-Linked (EVR2)                                                                                                                                   | Yes     | 0.7 | 1.0  |
| NDST1    | NM_001543.5    | Intellectual Developmental Disorder, autosomal recessive 46, 616116 (3)                                                                                                                               | Unknown | 1.0 | 2.9  |
| NDUFA1   | NM_004541.4    | Mitochondrial Complex I Deficiency                                                                                                                                                                    | Unknown | 0.6 | 1.0  |
| NDUFA10  | NM_004544.4    | Mitochondrial complex I deficiency, nuclear type 22, 618243 (3)                                                                                                                                       | No      | 0.0 | -0.4 |
| NDUFA11  | NM_175614.5    | Mitochondrial Complex I Deficiency                                                                                                                                                                    | Unknown | 0.0 | 0.5  |
| NDUFA12  | NM_018838.5    | Leigh Syndrome (LS)                                                                                                                                                                                   | Unknown | 0.0 | 0.0  |
| NDUFA2   | NM_002488.5    | Mitochondrial complex I deficiency, nuclear type 13, 618235 (3)                                                                                                                                       | Unknown | 0.8 | -0.2 |
| NDUFA4   | NM_002489.4    | Mitochondrial complex IV deficiency, nuclear type 21                                                                                                                                                  | Unknown | 0.0 | 0.0  |
| NDUFA9   | NM_005002.5    | Mitochondrial complex I deficiency, nuclear type 26, 618247 (3)                                                                                                                                       | Unknown | 0.0 | 0.1  |
| NDUFAF2  | NM_174889.5    | Mitochondrial Complex I Deficiency                                                                                                                                                                    | No      | 0.0 | -0.1 |
| NDUFAF3  | NM_199069.2    | Mitochondrial complex I deficiency, nuclear type 18, 618240 (3)                                                                                                                                       | Unknown | 0.0 | -0.5 |
| NDUFAF4  | NM_014165.4    | Mitochondrial Complex I Deficiency                                                                                                                                                                    | Unknown | 0.6 | 0.1  |
| NDUFAF5  | NM_024120.5    | Leigh Syndrome (LS); Mitochondrial Complex I Deficiency                                                                                                                                               | No      | 0.0 | 0.2  |
| NDUFAF6  | NM_152416.4    | Mitochondrial Complex I Deficiency                                                                                                                                                                    | Unknown | 0.0 | 0.6  |
| NDUFB11  | NM_001135998.3 | Linear skin defects with multiple congenital anomalies 3, 300952 (3); Mitochondrial complex I deficiency, nuclear type 30, 301021 (3) mutation identified in 1 MC1DN30 patient                        | Unknown | 0.8 | 0.5  |
| NDUFS1   | NM_005006.7    | Mitochondrial Complex I Deficiency                                                                                                                                                                    | Unknown | 0.0 | -0.1 |
| NDUFS2   | NM_001377299.1 | Mitochondrial Complex I Deficiency                                                                                                                                                                    | Unknown | 0.0 | 1.5  |
| NDUFS3   | NM_004551.3    | Mitochondrial complex I deficiency, nuclear type 8, 618230 (3)                                                                                                                                        | Unknown | 0.0 | 0.0  |
| NDUFS4   | NM_002495.4    | Mitochondrial Complex I Deficiency                                                                                                                                                                    | Unknown | 0.0 | -0.8 |
| NDUFS6   | NM_004553.6    | Mitochondrial complex I deficiency, nuclear type 9, 618232 (3)                                                                                                                                        | No      | 0.1 | -0.2 |
| NDUFS7   | NM_024407.5    | Leigh Syndrome (LS); Mitochondrial Complex I Deficiency                                                                                                                                               | No      | 0.9 | 1.0  |
| NDUFS8   | NM_002496.4    | Leigh Syndrome (LS)                                                                                                                                                                                   | No      | 0.2 | 0.7  |
| NDUFV1   | NM_007103.4    | Leigh Syndrome (LS); Mitochondrial Complex I Deficiency                                                                                                                                               | No      | 0.0 | 0.3  |
| NDUFV2   | NM_021074.5    | Mitochondrial complex I deficiency, nuclear type 7, 618229 (3) pseudogene on 19q13.3-qter                                                                                                             | No      | 0.0 | -0.6 |
| NECAP1   | NM_015509.4    | Epileptic encephalopathy, early infantile, 21, 615833 (3)                                                                                                                                             | Unknown | 0.1 | 1.4  |
| NEDD4L†  | NM_001144967.3 | Periventricular nodular heterotopia 7, 617201 (3)                                                                                                                                                     | Unknown | 1.0 | 3.7  |
| NEK9     | NM_033116.6    | Lethal congenital contracture syndrome 10, 617022 (3); Arthrogyrosis, Perthes disease, and upward gaze palsy, 614262 (3); Nevus comedonicus, somatic, 617025 (3) mutation identified in 1 APUG family | Unknown | 0.0 | 2.5  |
| NEU1     | NM_000434.4    | Neuraminidase Deficiency; Neuraminidase Deficiency; Neuraminidase Deficiency; Neuraminidase Deficiency; Neuraminidase Deficiency; Neuraminidase Deficiency; Neuraminidase Deficiency                  | Unknown | 0.0 | 1.4  |
| NEUROD2† | NM_006160.4    | Epileptic encephalopathy, early infantile, 72, 618374 (3)                                                                                                                                             | Unknown | 0.9 | 2.7  |
| NEXMIF   | NM_001008537.3 | Intellectual Developmental Disorder, X-linked 98                                                                                                                                                      | Yes     | N/A | N/A  |
| NF1†     | NM_001042492.3 | Juvenile Myelomonocytic Leukemia (JMML); Neurofibromatosis-Noonan Syndrome (NFNS); Watson Syndrome; Neurofibromatosis, Familial Spinal; Neurofibromatosis, Type I (NF1); Colorectal Cancer (CRC)      | Yes     | 0.9 | 6.5  |
| NFIA     | NM_001134673.4 | Brain malformations with or without urinary tract defects, 613735 (3)                                                                                                                                 | Yes     | 1.0 | 3.2  |
| NFIX†    | NM_001365902.3 | Sotos Syndrome 2 (SOTOS2); Marshall-Smith Syndrome (MRSHSS)                                                                                                                                           | Unknown | 1.0 | 4.1  |
| NGLY1    | NM_018297.4    | Congenital Disorder of Glycosylation, Type Iv (CDG1V)                                                                                                                                                 | No      | 0.0 | -0.1 |
| NHLRC1   | NM_198586.3    | Myoclonic Epilepsy of Lafora                                                                                                                                                                          | Unknown | 0.1 | 0.5  |
| NID1     | NM_002508.3    | Hydrocephalus, focal epilepsy and hemiparesis                                                                                                                                                         | Unknown | 0.0 | 0.5  |
| NIN      | NM_020921.4    | Seckel Syndrome 7 (SCKL7)                                                                                                                                                                             | Unknown | 0.0 | 0.3  |

|                 |                |                                                                                                                                                                                                                                     |           |     |      |
|-----------------|----------------|-------------------------------------------------------------------------------------------------------------------------------------------------------------------------------------------------------------------------------------|-----------|-----|------|
| <i>NIPA1</i>    | NM_144599.5    | Spastic Paraplegia 6, Autosomal Dominant (SPG6)                                                                                                                                                                                     | Unknown   | 0.0 | 1.9  |
| <i>NIPBL</i>    | NM_133433.4    | Cornelia De Lange Syndrome 1 (CDLS1)                                                                                                                                                                                                | Yes       | 1.0 | 5.6  |
| <i>NLGN4X</i>   | NM_181332.3    | Asperger Syndrome, X-Linked, Susceptibility To, 2 (ASPGX2); Autism, Susceptibility To, X-Linked 2 (AUTSX2)                                                                                                                          | Unknown   | 1.0 | 2.7  |
| <i>NNT</i>      | NM_182977.3    | Glucocorticoid Deficiency 4 (GCCD4)                                                                                                                                                                                                 | Unknown   | 1.0 | 2.1  |
| <i>NODAL</i>    | NM_018055.5    | Heterotaxy, Visceral, 5, Autosomal (HTX5)                                                                                                                                                                                           | Uncertain | 1.0 | 1.0  |
| <i>NOTCH3†</i>  | NM_000435.3    | Myofibromatosis, Infantile, 2 (IMF2); Cerebral Arteriopathy, Autosomal Dominant, With Subcortical Infarcts                                                                                                                          | Unknown   | 0.4 | 3.5  |
| <i>NPC1</i>     | NM_000271.5    | Niemann-Pick Disease, Type C1 (NPC1)                                                                                                                                                                                                | Unknown   | 0.0 | 1.1  |
| <i>NPC2</i>     | NM_006432.5    | Niemann-Pick Disease, Type C2                                                                                                                                                                                                       | Unknown   | 0.0 | 1.3  |
| <i>NPHP1</i>    | NM_001128178.3 | Joubert Syndrome 4 (JBTS4); Senior-Loken Syndrome 1 (SLSN1); Nephronophthisis 1 (NPHP1)                                                                                                                                             | No        | 0.0 | 0.2  |
| <i>NPRL2†</i>   | NM_006545.5    | Epilepsy, familial focal, with variable foci 2, 617116 (3)                                                                                                                                                                          | Unknown   | 0.4 | 1.6  |
| <i>NPRL3†</i>   | NM_001077350.3 | Epilepsy, familial focal, with variable foci 3, 617118 (3)                                                                                                                                                                          | Unknown   | 0.2 | 1.8  |
| <i>NR2F1</i>    | NM_005654.6    | Bosch-Boonstra-Schaaf optic atrophy syndrome, 615722 (3)                                                                                                                                                                            | Unknown   | 1.0 | 4.2  |
| <i>NRAS</i>     | NM_002524.5    | Autoimmune Lymphoproliferative Syndrome, Type Iv (ALPS4); Noonan Syndrome 6 (NS6); Juvenile Myelomonocytic Leukemia (JMML)                                                                                                          | Unknown   | 0.5 | 1.7  |
| <i>NRROS</i>    | NM_198565.3    | Seizures, early-onset, with neurodegeneration and brain calcification, 618875 (3)                                                                                                                                                   | Unknown   | 0.3 | 0.9  |
| <i>NRXN1†</i>   | NM_001330078.2 | Pitt-Hopkins-like syndrome 2, 614325 (3); Schizophrenia, susceptibility to, 17, 614332 (3)                                                                                                                                          | Yes       | 1.0 | 2.6  |
| <i>NSD1†</i>    | NM_022455.5    | Beckwith-Wiedemann Syndrome (BWS); Sotos Syndrome 1 (SOTOS1)                                                                                                                                                                        | Yes       | 1.0 | 3.4  |
| <i>NSDHL</i>    | NM_015922.3    | Congenital Hemidysplasia with Ichthyosiform Erythroderma And Limb; Ck Syndrome; Congenital Hemidysplasia with Ichthyosiform Erythroderma And Limb; Ck Syndrome                                                                      | Yes       | 1.0 | 0.9  |
| <i>NSF</i>      | NM_006178.4    | Seizures; EEG with burst suppression; Global developmental delay; Intellectual disability                                                                                                                                           | Unknown   | 0.0 | 2.6  |
| <i>NSUN2</i>    | NM_017755.6    | Intellectual Developmental Disorder, Autosomal Recessive 5 (MRT5)                                                                                                                                                                   | Unknown   | 0.0 | 0.0  |
| <i>NTRK2†</i>   | NM_006180.6    | Obesity, hyperphagia, and developmental delay, 613886 (3); Epileptic encephalopathy, early infantile, 58, 617830 (3)                                                                                                                | Unknown   | 1.0 | 3.7  |
| <i>NUBPL</i>    | NM_025152.3    | Mitochondrial Complex I Deficiency                                                                                                                                                                                                  | Unknown   | 0.0 | 0.3  |
| <i>NUP214</i>   | NM_005085.4    | Leukemia, acute myeloid, somatic, 601626 (3); Leukemia, T-cell acute lymphoblastic, somatic, 613065 (3); Encephalopathy, acute, infection-induced, susceptibility to, 9, 618426 (3) fused with DEK in AML; fused with ABL1 in T-ALL | Unknown   | 0.1 | 0.7  |
| <i>NUS1</i>     | NM_138459.5    | Congenital disorder of glycosylation, type 1aa, 617082 (3); Intellectual Developmental Disorder, autosomal dominant 55, with seizures, 617831 (3) mutation identified in 1 CDG1AA family                                            | Unknown   | 1.0 | 0.9  |
| <i>OCLN</i>     | NM_001205254.2 | Band-Like Calcification with Simplified Gyration and Polymicrogyria; Band-Like Calcification With Simplified Gyration And Polymicrogyria                                                                                            | Unknown   | 0.0 | 0.3  |
| <i>OCRL</i>     | NM_000276.4    | Low Oculocerebrorenal Syndrome (OCRL); Dent Disease 2                                                                                                                                                                               | Yes       | 1.0 | 3.0  |
| <i>OFD1</i>     | NM_003611.3    | Orofaciodigital syndrome I, 311200 (3); Simpson-Golabi-Behmel syndrome, type 2, 300209 (3); Joubert syndrome 10, 300804 (3); Retinitis pigmentosa 23, 300424 (3) mutation identified in 1 RP23 family                               | Yes       | 1.0 | 0.3  |
| <i>OPA1†</i>    | NM_130837.3    | Optic Atrophy 1 (OPA1); Optic Atrophy with Or Without Deafness, Ophthalmoplegia, Myopathy,                                                                                                                                          | Unknown   | 1.0 | 2.0  |
| <i>OPHN1</i>    | NM_002547.3    | Intellectual Developmental Disorder, X-Linked, With Cerebellar Hypoplasia and Distinctive                                                                                                                                           | Yes       | 1.0 | 2.6  |
| <i>OTC</i>      | NM_000531.6    | Ornithine Transcarbamylase Deficiency, Hyperammonemia Due To                                                                                                                                                                        | Yes       | 0.9 | 1.3  |
| <i>OTUD6B</i>   | NM_016023.5    | Intellectual developmental disorder with dysmorphic facies, seizures, and distal limb anomalies, 617452 (3)                                                                                                                         | Unknown   | 0.0 | 0.3  |
| <i>OTX2†</i>    | NM_021728.4    | Pituitary Hormone Deficiency, Combined, 6 (CPHD6); Microphthalmia, Syndromic 5 (MCOPS5)                                                                                                                                             | Yes       | 0.9 | 1.0  |
| <i>OXR1</i>     | NM_001198533.2 | Cerebellar hypoplasia/atrophy, epilepsy, and global developmental delay, 213000 (3)                                                                                                                                                 | Unknown   | 0.8 | 1.0  |
| <i>P4HTM</i>    | NM_177939.3    | Hypotonia, hypoventilation, impaired intellectual development, dysautonomia, epilepsy, and eye abnormalities, 618493 (3)                                                                                                            | Unknown   | 0.0 | 1.5  |
| <i>PACS1†</i>   | NM_018026.4    | Intellectual Developmental Disorder, Autosomal Dominant 17 (MRD17)                                                                                                                                                                  | Unknown   | 1.0 | 3.7  |
| <i>PACS2†</i>   | NM_001100913.3 | Epileptic encephalopathy, early infantile, 66, 618067 (3)                                                                                                                                                                           | Unknown   | 1.0 | 2.2  |
| <i>PAFAH1B1</i> | NM_000430.4    | Lissencephaly 1, 607432 (3); Subcortical laminar heterotopia, 607432 (3)                                                                                                                                                            | Unknown   | 1.0 | 3.5  |
| <i>PAH</i>      | NM_000277.3    | Phenylketonuria (PKU)                                                                                                                                                                                                               | No        | 0.0 | -0.6 |

|                |                |                                                                                                                                                                                                                           |         |     |      |
|----------------|----------------|---------------------------------------------------------------------------------------------------------------------------------------------------------------------------------------------------------------------------|---------|-----|------|
| <i>PAK1†</i>   | NM_002576.5    | Intellectual developmental disorder with macrocephaly, seizures, and speech delay, 618158 (3)                                                                                                                             | Unknown | 0.0 | 4.0  |
| <i>PAK3</i>    | NM_002578.5    | Intellectual Developmental Disorder, X-Linked 30 (MRX30)                                                                                                                                                                  | Unknown | 1.0 | 3.5  |
| <i>PANK2</i>   | NM_001386393.1 | Hypoprebetalipoproteinemia, Acanthocytosis, Retinitis Pigmentosa; Neurodegeneration With Brain Iron Accumulation 1 (NBIA1)                                                                                                | Unknown | 0.0 | 0.2  |
| <i>PARS2</i>   | NM_152268.4    | Epileptic encephalopathy, early infantile, 75, 618437 (3)                                                                                                                                                                 | Unknown | 0.0 | 0.3  |
| <i>PC</i>      | NM_001040716.2 | Pyruvate Carboxylase Deficiency                                                                                                                                                                                           | Unknown | 0.0 | 3.1  |
| <i>PCCA</i>    | NM_000282.4    | Propionic Acidemia                                                                                                                                                                                                        | No      | 0.0 | 0.2  |
| <i>PCCB</i>    | NM_000532.5    | Propionic Acidemia                                                                                                                                                                                                        | Unknown | 0.0 | -0.9 |
| <i>PCDH12</i>  | NM_016580.4    | Diencephalic-mesencephalic junction dysplasia syndrome 1, 251280 (3)                                                                                                                                                      | Unknown | 0.0 | 0.8  |
| <i>PCDH19</i>  | NM_001184880.2 | Epileptic Encephalopathy, Early Infantile, 9 (EIEE9)                                                                                                                                                                      | Yes     | 1.0 | 2.6  |
| <i>PCDHB4</i>  | NM_018938.4    | Intellectual disability, microcephaly and epilepsy                                                                                                                                                                        | Unknown | 0.0 | -0.3 |
| <i>PCK1</i>    | NM_002591.4    | Phosphoenolpyruvate carboxykinase deficiency, cytosolic, 261680 (3) mutation identified in 1 PCKDC family                                                                                                                 | Unknown | 0.0 | 0.0  |
| <i>PCLO</i>    | NM_033026.6    | Pontocerebellar hypoplasia, type 3, 608027 (3) mutation identified in 1 PCHD3 family                                                                                                                                      | Unknown | 1.0 | -1.5 |
| <i>PCNT</i>    | NM_006031.6    | Microcephalic Osteodysplastic Primordial Dwarfism, Type II (MOPD2)                                                                                                                                                        | Unknown | 0.0 | -1.7 |
| <i>PCSK1</i>   | NM_000439.5    | Body Mass Index Quantitative Trait Locus 12 (BMIQ12); Proprotein Convertase 1/3 Deficiency                                                                                                                                | Unknown | 0.0 | 1.5  |
| <i>PCYT2</i>   | NM_002861.5    | Spastic paraplegia 82, autosomal recessive, 618770 (3)                                                                                                                                                                    | Unknown | 0.0 | 1.7  |
| <i>PDCD10†</i> | NM_007217.4    | Cerebral Cavemous Malformations 3 (CCM3)                                                                                                                                                                                  | Unknown | 1.0 | 1.4  |
| <i>PDE6D</i>   | NM_002601.4    | Joubert syndrome 22, 615665 (3) mutation identified in 1 JBTS22 family                                                                                                                                                    | Unknown | 0.0 | 1.6  |
| <i>PDGFB</i>   | NM_002608.4    | Dermatofibrosarcoma Protuberans (DFSP)                                                                                                                                                                                    | Unknown | 0.8 | 1.1  |
| <i>PDGFRB</i>  | NM_002609.4    | Basal Ganglia Calcification, Idiopathic, 4 (IBGC4); Juvenile Myelomonocytic Leukemia (JMML); Leukemia, Acute Myeloid (AML); Myofibromatosis, Infantile, 1 (IMF1); Myeloproliferative Disorder, Chronic, With Eosinophilia | Unknown | 0.9 | 1.8  |
| <i>PDHA1</i>   | NM_000284.4    | Pyruvate Dehydrogenase E1-Alpha Deficiency (PDHAD); Leigh Syndrome, X-Linked                                                                                                                                              | Yes     | 1.0 | 2.6  |
| <i>PDHB</i>    | NM_000925.4    | Pyruvate Dehydrogenase E1-Beta Deficiency (PDHBD)                                                                                                                                                                         | Unknown | 0.2 | 1.6  |
| <i>PDHX</i>    | NM_003477.3    | Pyruvate Dehydrogenase E3-Binding Protein Deficiency (PDHXD)                                                                                                                                                              | Unknown | 0.0 | -0.2 |
| <i>PDP1</i>    | NM_018444.4    | Pyruvate Dehydrogenase Phosphatase Deficiency (PDHPD)                                                                                                                                                                     | Unknown | 0.5 | 1.6  |
| <i>PDSS2</i>   | NM_020381.4    | Coenzyme Q10 deficiency, primary, 3, 614652 (3)                                                                                                                                                                           | Unknown | 0.0 | 0.5  |
| <i>PET100</i>  | NM_001171155.2 | Mitochondrial complex IV deficiency, 220110 (3)                                                                                                                                                                           | Unknown | 0.0 | 0.2  |
| <i>PEX1</i>    | NM_000466.3    | Peroxisome Biogenesis Disorder 1B (PBD1B); Peroxisome Biogenesis Disorder 1A (Zellweger) (PBD1A)                                                                                                                          | Unknown | 0.0 | 1.1  |
| <i>PEX10</i>   | NM_002617.4    | Peroxisome Biogenesis Disorder 6B (PBD6B); Peroxisome Biogenesis Disorder 6A (Zellweger) (PBD6A)                                                                                                                          | Unknown | 0.0 | -0.3 |
| <i>PEX11B</i>  | NM_003846.3    | Peroxisome Biogenesis Disorder 14B (PEX14B); Peroxisome Biogenesis Disorder 14B (PEX14B)                                                                                                                                  | No      | 0.0 | -0.3 |
| <i>PEX12</i>   | NM_000286.3    | Peroxisome Biogenesis Disorder 3A (Zellweger) (PBD3A); Peroxisome Biogenesis Disorder 3B (PBD3B)                                                                                                                          | Unknown | 0.0 | 0.5  |
| <i>PEX13</i>   | NM_002618.4    | Peroxisome Biogenesis Disorder 11B (PBD11B); Peroxisome Biogenesis Disorder 11A (Zellweger) (PBD11A)                                                                                                                      | Unknown | 0.0 | -0.3 |
| <i>PEX14</i>   | NM_004565.3    | Peroxisome Biogenesis Disorder 13A (Zellweger) (PBD13A)                                                                                                                                                                   | No      | 0.2 | 1.3  |
| <i>PEX16</i>   | NM_004813.4    | Peroxisome Biogenesis Disorder 8B (PBD8B); Peroxisome Biogenesis Disorder 8A (Zellweger) (PBD8A)                                                                                                                          | No      | 0.0 | 0.5  |
| <i>PEX19</i>   | NM_002857.4    | Peroxisome Biogenesis Disorder 12A (Zellweger) (PBD12A)                                                                                                                                                                   | Unknown | 0.0 | -0.8 |
| <i>PEX2</i>    | NM_000318.3    | Peroxisome Biogenesis Disorder 5B (PBD5B); Peroxisome Biogenesis Disorder 5A (Zellweger) (PBD5A)                                                                                                                          | Unknown | 0.0 | 0.0  |
| <i>PEX26</i>   | NM_001127649.3 | Peroxisome Biogenesis Disorder 7B (PBD7B); Peroxisome Biogenesis Disorder 7A (Zellweger) (PBD7A)                                                                                                                          | No      | 0.9 | -0.4 |
| <i>PEX3</i>    | NM_003630.3    | Peroxisome Biogenesis Disorder 10A (Zellweger) (PBD10A)                                                                                                                                                                   | No      | 0.0 | 1.2  |
| <i>PEX5</i>    | NM_001351132.2 | Peroxisome Biogenesis Disorder 2A (Zellweger) (PBD2A); Peroxisome Biogenesis Disorder 2B (PBD2B)                                                                                                                          | Unknown | 0.0 | 0.7  |
| <i>PEX6</i>    | NM_000287.4    | Peroxisome Biogenesis Disorder 4B (PBD4B); Peroxisome Biogenesis Disorder 4A (Zellweger) (PBD4A)                                                                                                                          | Unknown | 0.0 | 1.4  |

|                |                |                                                                                                                                                                                                                                                                                                                                                   |         |     |      |
|----------------|----------------|---------------------------------------------------------------------------------------------------------------------------------------------------------------------------------------------------------------------------------------------------------------------------------------------------------------------------------------------------|---------|-----|------|
| <i>PEX7</i>    | NM_000288.4    | Peroxisome Biogenesis Disorder 9B (PBD9B); Rhizomelic Chondrodysplasia Punctata, Type 1 (RCDP1)                                                                                                                                                                                                                                                   | Unknown | 0.0 | 0.5  |
| <i>PGAP1</i>   | NM_024989.4    | Intellectual Developmental Disorder, autosomal recessive 42, 615802 (3)                                                                                                                                                                                                                                                                           | Unknown | 0.0 | 1.3  |
| <i>PGAP2</i>   | NM_014489.4    | Hyperphosphatasia With Intellectual Developmental Disorder Syndrome 3 (HPMRS3)                                                                                                                                                                                                                                                                    | Unknown | 0.9 | 0.9  |
| <i>PGAP3</i>   | NM_033419.5    | Hyperphosphatasia with Intellectual Developmental Disorder syndrome 4, 615716 (3)                                                                                                                                                                                                                                                                 | Unknown | 0.0 | 0.7  |
| <i>PGK1</i>    | NM_000291.4    | Phosphoglycerate Kinase 1 Deficiency; Phosphoglycerate Kinase 1 Deficiency                                                                                                                                                                                                                                                                        | Yes     | 0.8 | 0.3  |
| <i>PHACTR1</i> | NM_030948.6    | Epileptic encephalopathy, early infantile, 70, 618298 (3)                                                                                                                                                                                                                                                                                         | Unknown | 0.6 | 0.7  |
| <i>PHF21A†</i> | NM_001352027.3 | Intellectual developmental disorder with behavioral abnormalities and craniofacial dysmorphism with or without seizures, 618725 (3)                                                                                                                                                                                                               | Unknown | 1.0 | 2.9  |
| <i>PHF6</i>    | NM_001015877.2 | Borjeson-Forssman-Lehmann Syndrome (BFLS)                                                                                                                                                                                                                                                                                                         | Yes     | 1.0 | 2.3  |
| <i>PHGDH</i>   | NM_006623.4    | Phosphoglycerate Dehydrogenase Deficiency                                                                                                                                                                                                                                                                                                         | Unknown | 0.0 | 0.2  |
| <i>PHOX2B</i>  | NM_003924.4    | Neuroblastoma, Susceptibility To, 2 (NBLST2); Central Hypoventilation Syndrome, Congenital (CCHS)                                                                                                                                                                                                                                                 | Unknown | 0.9 | 2.1  |
| <i>PI4KA</i>   | NM_058004.4    | Polymicrogyria, perisylvian, with cerebellar hypoplasia and arthrogryposis, 616531 (3)                                                                                                                                                                                                                                                            | Unknown | 0.0 | 3.5  |
| <i>PIEZO2</i>  | NM_001378183.1 | Arthrogryposis, distal, type 5, 108145 (3); Arthrogryposis, distal, type 3, 114300 (3); Marden-Walker syndrome, 248700 (3); Arthrogryposis, distal, with impaired proprioception and touch, 617146 (3) mutation identified in 1 MWKS patient                                                                                                      | Unknown | 0.0 | 3.4  |
| <i>PIGA</i>    | NM_002641.4    | Multiple Congenital Anomalies-Hypotonia-Seizures Syndrome 2 (MCAHS2); Paroxysmal Nocturnal Hemoglobinuria 1 (PNH1)                                                                                                                                                                                                                                | Unknown | 1.0 | 2.2  |
| <i>PIGB</i>    | NM_004855.5    | Epileptic encephalopathy, early infantile, 80, 618580 (3)                                                                                                                                                                                                                                                                                         | Unknown | 0.0 | 0.6  |
| <i>PIGC</i>    | NM_153747.2    | Glycosylphosphatidylinositol biosynthesis defect 16, 617816 (3)                                                                                                                                                                                                                                                                                   | Unknown | 0.0 | 0.8  |
| <i>PIGG</i>    | NM_001127178.3 | Intellectual Developmental Disorder, autosomal recessive 53, 616917 (3)                                                                                                                                                                                                                                                                           | Unknown | 0.0 | -0.2 |
| <i>PIGH</i>    | NM_004569.5    | Glycosylphosphatidylinositol biosynthesis defect 17, 618010 (3)                                                                                                                                                                                                                                                                                   | Unknown | 0.2 | 0.9  |
| <i>PIGL</i>    | NM_004278.4    | Coloboma, Congenital Heart Disease, Ichthyosiform Dermatitis, Mental                                                                                                                                                                                                                                                                              | Unknown | 0.0 | 0.0  |
| <i>PIGM</i>    | NM_145167.3    | Glycosylphosphatidylinositol Deficiency                                                                                                                                                                                                                                                                                                           | Unknown | 0.0 | -0.1 |
| <i>PIGN</i>    | NM_176787.5    | Multiple congenital anomalies-hypotonia-seizures syndrome 1, 614080 (3)                                                                                                                                                                                                                                                                           | Unknown | 0.0 | 0.4  |
| <i>PIGO</i>    | NM_032634.4    | Hyperphosphatasia With Intellectual Developmental Disorder Syndrome 2 (HPMRS2)                                                                                                                                                                                                                                                                    | No      | 0.0 | 1.0  |
| <i>PIGP</i>    | NM_153682.3    | Epileptic encephalopathy, early infantile, 55, 617599 (3)                                                                                                                                                                                                                                                                                         | Unknown | 0.0 | -0.6 |
| <i>PIGQ</i>    | NM_004204.5    | Epileptic encephalopathy, early infantile, 77, 618548 (3)                                                                                                                                                                                                                                                                                         | Unknown | 0.0 | -0.1 |
| <i>PIGS</i>    | NM_033198.4    | Glycosylphosphatidylinositol biosynthesis defect 18, 618143 (3)                                                                                                                                                                                                                                                                                   | Unknown | 0.0 | 0.8  |
| <i>PIGT</i>    | NM_015937.6    | Paroxysmal nocturnal hemoglobinuria 2, 615399 (3); Multiple congenital anomalies-hypotonia-seizures syndrome 3, 615398 (3) mutation identified in 1 PNH2 family                                                                                                                                                                                   | Unknown | 0.0 | 0.3  |
| <i>PIGU</i>    | NM_080476.5    | Neurodevelopmental disorder with brain anomalies, seizures, and scoliosis, 618590 (3)                                                                                                                                                                                                                                                             | Unknown | 0.0 | 0.7  |
| <i>PIGV</i>    | NM_017837.4    | Hyperphosphatasia With Intellectual Developmental Disorder Syndrome 1 (HPMRS1)                                                                                                                                                                                                                                                                    | Unknown | 0.0 | 0.4  |
| <i>PIGW</i>    | NM_001346754.2 | Glycosylphosphatidylinositol biosynthesis defect 11                                                                                                                                                                                                                                                                                               | No      | 0.0 | 0.0  |
| <i>PIGY</i>    | NM_001042616.3 | Hyperphosphatasia with Intellectual Developmental Disorder syndrome 6                                                                                                                                                                                                                                                                             | Unknown | 0.1 | -0.3 |
| <i>PIK3CA</i>  | NM_006218.4    | Cowden Syndrome 5 (CWS5); Congenital Lipomatous Overgrowth, Vascular Malformations, And Epidermal; Megalencephaly-Polymicrogyria-Polydactyly-Hydrocephalus Syndrome; Megalencephaly-Capillary Malformation-Polymicrogyria Syndrome (MCAP); Keratosis, Seborrhic; Ovarian Cancer; Hepatocellular Carcinoma; Colorectal Cancer (CRC); Breast Cancer | Unknown | 1.0 | 5.6  |
| <i>PIK3R2</i>  | NM_005027.4    | Megalencephaly-Polymicrogyria-Polydactyly-Hydrocephalus Syndrome; Megalencephaly-Polymicrogyria-Polydactyly-Hydrocephalus Syndrome                                                                                                                                                                                                                | Unknown | 0.0 | 2.3  |
| <i>PLA2G6</i>  | NM_003560.4    | Parkinson Disease 14, Autosomal Recessive (PARK14); Neurodegeneration with Brain Iron Accumulation 2B (NBIA2B); Neurodegeneration With Brain Iron Accumulation 2A (NBIA2A)                                                                                                                                                                        | Unknown | 0.0 | 1.2  |
| <i>PLAA</i>    | NM_001031689.3 | Neurodevelopmental disorder with progressive microcephaly, spasticity, and brain anomalies, 617527 (3)                                                                                                                                                                                                                                            | Unknown | 0.5 | 1.1  |
| <i>PLCB1</i>   | NM_015192.4    | Epileptic Encephalopathy, Early Infantile, 12 (EIEE12)                                                                                                                                                                                                                                                                                            | No      | 1.0 | 3.8  |
| <i>PLK4</i>    | NM_014264.5    | Microcephaly and chorioretinopathy, autosomal recessive, 2, 616171 (3)                                                                                                                                                                                                                                                                            | Unknown | 0.0 | 0.8  |
| <i>PLP1</i>    | NM_000533.5    | Spastic Paraplegia 2, X-Linked (SPG2); Pelizaeus-Merzbacher Disease (PMD)                                                                                                                                                                                                                                                                         | Yes     | 0.9 | 2.0  |
| <i>PLPBP</i>   | NM_007198.4    | Epilepsy, Early-onset, Vitamin B6-dependent                                                                                                                                                                                                                                                                                                       | Unknown | N/A | N/A  |
| <i>PMM2</i>    | NM_000303.3    | Congenital Disorder of Glycosylation, Type Ia (CDG1A)                                                                                                                                                                                                                                                                                             | No      | 0.0 | -1.4 |
| <i>PMPCB</i>   | NM_004279.3    | Multiple mitochondrial dysfunctions syndrome 6, 617954 (3)                                                                                                                                                                                                                                                                                        | Unknown | 0.0 | -0.2 |

|                              |                |                                                                                                                                                                                                                                                                                                  |         |     |      |
|------------------------------|----------------|--------------------------------------------------------------------------------------------------------------------------------------------------------------------------------------------------------------------------------------------------------------------------------------------------|---------|-----|------|
| <i>PNKP</i>                  | NM_007254.4    | Microcephaly, seizures, and developmental delay, 613402 (3); Ataxia-oculomotor apraxia 4, 616267 (3); Charcot-Marie-Tooth disease, type 2B2, 605589 (3) mutation identified in 1 CMT2B2 family                                                                                                   | Unknown | 0.0 | -1.3 |
| <i>PNPLA8</i>                | NM_001256007.3 | Mitochondrial myopathy with lactic acidosis, 251950 (3) mutation identified in 1 MMLA family                                                                                                                                                                                                     | Unknown | 0.0 | 0.1  |
| <i>PNPO</i>                  | NM_018129.4    | Pyridoxamine 5-Prime-Phosphate Oxidase Deficiency                                                                                                                                                                                                                                                | Unknown | 0.0 | 0.8  |
| <i>POGZ</i> <sup>†</sup>     | NM_015100.4    | White-Sutton syndrome, 616364 (3)                                                                                                                                                                                                                                                                | Yes     | 1.0 | 3.5  |
| <i>POLA1</i>                 | NM_001330360.2 | Pigmentary disorder, reticulate, with systemic manifestations, X-linked, 301220 (3); Van Esch-O'Driscoll syndrome, 301030 (3)                                                                                                                                                                    | Unknown | 1.0 | 2.0  |
| <i>POLG</i>                  | NM_002693.3    | Mitochondrial DNA Depletion Syndrome 4B (Mngie Type) (MTDPS4B); Sensory Ataxic Neuropathy, Dysarthria, And Ophthalmoparesis (SANDO); Progressive External Ophthalmoplegia with Mitochondrial DNA Deletions; Leigh Syndrome (LS); Mitochondrial DNA Depletion Syndrome 4A (Alpers Type) (MTDPS4A) | Unknown | 0.0 | -0.7 |
| <i>POLG2</i>                 | NM_007215.4    | Progressive External Ophthalmoplegia with Mitochondrial DNA Deletions; Progressive External Ophthalmoplegia with Mitochondrial DNA Deletions,                                                                                                                                                    | Unknown | 0.0 | -0.3 |
| <i>POLR2A</i>                | NM_000937.5    | Neurodevelopmental disorder with hypotonia and variable intellectual and behavioral abnormalities                                                                                                                                                                                                | Unknown | 1.0 | 7.1  |
| <i>POLR3A</i>                | NM_007055.4    | Leukodystrophy, Hypomyelinating, 7, with or without Oligodontia And/Or                                                                                                                                                                                                                           | Unknown | 0.0 | 2.3  |
| <i>POMGNT1</i>               | NM_017739.4    | Muscular Dystrophy-Dystroglycanopathy (Limb-Girdle), Type C, 3 (MDDGC3); Muscular Dystrophy-Dystroglycanopathy (Congenital with Intellectual Developmental Disorder); Muscular Dystrophy-Dystroglycanopathy (Congenital with Brain And Eye                                                       | Unknown | 0.0 | 0.9  |
| <i>POMGNT2</i>               | NM_032806.6    | Muscular Dystrophy-Dystroglycanopathy (Congenital with Brain and Eye                                                                                                                                                                                                                             | Unknown | 0.0 | 1.0  |
| <i>POMK</i>                  | NM_032237.5    | Muscular Dystrophy-Dystroglycanopathy (Congenital with Brain and Eye                                                                                                                                                                                                                             | Unknown | 0.0 | 0.5  |
| <i>POMT1</i>                 | NM_001077365.2 | Muscular Dystrophy-Dystroglycanopathy (Congenital with Intellectual Developmental Disorder); Muscular Dystrophy-Dystroglycanopathy (Limb-Girdle), Type C, 1 (MDDGC1); Muscular Dystrophy-Dystroglycanopathy (Congenital With Brain And Eye                                                       | Unknown | 0.0 | 0.6  |
| <i>POMT2</i>                 | NM_013382.7    | Muscular Dystrophy-Dystroglycanopathy (Limb-Girdle), Type C, 2 (MDDGC2); Muscular Dystrophy-Dystroglycanopathy (Congenital with Impaired Intellectual Development); Muscular Dystrophy-Dystroglycanopathy (Congenital With Brain And Eye                                                         | Unknown | 0.0 | 0.1  |
| <i>POU1F1</i>                | NM_000306.4    | Pituitary Hormone Deficiency, Combined, 1 (CPHD1)                                                                                                                                                                                                                                                | Unknown | 0.0 | 0.5  |
| <i>PPM1K</i>                 | NM_152542.5    | Maple Syrup Urine Disease, Mild Variant (MSUDMV)                                                                                                                                                                                                                                                 | Unknown | 0.0 | 1.3  |
| <i>PPOX</i>                  | NM_001122764.3 | Porphyria Variegata                                                                                                                                                                                                                                                                              | Unknown | 0.0 | 1.0  |
| <i>PPP2CA</i> <sup>†</sup>   | NM_002715.4    | Neurodevelopmental disorder and language delay with or without structural brain abnormalities, 618354 (3)                                                                                                                                                                                        | Unknown | 1.0 | 4.2  |
| <i>PPP2R1A</i> <sup>†</sup>  | NM_014225.6    | Intellectual Developmental Disorder, autosomal dominant 36, 616362 (3)                                                                                                                                                                                                                           | Unknown | 1.0 | 4.5  |
| <i>PPP2R5D</i> <sup>†</sup>  | NM_006245.4    | Intellectual Developmental Disorder, autosomal dominant 35, 616355 (3)                                                                                                                                                                                                                           | Unknown | 1.0 | 3.6  |
| <i>PPP3CA</i> <sup>†</sup>   | NM_000944.5    | Epileptic encephalopathy, infantile or early childhood, 1, 617711 (3); Arthrogryposis, cleft palate, craniosynostosis, and impaired intellectual development, 618265 (3)                                                                                                                         | Unknown | 1.0 | 3.6  |
| <i>PPT1</i>                  | NM_000310.4    | Ceroid Lipofuscinosis, Neuronal, 1 (CLN1)                                                                                                                                                                                                                                                        | No      | 0.0 | 0.0  |
| <i>PQBP1</i>                 | NM_001032382.2 | Renpenning Syndrome 1 (RENS1); Renpenning Syndrome 1 (RENS1)                                                                                                                                                                                                                                     | Yes     | 0.8 | 1.9  |
| <i>PRDM8</i>                 | NM_001099403.2 | Epilepsy, progressive myoclonic, 10, 616640 (3) mutation identified in 1 EPM10 family                                                                                                                                                                                                            | Unknown | 0.8 | 0.0  |
| <i>PREPL</i>                 | NM_001171613.2 | Hypotonia-Cystinuria Syndrome                                                                                                                                                                                                                                                                    | No      | 0.0 | -2.5 |
| <i>PRF1</i>                  | NM_001083116.3 | Hemophagocytic Lymphohistiocytosis, Familial, 2 (FHL2)                                                                                                                                                                                                                                           | Unknown | 0.0 | 0.0  |
| <i>PRICKLE1</i>              | NM_153026.3    | Epilepsy, Progressive Myoclonic 1B (EPM1B); Neural Tube Defects                                                                                                                                                                                                                                  | Unknown | 1.0 | 1.8  |
| <i>PRICKLE2</i> <sup>†</sup> | NM_198859.4    | Epilepsy, Progressive Myoclonic 5 (EPM5)                                                                                                                                                                                                                                                         | Unknown | 1.0 | 1.7  |
| <i>PRKDC</i>                 | NM_006904.7    | Immunodeficiency 26, with or without neurologic abnormalities, 615966 (3)                                                                                                                                                                                                                        | Unknown | 1.0 | 2.8  |
| <i>PRMT7</i>                 | NM_019023.5    | Short stature, brachydactyly, intellectual developmental disability, and seizures, 617157 (3)                                                                                                                                                                                                    | Unknown | 0.0 | 0.7  |
| <i>PRODH</i>                 | NM_016335.6    | Schizophrenia 4 (SCZD4); Hyperprolinemia, Type I (HPI); Schizophrenia (SCZD)                                                                                                                                                                                                                     | Unknown | 0.0 | 0.1  |
| <i>PROKR2</i>                | NM_144773.4    | Hypogonadotropic Hypogonadism 3 with or without Anosmia (HH3)                                                                                                                                                                                                                                    | Unknown | 0.0 | -0.1 |
| <i>PROP1</i>                 | NM_006261.5    | Pituitary Hormone Deficiency, Combined, 2 (CPHD2)                                                                                                                                                                                                                                                | No      | 0.1 | 0.2  |
| <i>PROSC</i>                 | NM_007198.4    | Epilepsy, early-onset, vitamin B6-dependent, 617290 (3)                                                                                                                                                                                                                                          | Unknown | 0.0 | 1.0  |
| <i>PRRT2</i> <sup>†</sup>    | NM_145239.3    | Seizures, Benign Familial Infantile, 2 (BFIS2); Convulsions, Familial Infantile, With Paroxysmal Choreoathetosis; Episodic Kinesigenic Dyskinesia 1 (EKD1)                                                                                                                                       | Unknown | 0.6 | 0.2  |
| <i>PRSS12</i>                | NM_003619.4    | Intellectual Developmental Disorder, Autosomal Recessive 1 (MRT1)                                                                                                                                                                                                                                | Unknown | 0.0 | 0.4  |

|                 |                |                                                                                                                                                                                                                                                                                                                                   |         |     |      |
|-----------------|----------------|-----------------------------------------------------------------------------------------------------------------------------------------------------------------------------------------------------------------------------------------------------------------------------------------------------------------------------------|---------|-----|------|
| <i>PRUNE</i>    | NM_021222.3    | Neurodevelopmental disorder with microcephaly, hypotonia, and variable brain anomalies, 617481 (3)                                                                                                                                                                                                                                | Unknown | 0.0 | 1.1  |
| <i>PSAP</i>     | NM_002778.4    | Krabbe Disease, Atypical, Due to Saposin A Deficiency; Combined Saposin Deficiency; Gaucher Disease, Atypical, Due To Saposin C Deficiency; Metachromatic Leukodystrophy Due To Saposin B Deficiency                                                                                                                              | Unknown | 1.0 | -0.5 |
| <i>PSAT1</i>    | NM_058179.4    | Phosphoserine Aminotransferase Deficiency                                                                                                                                                                                                                                                                                         | Unknown | 0.0 | 0.4  |
| <i>PSEN1†</i>   | NM_000021.4    | Acne Inversa, Familial, 3 (ACNINV3); Cardiomyopathy, Dilated, 1U (CMD1U); Alzheimer Disease 3; Frontotemporal Dementia (FTD)                                                                                                                                                                                                      | Unknown | 1.0 | 2.2  |
| <i>PSMB8</i>    | NM_148919.4    | Proteasome-associated autoinflammatory syndrome 1 and digenic forms, 256040 (3) between TAP1 and TAP2                                                                                                                                                                                                                             | Unknown | 0.0 | 0.7  |
| <i>PSPH</i>     | NM_004577.4    | Phosphoserine Phosphatase Deficiency (PSPHD)                                                                                                                                                                                                                                                                                      | No      | 0.0 | 0.8  |
| <i>PTCH1†</i>   | NM_000264.5    | Holoprosencephaly 7 (HPE7); Basal Cell Carcinoma, Susceptibility To, 1 (BCC1); Basal Cell Nevus Syndrome (BCNS)                                                                                                                                                                                                                   | Yes     | 1.0 | 1.7  |
| <i>PTCHD1</i>   | NM_173495.3    | Autism, susceptibility to, X-linked 4, 300830 (3)                                                                                                                                                                                                                                                                                 | Yes     | 1.0 | 2.0  |
| <i>PTEN</i>     | NM_000314.8    | Glioma Susceptibility 2 (GLM2); Chromosome 10Q23 Deletion Syndrome; Endometrial Cancer; Macrocephaly/Autism Syndrome; Vacterl Association with Hydrocephalus; Squamous Cell Carcinoma, Head and Neck (HNSCC); Prostate Cancer; Cowden Syndrome 1 (CWS1); Bannayan-Riley-Ruvalcaba Syndrome (BRRS); Glioma Susceptibility 1 (GLM1) | Yes     | 0.3 | 3.5  |
| <i>PTF1A</i>    | NM_178161.3    | Pancreatic and cerebellar agenesis, 609069 (3); Pancreatic agenesis 2, 615935 (3)                                                                                                                                                                                                                                                 | Unknown | 0.2 | 0.5  |
| <i>PTH</i>      | NM_000315.4    | Hypoparathyroidism, Familial Isolated (FIH)                                                                                                                                                                                                                                                                                       | Unknown | 0.0 | 0.5  |
| <i>PTPN22</i>   | NM_015967.7    | Systemic Lupus Erythematosus (SLE)                                                                                                                                                                                                                                                                                                | Unknown | 0.0 | 0.9  |
| <i>PTPN23</i>   | NM_015466.4    | Neurodevelopmental disorder and structural brain anomalies with or without seizures and spasticity, 618890 (3)                                                                                                                                                                                                                    | Unknown | 0.0 | 1.3  |
| <i>PTS</i>      | NM_000317.3    | Hyperphenylalaninemia, Bh4-Deficient, A (HPABH4A)                                                                                                                                                                                                                                                                                 | No      | 0.0 | 0.1  |
| <i>PUM1†</i>    | NM_001020658.2 | Spinocerebellar ataxia 47, 617931 (3)                                                                                                                                                                                                                                                                                             | Unknown | 1.0 | 4.4  |
| <i>PURA†</i>    | NM_005859.5    | Intellectual Developmental Disorder, autosomal dominant 31, 616158 (3)                                                                                                                                                                                                                                                            | Yes     | 0.9 | 3.4  |
| <i>PUS3</i>     | NM_031307.4    | Intellectual Developmental Disorder, autosomal recessive 55, 617051 (3)                                                                                                                                                                                                                                                           | Unknown | 0.0 | 0.1  |
| <i>QARS</i>     | NM_005051.3    | Microcephaly, progressive, seizures, and cerebral and cerebellar atrophy, 615760 (3)                                                                                                                                                                                                                                              | Unknown | 0.0 | 0.2  |
| <i>QDPR</i>     | NM_000320.3    | Hyperphenylalaninemia, Bh4-Deficient, C (HPABH4C)                                                                                                                                                                                                                                                                                 | Unknown | 0.0 | 0.3  |
| <i>RAB11B</i>   | NM_004218.4    | Neurodevelopmental disorder with ataxic gait, absent speech, and decreased cortical white matter, 617807 (3)                                                                                                                                                                                                                      | Unknown | 0.4 | 2.5  |
| <i>RAB18</i>    | NM_021252.5    | Warburg Micro Syndrome 3 (WARBM3)                                                                                                                                                                                                                                                                                                 | Unknown | 0.9 | 1.4  |
| <i>RAB27A</i>   | NM_183235.3    | GrisCELLI syndrome, type 2, 607624 (3)                                                                                                                                                                                                                                                                                            | Unknown | 0.0 | -0.5 |
| <i>RAB39B</i>   | NM_171998.4    | Intellectual Developmental Disorder, X-Linked 72 (MRX72); Intellectual Developmental Disorder, X-Linked 72 (MRX72)                                                                                                                                                                                                                | Yes     | 0.8 | 1.9  |
| <i>RAB3GAP1</i> | NM_012233.3    | Warburg Micro Syndrome 1 (WARBM1)                                                                                                                                                                                                                                                                                                 | Unknown | 0.0 | 1.2  |
| <i>RAB3GAP2</i> | NM_012414.4    | Warburg Micro Syndrome 2 (WARBM2); Martsolf Syndrome                                                                                                                                                                                                                                                                              | No      | 1.0 | 0.9  |
| <i>RAD21</i>    | NM_006265.3    | Cornelia De Lange Syndrome 4 (CDLS4)                                                                                                                                                                                                                                                                                              | Unknown | 1.0 | 2.6  |
| <i>RAI1†</i>    | NM_030665.4    | Smith-Magenis Syndrome (SMS)                                                                                                                                                                                                                                                                                                      | Unknown | 1.0 | 1.1  |
| <i>RALA</i>     | NM_005402.4    | Global developmental delay; Intellectual disability; Seizures; Abnormality of nervous system morphology                                                                                                                                                                                                                           | Unknown | 1.0 | 2.7  |
| <i>RALGAPA1</i> | NM_001346249.2 | Neurodevelopmental disorder with hypotonia, neonatal respiratory insufficiency, and thermoregulation, 618797 (3) pseudogene on 9q31.1                                                                                                                                                                                             | Unknown | 1.0 | 3.5  |
| <i>RANBP2</i>   | NM_006267.5    | Encephalopathy, Acute, Infection-Induced, Susceptibility To, 3 (IIAE3)                                                                                                                                                                                                                                                            | Unknown | 1.0 | -0.8 |
| <i>RARS</i>     | NM_002887.4    | Leukodystrophy, hypomyelinating, 9, 616140 (3)                                                                                                                                                                                                                                                                                    | Unknown | 0.0 | 0.5  |
| <i>RARS2</i>    | NM_020320.5    | Pontocerebellar Hypoplasia, Type 6 (PCH6)                                                                                                                                                                                                                                                                                         | No      | 0.0 | -0.1 |
| <i>RBM10</i>    | NM_005676.5    | Tarp Syndrome (TARPS); Tarp Syndrome (TARPS)                                                                                                                                                                                                                                                                                      | Unknown | 1.0 | 4.5  |
| <i>RBPJ</i>     | NM_015874.6    | Adams-Oliver Syndrome 3 (AOS3)                                                                                                                                                                                                                                                                                                    | Unknown | 1.0 | 3.6  |
| <i>RD3</i>      | NM_001164688.2 | Leber Congenital Amaurosis 12 (LCA12)                                                                                                                                                                                                                                                                                             | Unknown | 0.0 | 0.6  |
| <i>RDH12</i>    | NM_152443.3    | Leber Congenital Amaurosis 13 (LCA13)                                                                                                                                                                                                                                                                                             | Unknown | 0.0 | -0.1 |
| <i>RECQL4</i>   | NM_004260.4    | Rothmund-Thomson syndrome, type 2, , 268400 (3); Baller-Gerold syndrome, 218600 (3); RAPADILINO syndrome, 266280 (3)                                                                                                                                                                                                              | Unknown | 0.0 | -4.2 |
| <i>RELN</i>     | NM_005045.4    | Lissencephaly 2 (LIS2)                                                                                                                                                                                                                                                                                                            | No      | 1.0 | 2.2  |

|                           |                |                                                                                                                                                                                          |         |     |      |
|---------------------------|----------------|------------------------------------------------------------------------------------------------------------------------------------------------------------------------------------------|---------|-----|------|
| <i>RERE</i> <sup>†</sup>  | NM_001042681.2 | Neurodevelopmental disorder with or without anomalies of the brain, eye, or heart, 616975 (3)                                                                                            | Unknown | 1.0 | 2.0  |
| <i>RFT1</i>               | NM_052859.4    | Congenital Disorder of Glycosylation, Type In (CDG1N)                                                                                                                                    | Unknown | 0.0 | 1.0  |
| <i>RHOBTB2</i>            | NM_015178.3    | Epileptic encephalopathy, early infantile, 64, 618004 (3)                                                                                                                                | Unknown | 0.0 | 2.7  |
| <i>RMND1</i>              | NM_017909.4    | Combined oxidative phosphorylation deficiency 11, 614922 (3)                                                                                                                             | No      | 0.0 | 0.8  |
| <i>RNASEH2A</i>           | NM_006397.3    | Aicardi-Goutieres syndrome 4, 610333 (3)                                                                                                                                                 | Unknown | 0.0 | 0.2  |
| <i>RNASEH2B</i>           | NM_024570.4    | Aicardi-Goutieres Syndrome 2 (AGS2)                                                                                                                                                      | Unknown | 0.0 | -0.2 |
| <i>RNASEH2C</i>           | NM_032193.4    | Aicardi-Goutieres syndrome 3, 610329 (3)                                                                                                                                                 | Unknown | 0.0 | -0.9 |
| <i>RNASET2</i>            | NM_003730.6    | Leukoencephalopathy, Cystic, Without Megalencephaly                                                                                                                                      | Unknown | 0.0 | 0.2  |
| <i>RNF113A</i>            | NM_006978.3    | Trichothiodystrophy 5, nonphotosensitive, 300953 (3)                                                                                                                                     | Unknown | 0.9 | 1.8  |
| <i>RNF125</i>             | NM_017831.4    | Tenorio syndrome, 616260 (3)                                                                                                                                                             | Unknown | 0.0 | 0.8  |
| <i>RNF13</i>              | NM_183381.3    | Epileptic encephalopathy, early infantile, 73, 618379 (3)                                                                                                                                | Unknown | 0.0 | 0.9  |
| <i>RNU4ATAC</i>           | NR_023343.1    | Microcephalic osteodysplastic primordial dwarfism, type I                                                                                                                                | Unknown | N/A | N/A  |
| <i>ROBO3</i>              | NM_022370.4    | Gaze Palsy, Familial Horizontal, With Progressive Scoliosis (HGPPS)                                                                                                                      | No      | 0.0 | 0.6  |
| <i>ROGDI</i>              | NM_024589.3    | Kohlschutter-Tonz Syndrome (KTZS)                                                                                                                                                        | No      | 0.0 | -1.3 |
| <i>RORA</i>               | NM_134261.3    | Intellectual developmental disorder with or without epilepsy or cerebellar ataxia, 618060 (3)                                                                                            | Unknown | 0.4 | 2.6  |
| <i>RORB</i> <sup>†</sup>  | NM_006914.4    | Epilepsy, idiopathic generalized, susceptibility to, 15, 618357 (3)                                                                                                                      | Unknown | 1.0 | 3.1  |
| <i>RPGRIP1L</i>           | NM_015272.5    | Joubert syndrome 7, 611560 (3); Meckel syndrome 5, 611561 (3); COACH syndrome, 216360 (3)                                                                                                | Unknown | 0.0 | -0.1 |
| <i>RPIA</i>               | NM_144563.3    | Ribose 5-Phosphate Isomerase Deficiency                                                                                                                                                  | Unknown | 0.0 | 1.0  |
| <i>RPL10</i>              | NM_006013.5    | Autism, Susceptibility To, X-Linked 5 (AUTSX5); Autism, Susceptibility To, X-Linked 5 (AUTSX5)                                                                                           | Unknown | 0.9 | 2.6  |
| <i>RPS6KA3</i>            | NM_004586.3    | Coffin-Lowry syndrome, 303600 (3); Intellectual Developmental Disorder, X-linked 19, 300844 (3)                                                                                          | Yes     | 1.0 | 4.5  |
| <i>RRM2B</i>              | NM_015713.5    | Progressive External Ophthalmoplegia with Mitochondrial DNA Deletions; Mitochondrial DNA Depletion Syndrome 8A (Encephalomyopathic Type with Renal Tubulopathy)                          | Unknown | 0.0 | 1.2  |
| <i>RTN4IP1</i>            | NM_032730.5    | Optic atrophy 10 with or without ataxia, Intellectual Developmental Disorder, and seizures, 616732 (3)                                                                                   | Unknown | 0.0 | 0.7  |
| <i>RTTN</i>               | NM_173630.4    | Polymicrogyria With Seizures (PMGYS)                                                                                                                                                     | Unknown | 0.0 | 0.1  |
| <i>RUBCN</i>              | NM_014687.4    | Spinocerebellar ataxia, autosomal recessive 15                                                                                                                                           | Unknown | N/A | N/A  |
| <i>RYR2</i> <sup>†</sup>  | NM_001035.3    | Ventricular Tachycardia, Catecholaminergic Polymorphic, 1, with or without Atrial Dysfunction or Dilated Cardiomyopathy; Arrhythmogenic Right Ventricular Dysplasia, Familial, 2 (ARVD2) | Unknown | 1.0 | 5.8  |
| <i>RYR3</i>               | NM_001036.6    | Epileptic encephalopathy                                                                                                                                                                 | Unknown | 0.7 | 1.8  |
| <i>SAMHD1</i>             | NM_015474.4    | Chilblain Lupus 2 (CHBL2); Aicardi-Goutieres Syndrome 5 (AGS5)                                                                                                                           | Unknown | 0.0 | 1.5  |
| <i>SASS6</i>              | NM_194292.3    | Microcephaly 14, primary, autosomal recessive, 616402 (3) mutation identified in 1 MCPH14 family                                                                                         | Unknown | 0.0 | 1.0  |
| <i>SATB2</i>              | NM_001172509.2 | Cleft Palate, Isolated (CPI)                                                                                                                                                             | Yes     | 1.0 | 4.1  |
| <i>SC5D</i>               | NM_006918.5    | Lathosterolosis                                                                                                                                                                          | Unknown | 0.0 | 0.7  |
| <i>SCAMP5</i>             | NM_138967.4    | Global developmental delay;Intellectual disability;Seizures;Abnormality of nervous system morphology;Behavioral abnormality                                                              | Unknown | 0.7 | 2.0  |
| <i>SCARB2</i>             | NM_005506.4    | Epilepsy, Progressive Myoclonic 4, with or without Renal Failure                                                                                                                         | Unknown | 0.0 | 1.3  |
| <i>SCN10A</i>             | NM_006514.4    | Episodic pain syndrome, familial, 2, 615551 (3)                                                                                                                                          | Unknown | 0.0 | -0.7 |
| <i>SCN11A</i>             | NM_001349253.2 | Neuropathy, hereditary sensory and autonomic, type VII, 615548 (3); Episodic pain syndrome, familial, 3, 615552 (3)                                                                      | Unknown | 0.0 | 1.0  |
| <i>SCN1A</i> <sup>†</sup> | NM_001165963.4 | Migraine, Familial Hemiplegic, 3 (FHM3); Dravet Syndrome; Generalized Epilepsy with Febrile Seizures Plus, Type 2 (GEFSP2)                                                               | Yes     | 1.0 | 5.2  |
| <i>SCN1B</i> <sup>†</sup> | NM_001037.5    | Brugada Syndrome 5 (BRGDA5); Generalized Epilepsy with Febrile Seizures Plus, Type 1 (GEFSP1)                                                                                            | Unknown | 0.1 | 1.2  |
| <i>SCN2A</i> <sup>†</sup> | NM_001040142.2 | Epileptic Encephalopathy, Early Infantile, 11 (EIEE11); Seizures, Benign Familial Infantile, 3 (BFIS3)                                                                                   | Yes     | 1.0 | 6.5  |
| <i>SCN2B</i>              | NM_004588.5    | Atrial fibrillation, familial, 14, 615378 (3)                                                                                                                                            | Unknown | 0.0 | 0.3  |
| <i>SCN3A</i> <sup>†</sup> | NM_006922.4    | Epilepsy, familial focal, with variable foci 4, 617935 (3); Epileptic encephalopathy, early infantile, 62, 617938 (3)                                                                    | Unknown | 1.0 | 4.6  |



|          |                |                                                                                                                                                                                                                                                                                                                                                                        |         |     |      |
|----------|----------------|------------------------------------------------------------------------------------------------------------------------------------------------------------------------------------------------------------------------------------------------------------------------------------------------------------------------------------------------------------------------|---------|-----|------|
| SCN3B    | NM_001040151.2 | Brugada Syndrome 7 (BRGDA7)                                                                                                                                                                                                                                                                                                                                            | Unknown | 0.1 | 0.8  |
| SCN4A    | NM_000334.4    | Myasthenic Syndrome, Congenital, Acetazolamide-Responsive; Hypokalemic Periodic Paralysis, Type 2 (HOKPP2); Myotonia, Potassium-Aggravated; Hyperkalemic Periodic Paralysis (HYPP); Paramyotonia Congenita Of Von Eulenburg (PMC)                                                                                                                                      | Unknown | 0.0 | 1.6  |
| SCN4B    | NM_174934.4    | Long Qt Syndrome 10 (LQT10)                                                                                                                                                                                                                                                                                                                                            | Unknown | 0.0 | -0.2 |
| SCN5A    | NM_000335.5    | Atrial Fibrillation, Familial, 10 (ATFB10); Sick Sinus Syndrome 1, Autosomal Recessive (SSS1); Long Qt Syndrome 3 (LQT3); Ventricular Fibrillation During Myocardial Infarction, Susceptibility; Cardiomyopathy, Dilated, 1E (CMD1E); Brugada Syndrome 1 (BRGDA1); Sudden Infant Death Syndrome; Progressive Familial Heart Block, Type Ia (PFHB1A); Atrial Standstill | Unknown | 0.9 | 2.8  |
| SCN8A†   | NM_001330260.2 | Epileptic Encephalopathy, Early Infantile, 13 (EIEE13); Cognitive Impairment with or without Cerebellar Ataxia (CIAT)                                                                                                                                                                                                                                                  | Unknown | 1.0 | 7.6  |
| SCN9A    | NM_001365536.1 | Generalized Epilepsy with Febrile Seizures Plus, Type 7 (GEFSP7); Indifference to Pain, Congenital, Autosomal Recessive; Paroxysmal Extreme Pain Disorder; Erythralgia, Primary                                                                                                                                                                                        | Unknown | 0.0 | 1.1  |
| SCO2     | NM_005138.3    | Myopia 6 (MYP6); Cardioencephalomyopathy, Fatal Infantile, Due to Cytochrome C Oxidase                                                                                                                                                                                                                                                                                 | Unknown | 0.0 | -1.6 |
| SDHA     | NM_004168.4    | Paragangliomas 5 (PGL5); Cardiomyopathy, Dilated, 1Gg (CMD1GG); Leigh Syndrome (LS); Mitochondrial Complex Ii Deficiency                                                                                                                                                                                                                                               | Unknown | 0.0 | 0.7  |
| SDHAF1   | NM_001042631.3 | Mitochondrial Complex Ii Deficiency                                                                                                                                                                                                                                                                                                                                    | No      | 0.1 | 0.4  |
| SEC23B   | NM_006363.6    | Anemia, Dyserythropoietic Congenital, Type Ii (CDAN2)                                                                                                                                                                                                                                                                                                                  | No      | 0.0 | 0.5  |
| SEPSECS  | NM_016955.4    | Pontocerebellar Hypoplasia, Type 2D (PCH2D)                                                                                                                                                                                                                                                                                                                            | Unknown | 0.0 | 0.0  |
| SERAC1   | NM_032861.4    | 3-Methylglutaconic Aciduria with Deafness, Encephalopathy, And Leigh-Like                                                                                                                                                                                                                                                                                              | Unknown | 0.0 | 1.5  |
| SERPINI1 | NM_001122752.2 | Encephalopathy, Familial, with Neuroserpin Inclusion Bodies (FENIB)                                                                                                                                                                                                                                                                                                    | Unknown | 0.0 | 0.4  |
| SETBP1   | NM_015559.3    | Myelodysplastic Syndrome (MDS); Leukemia, Chronic Myeloid (CML); Juvenile Myelomonocytic Leukemia (JMML); Leukemia, Acute Myeloid (AML); Schinzel-Giedion Midface Retraction Syndrome                                                                                                                                                                                  | Yes     | 1.0 | 1.1  |
| SETD1A†  | NM_014712.3    | Epilepsy, early-onset, with or without developmental delay, 618832 (3)                                                                                                                                                                                                                                                                                                 | Yes     | 1.0 | 1.8  |
| SETD1B†  | NM_001353345.2 | Intellectual developmental disorder with seizures and language delay, 619000 (3)                                                                                                                                                                                                                                                                                       | Unknown | 1.0 | 4.7  |
| SETD2    | NM_014159.7    | Renal Cell Carcinoma, Nonpapillary (RCC)                                                                                                                                                                                                                                                                                                                               | Unknown | 1.0 | 3.0  |
| SETD5†   | NM_001080517.3 | Intellectual Developmental Disorder, autosomal dominant 23, 615761 (3)                                                                                                                                                                                                                                                                                                 | Yes     | 1.0 | 1.1  |
| SGSH     | NM_000199.5    | Mucopolysaccharidosis type IIIA (Sanfilippo A), 252900 (3)                                                                                                                                                                                                                                                                                                             | No      | 0.0 | -0.1 |
| SHANK3†  | NM_001372044.2 | Phelan-McDermid syndrome, 606232 (3); Schizophrenia 15, 613950 (3)                                                                                                                                                                                                                                                                                                     | Yes     | 1.0 | 3.7  |
| SHH      | NM_000193.4    | Micropthalmia, Isolated, With Coloboma 5 (MCOPCB5); Polydactyly, Preaxial Ii (PPD2); Solitary Median Maxillary Central Incisor (SMMCI); Holoprosencephaly 3 (HPE3)                                                                                                                                                                                                     | Yes     | 1.0 | 2.9  |
| SHROOM4  | NM_020717.5    | Stocco Dos Santos X-Linked Intellectual Developmental Disorder Syndrome; Stocco Dos Santos X-Linked Intellectual Developmental Disorder Syndrome                                                                                                                                                                                                                       | Unknown | 1.0 | 1.0  |
| SIK1†    | NM_173354.5    | Epileptic encephalopathy, early infantile, 30, 616341 (3)                                                                                                                                                                                                                                                                                                              | Unknown | 0.9 | 1.5  |
| SIN3A    | NM_001145358.2 | Witteveen-Kolk syndrome, 613406 (3)                                                                                                                                                                                                                                                                                                                                    | Yes     | 1.0 | 4.4  |
| SIX3     | NM_005413.4    | Holoprosencephaly 2 (HPE2)                                                                                                                                                                                                                                                                                                                                             | Yes     | 0.9 | 2.1  |
| SK†      | NM_003036.4    | Shprintzen-Goldberg syndrome, 182212 (3) formerly mapped to 1q22-q24                                                                                                                                                                                                                                                                                                   | Unknown | 1.0 | 1.5  |
| SLC12A1  | NM_000338.3    | Bartter Syndrome, Antenatal, Type 1                                                                                                                                                                                                                                                                                                                                    | No      | 0.0 | 1.2  |
| SLC12A3  | NM_001126108.2 | Gitelman Syndrome                                                                                                                                                                                                                                                                                                                                                      | No      | 0.0 | -0.9 |
| SLC12A5  | NM_020708.5    | Epileptic encephalopathy, early infantile, 34, 616645 (3); Epilepsy, idiopathic generalized, susceptibility to, 14, 616685 (3)                                                                                                                                                                                                                                         | Unknown | 1.0 | 4.7  |
| SLC12A6  | NM_001365088.1 | Agenesis of the Corpus Callosum With Peripheral Neuropathy (ACCPN)                                                                                                                                                                                                                                                                                                     | Unknown | 0.0 | 3.0  |
| SLC13A5  | NM_177550.5    | Epileptic encephalopathy, early infantile, 25, 615905 (3)                                                                                                                                                                                                                                                                                                              | No      | 0.0 | 1.1  |
| SLC16A1  | NM_003051.4    | Hyperinsulinemic Hypoglycemia, Familial, 7 (HHF7); Erythrocyte Lactate Transporter Defect                                                                                                                                                                                                                                                                              | Unknown | 0.0 | 1.7  |
| SLC16A2  | NM_006517.5    | Allan-Herndon-Dudley Syndrome (AHDS)                                                                                                                                                                                                                                                                                                                                   | Yes     | 1.0 | 2.4  |
| SLC17A5  | NM_012434.5    | Salla Disease (SD); Infantile Sialic Acid Storage Disease (ISSD)                                                                                                                                                                                                                                                                                                       | No      | 0.0 | 0.7  |
| SLC19A2  | NM_006996.3    | Thiamine-Responsive Megaloblastic Anemia Syndrome (TRMA)                                                                                                                                                                                                                                                                                                               | Unknown | 0.0 | 0.2  |
| SLC19A3  | NM_025243.4    | Thiamine Metabolism Dysfunction Syndrome 2 (Biotin- Or Thiamine-Responsive                                                                                                                                                                                                                                                                                             | Unknown | 0.1 | -0.4 |
| SLC1A2†  | NM_004171.4    | Epileptic encephalopathy, early infantile, 41, 617105 (3)                                                                                                                                                                                                                                                                                                              | Unknown | 0.7 | 2.3  |

|          |                |                                                                                                                                                                            |         |     |      |
|----------|----------------|----------------------------------------------------------------------------------------------------------------------------------------------------------------------------|---------|-----|------|
| SLC1A3   | NM_004172.5    | Episodic Ataxia, Type 6 (EA6)                                                                                                                                              | Unknown | 1.0 | 1.8  |
| SLC1A4   | NM_003038.5    | Spastic tetraplegia, thin corpus callosum, and progressive microcephaly, 616657 (3)                                                                                        | Unknown | 0.1 | 1.7  |
| SLC20A2  | NM_001257180.2 | Basal ganglia calcification, idiopathic, 1, 213600 (3)                                                                                                                     | Unknown | 1.0 | 2.6  |
| SLC25A1  | NM_005984.5    | Combined D-2- And L-2-Hydroxyglutaric Aciduria (D2L2AD); Combined D-2- And L-2-Hydroxyglutaric Aciduria (D2L2AD)                                                           | Unknown | 0.1 | 1.2  |
| SLC25A12 | NM_003705.5    | Hypomyelination, Global Cerebral                                                                                                                                           | Unknown | 0.2 | 2.7  |
| SLC25A15 | NM_014252.4    | Hyperornithinemia-Hyperammonemia-Homocitrullinuria Syndrome                                                                                                                | Unknown | 0.0 | 0.1  |
| SLC25A19 | NM_001126121.2 | Thiamine Metabolism Dysfunction Syndrome 4 (Bilateral Striatal Degeneration; Microcephaly, Amish Type (MCPHA))                                                             | No      | 0.6 | 0.6  |
| SLC25A20 | NM_000387.6    | Carnitine-Acylcarnitine Translocase Deficiency                                                                                                                             | Unknown | 0.0 | 0.3  |
| SLC25A22 | NM_001191061.2 | Epileptic Encephalopathy, Early Infantile, 3 (EIEE3)                                                                                                                       | Unknown | 0.0 | 0.9  |
| SLC25A4  | NM_0011151.4   | Progressive External Ophthalmoplegia with Mitochondrial DNA Deletions,                                                                                                     | Unknown | 0.5 | 1.9  |
| SLC2A1   | NM_006516.4    | Epilepsy, Idiopathic Generalized, Susceptibility To, 12 (EIG12); Glut1 Deficiency Syndrome 2 (GLUT1DS2); Glut1 Deficiency Syndrome 1 (GLUT1DS1); Dystonia 9 (DYT9)         | Yes     | 1.0 | 2.9  |
| SLC33A1  | NM_004733.4    | Congenital Cataracts, Hearing Loss, And Neurodegeneration (CCHLND); Spastic Paraplegia 42, Autosomal Dominant (SPG42)                                                      | Unknown | 0.0 | 2.0  |
| SLC35A1  | NM_006416.5    | Congenital Disorder of Glycosylation, Type Iif (CDG2F)                                                                                                                     | Unknown | 0.7 | 1.3  |
| SLC35A2  | NM_005660.3    | Congenital Disorder of Glycosylation, Type Iim (CDG2M); Congenital Disorder Of Glycosylation, Type Iim (CDG2M)                                                             | Yes     | 0.7 | 2.5  |
| SLC35A3  | NM_012243.3    | Arthrogryposis, Intellectual Developmental Disorder, and seizures, 615553 (3) mutation identified in 1 family                                                              | Unknown | 0.0 | 1.4  |
| SLC35C1  | NM_018389.5    | Congenital disorder of glycosylation, type IIc, 266265 (3)                                                                                                                 | No      | 0.0 | 1.2  |
| SLC37A4  | NM_001467.6    | Glycogen Storage Disease Ic; Glycogen Storage Disease Ib; Glycogen Storage Disease Ic; Glycogen Storage Disease Ib                                                         | No      | 0.0 | 0.0  |
| SLC39A8  | NM_001135146.2 | Congenital disorder of glycosylation, type IIh, 616721 (3)                                                                                                                 | Unknown | 0.7 | 1.1  |
| SLC3A1   | NM_000341.4    | Hypotonia-Cystinuria Syndrome; Cystinuria                                                                                                                                  | No      | 0.0 | -3.1 |
| SLC45A1  | NM_001080397.3 | Intellectual developmental disorder with neuropsychiatric features, 617532 (3)                                                                                             | Unknown | 0.0 | 1.5  |
| SLC46A1  | NM_080669.6    | Folate Malabsorption, Hereditary; Folate Malabsorption, Hereditary                                                                                                         | Unknown | 0.0 | 1.2  |
| SLC5A6   | NM_021095.4    | Neurodegeneration, infantile-onset, biotin-responsive, 618973 (3)                                                                                                          | Unknown | 0.0 | 1.6  |
| SLC6A1†  | NM_003042.4    | Myoclonic-atonic epilepsy, 616421 (3)                                                                                                                                      | Yes     | 1.0 | 4.2  |
| SLC6A19  | NM_001003841.3 | Iminoglycinuria; Hartnup Disorder; Hyperglycinuria                                                                                                                         | Unknown | 0.0 | 0.0  |
| SLC6A5   | NM_004211.5    | Hyperreflexia 3 (HKPX3)                                                                                                                                                    | Unknown | 0.0 | -0.1 |
| SLC6A8   | NM_005629.4    | Cerebral Creatine Deficiency Syndrome 1 (CCDS1); Cerebral Creatine Deficiency Syndrome 1 (CCDS1)                                                                           | Yes     | 1.0 | 3.0  |
| SLC9A6   | NM_001379110.1 | Intellectual Developmental Disorder, X-Linked, Syndromic, Christianson Type (MRXSCH); Intellectual Developmental Disorder, X-Linked, Syndromic, Christianson Type (MRXSCH) | Yes     | 1.0 | 3.0  |
| SLC9A9   | NM_173653.4    | Autism susceptibility 16, 613410 (3) mutation identified in 1 family                                                                                                       | Unknown | 0.0 | -0.2 |
| SMARCA2  | NM_003070.5    | Nicolaiides-Baraitser Syndrome (NCBRS)                                                                                                                                     | Unknown | 1.0 | 5.1  |
| SMARCA4† | NM_003072.5    | Intellectual Developmental Disorder, Autosomal Dominant 16 (MRD16); Rhabdoid Tumor Predisposition Syndrome 2 (RTPS2)                                                       | Unknown | 1.0 | 6.8  |
| SMARCB1† | NM_003073.5    | Intellectual Developmental Disorder, Autosomal Dominant 15 (MRD15); Rhabdoid Tumor Predisposition Syndrome 1 (RTPS1); Schwannomatosis                                      | Yes     | 1.0 | 3.6  |
| SMARCC2† | NM_001330288.2 | Coffin-Siris syndrome 8, 618362 (3)                                                                                                                                        | Unknown | 1.0 | 3.9  |
| SMARCE1  | NM_003079.5    | Meningioma, familial, susceptibility to, 607174 (3); Coffin-Siris syndrome 5, 616938 (3)                                                                                   | Unknown | 1.0 | 2.7  |
| SMC1A    | NM_006306.4    | Cornelia De Lange Syndrome 2 (CDLS2); Cornelia De Lange Syndrome 2 (CDLS2)                                                                                                 | Yes     | 1.0 | 6.4  |
| SMC3†    | NM_005445.4    | Cornelia De Lange Syndrome 3 (CDLS3)                                                                                                                                       | Unknown | 1.0 | 6.4  |
| SMPD1    | NM_000543.5    | Niemann-Pick Disease, Type B; Niemann-Pick Disease, Type A                                                                                                                 | Unknown | 0.0 | -0.1 |
| SMS      | NM_004595.5    | Intellectual Developmental Disorder, X-Linked, Syndromic, Snyder-Robinson Type (MRXSSR)                                                                                    | Yes     | 1.0 | 2.3  |
| SNAP25†  | NM_130811.4    | Myasthenic syndrome, congenital, 18, 616330 (3) mutation identified in 1 CMS18 patient                                                                                     | Unknown | 1.0 | 3.0  |
| SNAP29   | NM_004782.4    | Cerebral Dysgenesis, Neuropathy, Ichthyosis, And Palmoplantar Keratoderma                                                                                                  | Unknown | 0.0 | -0.9 |

|                           |                |                                                                                                                                                      |           |     |      |
|---------------------------|----------------|------------------------------------------------------------------------------------------------------------------------------------------------------|-----------|-----|------|
| <i>SNIP1</i>              | NM_024700.4    | Psychomotor Retardation, Epilepsy, And Craniofacial Dysmorphism                                                                                      | Unknown   | 0.4 | 1.2  |
| <i>SNRPN</i>              | NM_003097.6    | Prader-Willi syndrome, 176270 (3)                                                                                                                    | Unknown   | 0.0 | 2.4  |
| <i>SNX14</i>              | NM_153816.6    | Spinocerebellar ataxia, autosomal recessive 20, 616354 (3)                                                                                           | Unknown   | 0.0 | 1.8  |
| <i>SNX27</i>              | NM_001330723.2 | Generalized hypotonia;Global developmental delay;Intellectual disability;Seizures                                                                    | Unknown   | 1.0 | 2.2  |
| <i>SON<sup>†</sup></i>    | NM_138927.4    | ZTTK syndrome, 617140 (3)                                                                                                                            | Yes       | 1.0 | 1.5  |
| <i>SOX10</i>              | NM_006941.4    | Waardenburg Syndrome, Type 4C (WS4C); Waardenburg Syndrome, Type 2E (WS2E); Peripheral Demyelinating Neuropathy, Central Dismyelination, Waardenburg | Yes       | 1.0 | 2.8  |
| <i>SOX11</i>              | NM_003108.4    | Coffin-Siris syndrome 9, 615866 (3)                                                                                                                  | Yes       | 0.9 | 2.3  |
| <i>SOX2</i>               | NM_003106.4    | Microphthalmia, syndromic 3, 206900 (3); Optic nerve hypoplasia and abnormalities of the central nervous system, 206900 (3)                          | Yes       | 0.7 | 2.1  |
| <i>SOX3</i>               | NM_005634.3    | Panhypopituitarism, X-Linked (PHPX); 46,XX Sex Reversal 3 (SRXX3); Intellectual Developmental Disorder, X-Linked, With Panhypopituitarism            | Unknown   | 0.4 | 2.2  |
| <i>SOX5</i>               | NM_006940.6    | Lamb-Shaffer syndrome, 616803 (3) some LAMSHF patients have 12p12 deletions                                                                          | Yes       | 1.0 | 3.2  |
| <i>SPAST</i>              | NM_014946.4    | Spastic Paraplegia 4, Autosomal Dominant (SPG4)                                                                                                      | Yes       | 1.0 | 1.2  |
| <i>SPATA5</i>             | NM_145207.3    | Epilepsy, hearing loss, and Intellectual Developmental Disorder syndrome, 616577 (3)                                                                 | Unknown   | 0.0 | 0.5  |
| <i>SPATA7</i>             | NM_018418.5    | Leber Congenital Amaurosis 3 (LCA3); Retinitis Pigmentosa (RP)                                                                                       | No        | 0.0 | 0.0  |
| <i>SPG11</i>              | NM_025137.4    | Spastic Paraplegia 11, Autosomal Recessive (SPG11)                                                                                                   | Unknown   | 0.0 | -1.4 |
| <i>SPG7</i>               | NM_003119.4    | Spastic Paraplegia 7, Autosomal Recessive (SPG7)                                                                                                     | Unknown   | 0.0 | -0.9 |
| <i>SPINK5</i>             | NM_006846.4    | Netherton Syndrome (NETH)                                                                                                                            | Unknown   | 0.0 | 0.3  |
| <i>SPR</i>                | NM_003124.5    | Dystonia, Dopa-Responsive, Due to Sepiapterin Reductase Deficiency                                                                                   | Unknown   | 0.0 | 0.7  |
| <i>SPRY4</i>              | NM_001127496.3 | Hypogonadotropic Hypogonadism 17 with or without Anosmia (HH17)                                                                                      | Unknown   | 0.0 | 0.5  |
| <i>SPTAN1<sup>†</sup></i> | NM_001130438.3 | Epileptic Encephalopathy, Early Infantile, 5 (EIEE5)                                                                                                 | Unknown   | 1.0 | 5.5  |
| <i>SRCAP<sup>†</sup></i>  | NM_006662.3    | Floating-Harbor Syndrome (FLHS)                                                                                                                      | Uncertain | 1.0 | 2.1  |
| <i>SRD5A3</i>             | NM_024592.5    | Kahrizi Syndrome (KHRZ); Congenital Disorder of Glycosylation, Type Iq (CDG1Q)                                                                       | Unknown   | 0.0 | 0.8  |
| <i>SRPX2</i>              | NM_014467.3    | Rolandic Epilepsy, Intellectual Developmental Disorder, And Speech Dyspraxia, X-Linked                                                               | Unknown   | 0.0 | 0.2  |
| <i>SSR4</i>               | NM_006280.3    | Congenital disorder of glycosylation, type Iy, 300934 (3)                                                                                            | Unknown   | 0.9 | 0.9  |
| <i>ST3GAL3</i>            | NM_006279.5    | Epileptic Encephalopathy, Early Infantile, 15 (EIEE15); Intellectual Developmental Disorder, Autosomal Recessive 12 (MRT12)                          | Unknown   | 0.0 | 1.5  |
| <i>ST3GAL5</i>            | NM_003896.4    | Amish Infantile Epilepsy Syndrome                                                                                                                    | No        | 0.0 | 1.0  |
| <i>STAG1<sup>†</sup></i>  | NM_005862.3    | Intellectual Developmental Disorder, autosomal dominant 47, 617635 (3)                                                                               | Unknown   | 1.0 | 4.4  |
| <i>STAG2</i>              | NM_001042750.2 | Mullegama-Klein-Martinez syndrome, 301022 (3); Holoprosencephaly 13, X-linked, 301043 (3)                                                            | Unknown   | 1.0 | 4.9  |
| <i>STAMBP</i>             | NM_213622.4    | Microcephaly-Capillary Malformation Syndrome (MICCAP)                                                                                                | Unknown   | 0.0 | 0.9  |
| <i>STAR</i>               | NM_000349.3    | Lipoid Congenital Adrenal Hyperplasia (LCAH)                                                                                                         | Unknown   | 0.0 | -0.1 |
| <i>STIL</i>               | NM_001048166.1 | Microcephaly 7, Primary, Autosomal Recessive (MCPH7)                                                                                                 | Unknown   | 0.2 | 1.1  |
| <i>STRADA</i>             | NM_001003787.4 | Polyhydramnios, megalencephaly, and symptomatic epilepsy, 611087 (3)                                                                                 | Unknown   | 0.0 | 1.5  |
| <i>STS</i>                | NM_001320752.2 | Ichthyosis, X-Linked (XLI)                                                                                                                           | Yes       | 0.8 | 1.1  |
| <i>STT3A</i>              | NM_152713.5    | Congenital disorder of glycosylation, type Iw, 615596 (3)                                                                                            | No        | 0.0 | 3.6  |
| <i>STT3B</i>              | NM_178862.3    | Congenital disorder of glycosylation, type Ix, 615597 (3) mutation identified in 1 family                                                            | Unknown   | 1.0 | 3.8  |
| <i>STX11</i>              | NM_003764.4    | Hemophagocytic Lymphohistiocytosis, Familial, 4 (FHL4)                                                                                               | Unknown   | 0.0 | -0.1 |
| <i>STX16<sup>†</sup></i>  | NM_001001433.3 | Pseudohypoparathyroidism, Type Ib (PHP1B)                                                                                                            | Unknown   | 0.5 | 1.0  |
| <i>STX1B<sup>†</sup></i>  | NM_052874.5    | Generalized epilepsy with febrile seizures plus, type 9, 616172 (3)                                                                                  | Unknown   | 1.0 | 2.9  |
| <i>STXBP1<sup>†</sup></i> | NM_001032221.6 | Epileptic Encephalopathy, Early Infantile, 4 (EIEE4)                                                                                                 | Yes       | 1.0 | 4.3  |
| <i>STXBP2</i>             | NM_006949.4    | Hemophagocytic Lymphohistiocytosis, Familial, 5 (FHL5)                                                                                               | Unknown   | 0.0 | 0.5  |
| <i>SUCLA2</i>             | NM_003850.3    | Mitochondrial DNA Depletion Syndrome 5 (Encephalomyopathic with or without Methylmalonic Aciduria)                                                   | Unknown   | 0.0 | 1.0  |
| <i>SUCLG1</i>             | NM_003849.4    | Mitochondrial DNA Depletion Syndrome 9 (Encephalomyopathic Type with or without Methylmalonic Aciduria)                                              | No        | 0.0 | -0.2 |
| <i>SUMF1</i>              | NM_182760.4    | Multiple Sulfatase Deficiency (MSD)                                                                                                                  | No        | 0.0 | -0.5 |
| <i>SUOX</i>               | NM_001032386.2 | Sulfocysteinuria                                                                                                                                     | Unknown   | 0.0 | 0.4  |
| <i>SURF1</i>              | NM_003172.4    | Leigh Syndrome (LS); Leigh Syndrome (LS)                                                                                                             | Unknown   | 0.0 | -0.7 |

|                 |                |                                                                                                                                                                                                                                                                                                                                    |           |     |      |
|-----------------|----------------|------------------------------------------------------------------------------------------------------------------------------------------------------------------------------------------------------------------------------------------------------------------------------------------------------------------------------------|-----------|-----|------|
| <i>SYN1</i>     | NM_006950.3    | Epilepsy, X-Linked, With Variable Learning Disabilities and Behavior                                                                                                                                                                                                                                                               | Unknown   | 1.0 | 3.0  |
| <i>SYNGAP1†</i> | NM_006772.3    | Intellectual Developmental Disorder, Autosomal Dominant 5 (MRD5); Intellectual Developmental Disorder, Autosomal Dominant 5 (MRD5)                                                                                                                                                                                                 | Yes       | 1.0 | 5.6  |
| <i>SYNJ1</i>    | NM_203446.3    | Parkinson disease 20, early-onset, 615530 (3); Epileptic encephalopathy, early infantile, 53, 617389 (3)                                                                                                                                                                                                                           | Unknown   | 0.4 | 2.2  |
| <i>SYP</i>      | NM_003179.3    | Intellectual Developmental Disorder, X-Linked 96 (MRX96); Intellectual Developmental Disorder, X-Linked 96 (MRX96)                                                                                                                                                                                                                 | Uncertain | 0.9 | 1.3  |
| <i>SYT2</i>     | NM_177402.5    | Myasthenic syndrome, congenital, 7, presynaptic, 616040 (3)                                                                                                                                                                                                                                                                        | Unknown   | 1.0 | 2.0  |
| <i>SZT2</i>     | NM_001365999.1 | Epileptic encephalopathy, early infantile, 18, 615476 (3)                                                                                                                                                                                                                                                                          | Unknown   | 0.0 | 2.6  |
| <i>TACO1</i>    | NM_016360.4    | Leigh Syndrome (LS)                                                                                                                                                                                                                                                                                                                | Unknown   | 0.0 | 0.9  |
| <i>TACR3</i>    | NM_001059.3    | Hypogonadotropic Hypogonadism 11 with or without Anosmia (HH11)                                                                                                                                                                                                                                                                    | Unknown   | 0.0 | 0.6  |
| <i>TANC2†</i>   | NM_025185.4    | Intellectual developmental disorder with autistic features and language delay, with or without seizures, 618906 (3)                                                                                                                                                                                                                | Unknown   | 1.0 | 2.3  |
| <i>TANGO2</i>   | NM_152906.7    | Metabolic encephalomyopathic crises, recurrent, with rhabdomyolysis, cardiac arrhythmias, and neurodegeneration, 616878 (3)                                                                                                                                                                                                        | Unknown   | 0.0 | 0.4  |
| <i>TAT</i>      | NM_000353.3    | Tyrosinemia, Type II                                                                                                                                                                                                                                                                                                               | Unknown   | 0.0 | 0.8  |
| <i>TAZ</i>      | NM_000116.5    | Barth Syndrome (BTHS); Barth Syndrome (BTHS)                                                                                                                                                                                                                                                                                       | Unknown   | 0.7 | 2.2  |
| <i>TBC1D20</i>  | NM_144628.4    | Warburg micro syndrome 4, 615663 (3)                                                                                                                                                                                                                                                                                               | No        | 0.9 | 1.2  |
| <i>TBC1D24</i>  | NM_001199107.2 | Myoclonic epilepsy, infantile, familial, 605021 (3); Epileptic encephalopathy, early infantile, 16, 615338 (3); DOORS syndrome, 220500 (3); Deafness, autosomal recessive 86, 614617 (3); Deafness, autosomal dominant 65, 616044 (3); Epilepsy, rolandic, with proxysmal exercise-induced dystonia and writer's cramp, 608105 (3) | Unknown   | 0.0 | 0.8  |
| <i>TBCD</i>     | NM_005993.5    | Encephalopathy, progressive, early-onset, with brain atrophy and thin corpus callosum, 617193 (3)                                                                                                                                                                                                                                  | Unknown   | 0.0 | 1.8  |
| <i>TBCE</i>     | NM_003193.5    | Kenny-Caffey Syndrome, Type 1 (KCS1); Hypoparathyroidism-Retardation-Dysmorphism Syndrome (HRD)                                                                                                                                                                                                                                    | No        | 0.0 | 0.1  |
| <i>TBCK</i>     | NM_001163435.3 | Hypotonia, infantile, with psychomotor retardation and characteristic facies 3, 616900 (3)                                                                                                                                                                                                                                         | Unknown   | 0.0 | 0.5  |
| <i>TBL1XR1†</i> | NM_024665.7    | Intellectual Developmental Disorder, autosomal dominant 41, 616944 (3); Pierpont syndrome, 602342 (3)                                                                                                                                                                                                                              | Yes       | 1.0 | 4.2  |
| <i>TBR1†</i>    | NM_006593.4    | Intellectual developmental disorder with autism and speech delay, 606053 (3)                                                                                                                                                                                                                                                       | Yes       | 1.0 | 3.6  |
| <i>TBX1†</i>    | NM_001379200.1 | Conotruncal Heart Malformations (CTHM); Velocardiofacial Syndrome; DiGeorge Syndrome (DGS)                                                                                                                                                                                                                                         | Unknown   | 0.8 | 0.7  |
| <i>TBX19</i>    | NM_005149.3    | ACTH Deficiency, Isolated (IAD)                                                                                                                                                                                                                                                                                                    | Unknown   | 0.0 | 0.6  |
| <i>TCF4†</i>    | NM_001083962.2 | Pitt-Hopkins Syndrome (PTHS)                                                                                                                                                                                                                                                                                                       | Yes       | 1.0 | 4.1  |
| <i>TCTN1</i>    | NM_001082538.3 | Joubert Syndrome 13 (JBTS13)                                                                                                                                                                                                                                                                                                       | No        | 0.0 | 0.6  |
| <i>TCTN2</i>    | NM_024809.5    | Meckel Syndrome, Type 8 (MKS8)                                                                                                                                                                                                                                                                                                     | No        | 0.0 | 0.2  |
| <i>TCTN3</i>    | NM_015631.6    | Joubert Syndrome 18 (JBTS18); Orofaciodigital Syndrome IV (OFD4)                                                                                                                                                                                                                                                                   | Unknown   | 0.0 | 0.8  |
| <i>TDGF1</i>    | NM_003212.4    | Teratocarcinoma-Derived Growth Factor 1 (TDGF1)                                                                                                                                                                                                                                                                                    | Uncertain | 0.0 | -0.1 |
| <i>TDP2</i>     | NM_016614.3    | Spinocerebellar ataxia, autosomal recessive 23, 616949 (3)                                                                                                                                                                                                                                                                         | Unknown   | 0.0 | 0.1  |
| <i>TECPR2</i>   | NM_014844.5    | Spastic Paraplegia 49, Autosomal Recessive (SPG49)                                                                                                                                                                                                                                                                                 | No        | 0.6 | 1.7  |
| <i>TECR</i>     | NM_138501.6    | Intellectual Developmental Disorder, Autosomal Recessive 14 (MRT14)                                                                                                                                                                                                                                                                | Unknown   | 0.1 | 1.8  |
| <i>TELO2</i>    | NM_016111.4    | You-Hoover-Fong syndrome, 616954 (3)                                                                                                                                                                                                                                                                                               | Unknown   | 0.0 | -0.4 |
| <i>TET3</i>     | NM_001287491.2 | Beck-Fahrner syndrome, 618798 (3)                                                                                                                                                                                                                                                                                                  | Unknown   | 1.0 | 2.9  |
| <i>TGDS</i>     | NM_014305.4    | Catell-Manzke syndrome, 616145 (3)                                                                                                                                                                                                                                                                                                 | Unknown   | 0.0 | 0.3  |
| <i>TGFB1</i>    | NM_000660.7    | Camurati-Engelmann Disease (CAEND)                                                                                                                                                                                                                                                                                                 | Unknown   | 0.0 | 1.9  |
| <i>TGFB2†</i>   | NM_003242.6    | Colorectal Cancer, Hereditary Nonpolyposis, Type 6 (HNPCC6); Loeys-Dietz Syndrome, Type 2B (LDS2B); Loeys-Dietz Syndrome, Type 1B (LDS1B); Esophageal Cancer                                                                                                                                                                       | Unknown   | 0.1 | 2.2  |
| <i>TGIF1</i>    | NM_003244.4    | Holoprosencephaly 4 (HPE4)                                                                                                                                                                                                                                                                                                         | Yes       | 0.0 | 0.2  |
| <i>THOC2</i>    | NM_001081550.2 | Intellectual Developmental Disorder, X-linked 12/35, 300957 (3)                                                                                                                                                                                                                                                                    | Unknown   | 1.0 | 5.5  |
| <i>TIMM50</i>   | NM_001001563.5 | 3-methylglutaconic aciduria, type IX, 617698 (3)                                                                                                                                                                                                                                                                                   | Unknown   | 0.0 | 0.0  |
| <i>TK2</i>      | NM_004614.5    | Mitochondrial DNA Depletion Syndrome 2 (Myopathic Type) (MTDPS2)                                                                                                                                                                                                                                                                   | Unknown   | 0.0 | 0.2  |
| <i>TMEM138</i>  | NM_016464.5    | Joubert Syndrome 16 (JBTS16)                                                                                                                                                                                                                                                                                                       | Unknown   | 0.0 | 0.5  |

|                 |                |                                                                                                                                                                                                             |           |     |      |
|-----------------|----------------|-------------------------------------------------------------------------------------------------------------------------------------------------------------------------------------------------------------|-----------|-----|------|
| <i>TMEM165</i>  | NM_018475.5    | Congenital Disorder of Glycosylation, Type Iik (CDG2K)                                                                                                                                                      | Unknown   | 0.3 | 1.4  |
| <i>TMEM216</i>  | NM_001173990.3 | Joubert syndrome 2, 608091 (3); Meckel syndrome 2, 603194 (3)                                                                                                                                               | Unknown   | 0.0 | 0.5  |
| <i>TMEM231</i>  | NM_001077418.3 | Joubert Syndrome 20 (JBTS20)                                                                                                                                                                                | No        | 0.0 | -0.4 |
| <i>TMEM237</i>  | NM_001044385.3 | Joubert Syndrome 14 (JBTS14)                                                                                                                                                                                | No        | 0.0 | 0.1  |
| <i>TMEM67</i>   | NM_153704.6    | Nephronophthisis 11 (NPHP11); Joubert Syndrome 6 (JBTS6); Meckel Syndrome, Type 3 (MKS3); Coach Syndrome; Bardet-Biedl Syndrome (BBS)                                                                       | No        | 0.0 | 0.5  |
| <i>TMEM70</i>   | NM_017866.6    | Mitochondrial Complex V (Atp Synthase) Deficiency, Nuclear Type 2                                                                                                                                           | Unknown   | 0.0 | 0.1  |
| <i>TMLHE</i>    | NM_018196.4    | Epsilon-Trimethyllysine Hydroxylase Deficiency (TMLHED); Epsilon-Trimethyllysine Hydroxylase Deficiency (TMLHED)                                                                                            | Uncertain | 0.0 | 0.6  |
| <i>TMX2</i>     | NM_015959.4    | Neurodevelopmental disorder with microcephaly, cortical malformations, and spasticity, 618730 (3)                                                                                                           | Unknown   | 0.6 | 0.2  |
| <i>TNK2</i>     | NM_001382273.1 | severe autosomal recessive infantile onset epilepsy;EE                                                                                                                                                      | Unknown   | 0.0 | -0.2 |
| <i>TPK1</i>     | NM_022445.4    | Thiamine Metabolism Dysfunction Syndrome 5 (Episodic Encephalopathy)                                                                                                                                        | No        | 0.1 | 0.3  |
| <i>TPP1</i>     | NM_000391.4    | Ceroid Lipofuscinosis, Neuronal, 2 (CLN2)                                                                                                                                                                   | Unknown   | 0.0 | -0.2 |
| <i>TRAF3IP2</i> | NM_147686.4    | Psoriasis Susceptibility 13 (PSORS13)                                                                                                                                                                       | Unknown   | 0.0 | 1.6  |
| <i>TRAF7</i>    | NM_032271.3    | Cardiac, facial, and digital anomalies with developmental delay, 618164 (3)                                                                                                                                 | Unknown   | 0.0 | 3.3  |
| <i>TRAK1</i>    | NM_001042646.3 | Epileptic encephalopathy, early infantile, 68, 618201 (3)                                                                                                                                                   | Unknown   | 0.0 | 1.1  |
| <i>TRAPPC12</i> | NM_016030.6    | Encephalopathy, progressive, early-onset, with brain atrophy and spasticity, 617669 (3)                                                                                                                     | Unknown   | 0.0 | 0.2  |
| <i>TRAPPC4</i>  | NM_016146.6    | Neurodevelopmental disorder with epilepsy, spasticity, and brain atrophy, 618741 (3)                                                                                                                        | Unknown   | 0.0 | 0.4  |
| <i>TRAPPC6B</i> | NM_001079537.2 | Neurodevelopmental disorder with microcephaly, epilepsy, and brain atrophy, 617862 (3)                                                                                                                      | Unknown   | 0.0 | 0.1  |
| <i>TRAPPC9</i>  | NM_001160372.4 | Intellectual Developmental Disorder, Autosomal Recessive 13 (MRT13)                                                                                                                                         | No        | 0.0 | 1.5  |
| <i>TREM2</i>    | NM_018965.4    | Polycystic Lipomembranous Osteodysplasia with Sclerosing Leukoencephalopathy                                                                                                                                | Unknown   | 0.0 | 0.2  |
| <i>TREX1</i>    | NM_033629.6    | Chilblain Lupus 1 (CHBL1); Aicardi-Goutieres Syndrome 1 (AGS1); Vasculopathy, Retinal, With Cerebral Leukodystrophy (RVCL); Systemic Lupus Erythematosus (SLE)                                              | Unknown   | 0.6 | -0.8 |
| <i>TRIM8</i>    | NM_030912.3    | Early-onset epileptic encephalopathy (EOEE);EE;Seizures                                                                                                                                                     | Unknown   | 1.0 | 2.7  |
| <i>TRIO</i>     | NM_007118.4    | Intellectual developmental disorder, autosomal dominant 44, with microcephaly, 617061 (3); Intellectual developmental disorder, autosomal dominant 63, with macrocephaly, 618825 (3)                        | Yes       | 1.0 | 5.3  |
| <i>TRIP13</i>   | NM_004237.4    | Mosaic variegated aneuploidy syndrome 3, 617598 (3); Oocyte maturation defect 9, 619011 (3)                                                                                                                 | Unknown   | 1.0 | 2.3  |
| <i>TRIT1</i>    | NM_017646.6    | Combined oxidative phosphorylation deficiency 35, 617873 (3)                                                                                                                                                | Unknown   | 0.0 | 0.8  |
| <i>TRMT10A</i>  | NM_001134665.3 | Microcephaly, short stature, and impaired glucose metabolism 1                                                                                                                                              | No        | 0.0 | 0.4  |
| <i>TRNT1</i>    | NM_182916.3    | Sideroblastic anemia with B-cell immunodeficiency, periodic fevers, and developmental delay, 616084 (3); Retinitis pigmentosa and erythrocytic microcytosis, 616959 (3) pseudogenes on chromosomes 1 and 22 | Unknown   | 0.0 | -1.1 |
| <i>TRPM3</i>    | NM_001366145.2 | Generalized hypotonia;Global developmental delay;Intellectual disability;Seizures;Autistic behavior                                                                                                         | Unknown   | 0.0 | 3.2  |
| <i>TRPM6</i>    | NM_017662.5    | Hypomagnesemia 1, Intestinal (HOMG1)                                                                                                                                                                        | Unknown   | 0.0 | 1.6  |
| <i>TRRAP</i>    | NM_001375524.1 | Developmental delay with or without dysmorphic facies and autism, 618454 (3); Deafness, autosomal dominant 75, 618778 (3) mutation identified in 1 DFNA75 family                                            | Uncertain | 1.0 | 8.2  |
| <i>TSC1</i>     | NM_000368.5    | Focal Cortical Dysplasia of Taylor (FCDT); Tuberous Sclerosis 1 (TSC1)                                                                                                                                      | Unknown   | 1.0 | 2.3  |
| <i>TSC2</i>     | NM_000548.5    | Tuberous sclerosis 2, 613254 (3); Lymphangiomyomatosis, somatic, 606690 (3); Focal cortical dysplasia, type II, somatic, 607341 (3) somatic mutation identified in 1 FCORD2 patient                         | Yes       | 1.0 | -0.3 |
| <i>TSEN15</i>   | NM_052965.4    | Pontocerebellar hypoplasia, type 2F                                                                                                                                                                         | Unknown   | 0.3 | 1.2  |
| <i>TSEN2</i>    | NM_025265.4    | Pontocerebellar Hypoplasia, Type 2B (PCH2B)                                                                                                                                                                 | No        | 0.0 | -1.0 |
| <i>TSEN34</i>   | NM_001077446.4 | Pontocerebellar Hypoplasia, Type 2C (PCH2C);                                                                                                                                                                | Unknown   | 0.4 | -1.0 |
| <i>TSEN54</i>   | NM_207346.3    | Pontocerebellar Hypoplasia, Type 2A (PCH2A); Pontocerebellar Hypoplasia, Type 4 (PCH4)                                                                                                                      | Unknown   | 0.0 | -0.1 |
| <i>TSMF</i>     | NM_005726.6    | Combined Oxidative Phosphorylation Deficiency 3 (COXP3)                                                                                                                                                     | Unknown   | 0.0 | -0.2 |
| <i>TSPAN7</i>   | NM_004615.4    | Intellectual Developmental Disorder, X-Linked 58 (MRX58)                                                                                                                                                    | Unknown   | 0.7 | 1.9  |
| <i>TUBA1A</i>   | NM_006009.4    | Lissencephaly 3 (LIS3)                                                                                                                                                                                      | Unknown   | 1.0 | 5.6  |
| <i>TUBA3E</i>   | NM_207312.3    | Global developmental delay, primary microcephaly, lissencephaly, epilepsy                                                                                                                                   | Unknown   | 0.0 | -0.3 |

|                |                |                                                                                                                                                                                                                                           |         |     |      |
|----------------|----------------|-------------------------------------------------------------------------------------------------------------------------------------------------------------------------------------------------------------------------------------------|---------|-----|------|
| <i>TUBB2A</i>  | NM_001069.3    | Cortical dysplasia, complex, with other brain malformations 5, 615763 (3)                                                                                                                                                                 | Unknown | 0.9 | 5.3  |
| <i>TUBB2B</i>  | NM_178012.5    | Polymicrogyria, Symmetric or Asymmetric (PMGYSA)                                                                                                                                                                                          | Unknown | 1.0 | 5.1  |
| <i>TUBB3</i>   | NM_006086.4    | Cortical Dysplasia, Complex, With Other Brain Malformations 1 (CDCBM1); Fibrosis Of Extraocular Muscles, Congenital, 3A, With Or Without Extraocular                                                                                      | Unknown | 1.0 | 4.6  |
| <i>TUBB4A</i>  | NM_006087.4    | Leukodystrophy, Hypomyelinating, 6 (HLD6); Dystonia 4, Torsion, Autosomal Dominant (DYT4)                                                                                                                                                 | Unknown | 0.1 | 4.3  |
| <i>TUBG1</i>   | NM_001070.5    | Cortical dysplasia, complex, with other brain malformations 4, 615412 (3)                                                                                                                                                                 | Unknown | 0.1 | 4.2  |
| <i>TUBGCP4</i> | NM_014444.5    | Microcephaly and chorioretinopathy, autosomal recessive, 3, 616335 (3)                                                                                                                                                                    | Unknown | 0.0 | 2.6  |
| <i>TUBGCP6</i> | NM_020461.4    | Microcephaly And Chorioretinopathy with or without Impaired Intellectual Development                                                                                                                                                      | No      | 0.0 | -0.9 |
| <i>TUSC3</i>   | NM_006765.4    | Intellectual Developmental Disorder, Autosomal Recessive 7 (MRT7)                                                                                                                                                                         | Unknown | 0.0 | 0.0  |
| <i>TXN2</i>    | NM_012473.4    | Combined oxidative phosphorylation deficiency 29, 616811 (3) mutation identified in 1 COXPD29 patient                                                                                                                                     | Unknown | 0.0 | 0.6  |
| <i>TYROBP</i>  | NM_003332.4    | Polycystic Lipomembranous Osteodysplasia with Sclerosing Leukoencephalopathy                                                                                                                                                              | No      | 0.2 | -0.3 |
| <i>UBA5</i>    | NM_024818.6    | Epileptic encephalopathy, early infantile, 44, 617132 (3); Spinocerebellar ataxia, autosomal recessive 24, 617133 (3) mutation identified in 1 SCAR24 family                                                                              | Unknown | 0.0 | 1.3  |
| <i>UBE2A</i>   | NM_003336.4    | Intellectual Developmental Disorder, X-Linked, Syndromic, Nascimento Type (MRXSN)                                                                                                                                                         | Yes     | 0.8 | 2.5  |
| <i>UBE3A†</i>  | NM_130839.5    | Angelman Syndrome (AS)                                                                                                                                                                                                                    | Yes     | 1.0 | 4.4  |
| <i>UBTF</i>    | NM_014233.4    | Neurodegeneration, childhood-onset, with brain atrophy, 617672 (3)                                                                                                                                                                        | Unknown | 1.0 | 4.7  |
| <i>UFC1</i>    | NM_016406.4    | Neurodevelopmental disorder with spasticity and poor growth, 618076 (3)                                                                                                                                                                   | Unknown | 0.0 | 0.2  |
| <i>UFM1</i>    | NM_016617.4    | Leukodystrophy, hypomyelinating, 14                                                                                                                                                                                                       | Unknown | 0.2 | 0.6  |
| <i>UGDH</i>    | NM_003359.4    | Epileptic encephalopathy, early infantile, 84, 618792 (3)                                                                                                                                                                                 | Unknown | 0.0 | 2.3  |
| <i>UGP2</i>    | NM_006759.4    | Epileptic encephalopathy, early infantile, 83, 618744 (3)                                                                                                                                                                                 | Unknown | 0.0 | 1.9  |
| <i>UNC13D</i>  | NM_199242.3    | Hemophagocytic Lymphohistiocytosis, Familial, 3 (FHL3)                                                                                                                                                                                    | Unknown | 0.0 | -0.2 |
| <i>UNC80</i>   | NM_001371986.1 | Hypotonia, infantile, with psychomotor retardation and characteristic facies 2, 616801 (3)                                                                                                                                                | Unknown | 0.1 | 5.5  |
| <i>UPB1</i>    | NM_016327.3    | Beta-Ureidopropionase Deficiency                                                                                                                                                                                                          | Unknown | 0.0 | -0.9 |
| <i>UPF3B</i>   | NM_080632.3    | Intellectual Developmental Disorder, X-Linked, Syndromic 14 (MRXS14)                                                                                                                                                                      | Yes     | 1.0 | 1.8  |
| <i>UQCC2</i>   | NM_032340.4    | Mitochondrial complex III deficiency, nuclear type 7, 615824 (3)                                                                                                                                                                          | Unknown | 0.0 | 0.5  |
| <i>USP7</i>    | NM_003470.3    | Hao-Fountain syndrome, 616863 (3)                                                                                                                                                                                                         | Unknown | 1.0 | 5.6  |
| <i>USP9X</i>   | NM_001039591.3 | Intellectual Developmental Disorder, X-linked 99, 300919 (3); Intellectual Developmental Disorder, X-linked 99, syndromic, female-restricted, 300968 (3)                                                                                  | Yes     | 1.0 | 6.4  |
| <i>VAMP2</i>   | NM_014232.3    | Neurodevelopmental disorder with hypotonia and autistic features with or without hyperkinetic movements, 618760 (3)                                                                                                                       | Unknown | 0.9 | 1.4  |
| <i>VARS</i>    | NM_006295.3    | Neurodevelopmental Disorder with Microcephaly, Seizures, and Cortical Atrophy, 617802 (3)                                                                                                                                                 | Unknown | 0.0 | 2.7  |
| <i>VARS1</i>   | NM_006295.3    | Neurodevelopmental Disorder with Microcephaly, Seizures, and Cortical Atrophy                                                                                                                                                             | Unknown | N/A | N/A  |
| <i>VCP</i>     | NM_007126.5    | Inclusion body myopathy with early-onset Paget disease and frontotemporal dementia 1, 167320 (3); Amyotrophic lateral sclerosis 14, with or without frontotemporal dementia, 613954 (3); Charcot-Marie-Tooth disease, type 2Y, 616687 (3) | Unknown | 1.0 | 5.4  |
| <i>VDR</i>     | NM_000376.3    | Mycobacterium Tuberculosis, Susceptibility To; Vitamin D-Dependent Rickets, Type 2A (VDDR2A)                                                                                                                                              | Unknown | 0.0 | 1.1  |
| <i>VLDLR</i>   | NM_003383.5    | Cerebellar Hypoplasia and Intellectual Developmental Disorder with or without quadrupedal locomotion 1, 224050 (3)                                                                                                                        | Unknown | 0.0 | -1.1 |
| <i>VPS11</i>   | NM_021729.6    | Leukodystrophy, hypomyelinating, 12, 616683 (3)                                                                                                                                                                                           | Unknown | 0.0 | 2.3  |
| <i>VPS13A</i>  | NM_033305.3    | Choreoacanthocytosis (CHAC)                                                                                                                                                                                                               | Unknown | 0.0 | 1.8  |
| <i>VPS13B</i>  | NM_152564.5    | Cohen syndrome, 216550 (3)                                                                                                                                                                                                                | No      | 0.0 | 1.0  |
| <i>VPS53</i>   | NM_001128159.3 | Pontocerebellar hypoplasia, type 2E, 615851 (3)                                                                                                                                                                                           | Unknown | 0.0 | 1.6  |
| <i>WAC</i>     | NM_016628.5    | Desanto-Shinawi syndrome, 616708 (3)                                                                                                                                                                                                      | Yes     | 1.0 | 1.5  |
| <i>WARS2</i>   | NM_015836.4    | Neurodevelopmental disorder, mitochondrial, with abnormal movements and lactic acidosis, with or without seizures, 617710 (3)                                                                                                             | Unknown | 0.1 | 0.9  |
| <i>WASF1†</i>  | NM_003931.3    | Neurodevelopmental disorder with absent language and variable seizures, 618707 (3)                                                                                                                                                        | Unknown | 1.0 | 2.5  |
| <i>WASHC4</i>  | NM_015275.3    | Intellectual Developmental Disorder, Autosomal Recessive 43                                                                                                                                                                               | Unknown | N/A | N/A  |
| <i>WDR11</i>   | NM_018117.12   | Hypogonadotropic Hypogonadism 14 with or without Anosmia (HH14)                                                                                                                                                                           | Unknown | 0.0 | 1.8  |
| <i>WDR26†</i>  | NM_001379403.1 | Skraban-Deardorff syndrome, 617616 (3)                                                                                                                                                                                                    | Unknown | 1.0 | 3.6  |

|                      |                |                                                                                                                                                                   |           |     |      |
|----------------------|----------------|-------------------------------------------------------------------------------------------------------------------------------------------------------------------|-----------|-----|------|
| WDR37                | NM_014023.4    | Neurooculocardiogenitourinary syndrome, 618652 (3)                                                                                                                | Unknown   | 0.6 | 2.3  |
| WDR4                 | NM_018669.6    | Microcephaly, growth deficiency, seizures, and brain malformations, 618346 (3); Galloway-Mowat syndrome 6, 618347 (3)                                             | Unknown   | 0.0 | -1.0 |
| WDR45                | NM_001029896.2 | Neurodegeneration With Brain Iron Accumulation 5 (NBIA5); Neurodegeneration with Brain Iron Accumulation 5 (NBIA5)                                                | Yes       | 1.0 | 2.0  |
| WDR45B               | NM_019613.4    | Neurodevelopmental disorder with spastic quadriplegia and brain abnormalities with or without seizures, 617977 (3)                                                | Unknown   | 0.2 | 1.0  |
| WDR62                | NM_001083961.2 | Microcephaly 2, Primary, Autosomal Recessive, with or without Cortical                                                                                            | Unknown   | 0.0 | 0.7  |
| WDR73                | NM_032856.5    | Galloway-Mowat syndrome 1, 251300 (3)                                                                                                                             | Unknown   | 0.0 | -0.5 |
| WDR81                | NM_001163809.2 | Cerebellar ataxia, Intellectual Developmental Disorder, and dysequilibrium syndrome 2, 610185 (3); Hydrocephalus, congenital, 3, with brain anomalies, 617967 (3) | Unknown   | 0.0 | 2.1  |
| WFS1                 | NM_006005.3    | Wolfram-Like Syndrome, Autosomal Dominant (WFSL); Deafness, Autosomal Dominant 6 (DFNA6); Wolfram Syndrome 1 (WFS1)                                               | Unknown   | 0.0 | -4.7 |
| WVOX                 | NM_016373.4    | Esophageal Cancer                                                                                                                                                 | No        | 0.0 | -4.4 |
| XK                   | NM_021083.4    | Mcleod Syndrome (MCLDS); Mcleod Syndrome (MCLDS)                                                                                                                  | Unknown   | 1.0 | 2.1  |
| XPA                  | NM_000380.4    | Xeroderma Pigmentosum, Complementation Group A (XPA)                                                                                                              | No        | 0.0 | 0.3  |
| XPC                  | NM_004628.5    | Xeroderma pigmentosum, group C, 278720 (3)                                                                                                                        | Unknown   | 0.0 | 0.7  |
| XPNPEP3              | NM_022098.4    | Nephronophthisis-Like Nephropathy 1 (NPHPL1)                                                                                                                      | No        | 0.0 | -0.1 |
| YWHAG <sup>†</sup>   | NM_012479.4    | Epileptic encephalopathy, early infantile, 56, 617665 (3)                                                                                                         | Unknown   | 1.0 | 3.0  |
| ZBTB18 <sup>†</sup>  | NM_205768.3    | Intellectual Developmental Disorder, autosomal dominant 22, 612337 (3)                                                                                            | Yes       | 1.0 | 3.4  |
| ZC3H14               | NM_024824.5    | Intellectual Developmental Disorder, autosomal recessive 56, 617125 (3)                                                                                           | Unknown   | 0.9 | 1.5  |
| ZC4H2                | NM_018684.4    | Wieacker-Wolff syndrome, 314580 (3); Wieacker-Wolff syndrome, female-restricted, 301041 (3)                                                                       | Yes       | 0.9 | 1.5  |
| ZDHHC9               | NM_016032.4    | Intellectual Developmental Disorder, X-Linked, Syndromic, Raymond Type (MRXSR)                                                                                    | Unknown   | 0.7 | 2.6  |
| ZEB2 <sup>†</sup>    | NM_014795.4    | Mowat-Wilson Syndrome (MOWS)                                                                                                                                      | Yes       | 1.0 | 3.9  |
| ZFP57                | NM_001109809.5 | Diabetes Mellitus, Transient Neonatal, 1                                                                                                                          | Unknown   | 0.0 | 1.4  |
| ZIC2                 | NM_007129.5    | Holoprosencephaly 5 (HPE5)                                                                                                                                        | Yes       | 1.0 | 3.2  |
| ZMIZ1 <sup>†</sup>   | NM_020338.4    | Neurodevelopmental disorder with dysmorphic facies and distal skeletal anomalies, 618659 (3)                                                                      | Unknown   | 1.0 | 3.4  |
| ZMYND11 <sup>†</sup> | NM_001370100.5 | Intellectual Developmental Disorder, autosomal dominant 30, 616083 (3)                                                                                            | Yes       | 1.0 | 3.7  |
| ZNF142               | NM_001379659.1 | Neurodevelopmental disorder with impaired speech and hyperkinetic movements, 618425 (3)                                                                           | Unknown   | 0.0 | 0.2  |
| ZNF335               | NM_022095.4    | Microcephaly 10, Primary, Autosomal Recessive (MCPH10)                                                                                                            | Unknown   | 0.0 | 0.5  |
| ZNF41                | NM_001324144.2 | Intellectual Developmental Disorder, X-Linked 89 (MRX89)                                                                                                          | Uncertain | 0.0 | 1.3  |
| ZNF592               | NM_014630.3    | Spinocerebellar Ataxia, Autosomal Recessive 5 (SCAR5)                                                                                                             | No        | 1.0 | 0.8  |
| ZNF674               | NM_001190417.2 | Intellectual Developmental Disorder, X-Linked 92 (MRX92)                                                                                                          | Uncertain | 0.0 | 1.1  |
| ZNF711               | NM_001330574.2 | Intellectual Developmental Disorder, X-Linked 97 (MRX97)                                                                                                          | Unknown   | 1.0 | 2.4  |
| ZNF81                | NM_007137.5    | Intellectual Developmental Disorder, X-Linked 45 (MRX45)                                                                                                          | Unknown   | 0.6 | 1.4  |
| ZSWIM6 <sup>†</sup>  | NM_020928.2    | Acromelic frontonasal dysostosis, 603671 (3); Neurodevelopmental disorder with movement abnormalities, abnormal gait, and autistic features, 617865 (3)           | Unknown   | 1.0 | 4.2  |

**eTable 3. Nondiagnostic VUS in Epilepsy-Related Genes**

| Loss-of-function variants |             |                     |                                                             |       |                 |        |          |            |     |
|---------------------------|-------------|---------------------|-------------------------------------------------------------|-------|-----------------|--------|----------|------------|-----|
| Gene                      | DNA         | Protein             | Consequence/ <i>In silico</i> prediction                    | Cases | Seizure onset   | Sex    | Epilepsy | ID         | ASD |
| CACNA1B                   | c.925C>T    | p.Gln309Ter         | Stop gained                                                 | 0316  | 5y              | male   | DEE      | Mild       | No  |
| CACNA1B                   | c.4711C>T   | p.Arg1571Ter        | Stop gained                                                 | 0736  | 3y              | male   | GGE      | N          | No  |
| CCM2                      | c.632dupT   | p.Glu212GlyfsTer45  | Frameshift                                                  | 0724  | 2y11m           | male   | GGE      | N          | No  |
| POGZ                      | c.885A>G    |                     | Splice acceptor                                             | 0847  | infantile onset | male   | DEE      | N          | No  |
| PUM1                      | c.1253-4G>T |                     | Splice acceptor                                             | 0852  | 2y              | female | NAFE     | N          | No  |
| PUM1                      | c.3552delT  | p.Asn1185MetfsTer34 | Frameshift                                                  | 0833  | 7y              | male   | NAFE     | Moderate   | Yes |
| TANC2                     | c.211+1G>A  |                     | Splice donor                                                | 0499  | 2y6m            | female | Combined | Borderline | Yes |
| SMARCC2                   | c.2217delC  | p.Thr740ArgfsTer17  | Frameshift                                                  | 0590  | 2y              | female | NAFE     | N          | No  |
| Missense variants         |             |                     |                                                             |       |                 |        |          |            |     |
| Gene                      | DNA         | Protein             | Consequence/ <i>In silico</i> prediction                    | Cases | Seizure onset   | Sex    | Epilepsy | ID         | ASD |
| ADNP                      | c.1668G>C   | p.Gln556His         | CADD (23.1), SIFT (D), PolyPhen (P), M-CAP (T), REVEL (0.2) | 0607  | 7y              | female | NAFE     | N          | No  |
| AKT1                      | c.250A>T    | p.Ile84Phe          | CADD (25.8), SIFT (D), PolyPhen (D), M-CAP (D), REVEL (0.8) | 0469  | 3y              | male   | GGE      | Borderline | No  |
| ALX4                      | c.409C>T    | p.Leu137Phe         | CADD (23.9), SIFT (D), PolyPhen (B), M-CAP (D), REVEL (0.3) | 0565  | 1w (at birth)   | male   | DEE      | Profound   | No  |
| ANKRD11                   | c.6437A>C   | p.Lys2146Thr        | CADD (22.8), SIFT (D), PolyPhen (B), M-CAP (D), REVEL (0.2) | 0491  | 1y6m            | male   | DEE      | Mild       | No  |
| ANKRD11                   | c.6950C>T   | p.Pro2317Leu        | CADD (22.7), SIFT (D), PolyPhen (B), M-CAP (D), REVEL (0.1) | 0929  | 7y              | male   | NAFE     | N          | No  |
| ANKRD11                   | c.6970C>G   | p.Pro2324Ala        | CADD (22.5), SIFT (D), PolyPhen (B), M-CAP (D), REVEL (0.1) | 0753  | 2y              | female | Combined | N          | No  |
| ARID1A                    | c.208G>A    | p.Gly70Arg          | CADD (23.9), SIFT (T), PolyPhen (P), M-CAP (D), REVEL (0.1) | 1018  | 3m              | male   | DEE      | Severe     | Yes |
| ARID1A                    | c.3727G>A   | p.Asp1243Asn        | CADD (26.8), SIFT (D), PolyPhen (B), M-CAP (T), REVEL (0.2) | 0600  | 2y              | female | Combined | N          | No  |
| ARID1A                    | c.3974C>G   | p.Pro1325Arg        | CADD (25.1), SIFT (D), PolyPhen (D), M-CAP (T), REVEL (0.2) | 0627  | 2y6m            | male   | NAFE     | Borderline | No  |
| ARID1B                    | c.1337C>T   | p.Ala446Val         | CADD (23.1), SIFT (T), PolyPhen (B), M-CAP (D), REVEL (0)   | 1092  | 4y              | male   | GGE      | N          | No  |
| ARID1B                    | c.6064G>A   | p.Glu2022Lys        | CADD (24), SIFT (D), PolyPhen (B), M-CAP (T), REVEL (0.1)   | 0455  | 7y              | female | IGE      | N          | No  |
| ATN1                      | c.689G>A    | p.Gly230Glu         | CADD (22.8), SIFT (D), PolyPhen (B), M-CAP (D), REVEL (0.4) | 0714  | 6y              | female | IGE      | N          | No  |
| ATP1A2                    | c.1283G>A   | p.Arg428His         | CADD (31), SIFT (D), PolyPhen (D), M-CAP (D), REVEL (0.8)   | 0513  | 11y             | female | GGE      | N          | No  |
| ATP1A3                    | c.2564T>G   | p.Met855Arg         | CADD (25), SIFT (T), PolyPhen (P), M-CAP (D), REVEL (0.9)   | 0721  | 1y              | male   | DEE      | Moderate   | Yes |
| ATP1A3                    | c.488C>A    | p.Ser163Tyr         | CADD (27.2), SIFT (D), PolyPhen (D), M-CAP (D), REVEL (0.9) | 0973  | 9y              | female | IGE      | N          | No  |
| ATXN10                    | c.1115C>T   | p.Ser372Phe         | CADD (26.6), SIFT (D), PolyPhen (D), M-CAP (D), REVEL (0.3) | 0541  | 7y              | male   | GGE      | N          | No  |
| AUTS2                     | c.2956C>T   | p.Arg986Trp         | CADD (25.3), SIFT (D), PolyPhen (D), M-CAP (D), REVEL (0.3) | 0474  | 11m             | male   | GGE      | Borderline | No  |
| CACNA1B                   | c.4384T>C   | p.Tyr1462His        | CADD (26.6), SIFT (D), PolyPhen (D), M-CAP (D), REVEL (0.9) | 0962  | 12y             | male   | GGE      | N          | No  |
| CACNA1E                   | c.5810C>T   | p.Ser1937Leu        | CADD (24.8), SIFT (D), PolyPhen (B), M-CAP (D), REVEL (0.4) | 0890  | 13y             | male   | Combined | N          | No  |
| CACNA1G                   | c.2486G>A   | p.Gly829Asp         | CADD (28.7), SIFT (D), PolyPhen (D), M-CAP (D), REVEL (0.9) | 0431  | 9m              | male   | DEE      | Severe     | No  |
| CCM2                      | c.1206C>G   | p.Asp402Glu         | CADD (25.2), SIFT (D), PolyPhen (D), M-CAP (D), REVEL (0.2) | 0871  | 2y              | male   | Combined | N          | No  |
| CDH15                     | c.1943G>A   | p.Arg648Gln         | CADD (32), SIFT (D), PolyPhen (D), M-CAP (D), REVEL (0.7)   | 0918  | 5y              | male   | NAFE     | N          | No  |
| CDON                      | c.2242G>A   | p.Gly748Ser         | CADD (25.9), SIFT (D), PolyPhen (D), M-CAP (D), REVEL (0.5) | 0702  | 6y              | female | NAFE     | Borderline | No  |



|                |           |              |                                                             |      |                 |        |          |            |     |
|----------------|-----------|--------------|-------------------------------------------------------------|------|-----------------|--------|----------|------------|-----|
| <i>CDON</i>    | c.3208T>C | p.Tyr1070His | CADD (23.4), SIFT (D), PolyPhen (P), M-CAP (D), REVEL (0.1) | 0808 | 3y              | female | NAFE     | N          | No  |
| <i>CHAMP1</i>  | c.2159A>G | p.Lys720Arg  | CADD (26.2), SIFT (D), PolyPhen (D), M-CAP (T), REVEL (0.3) | 1030 | 3m              | female | DEE      | N          | No  |
| <i>CHD1</i>    | c.117T>G  | p.Ser39Arg   | CADD (23.6), SIFT (D), PolyPhen (D), M-CAP (D), REVEL (0.5) | 0458 | 11y             | female | NAFE     | Mild       | Yes |
| <i>CHD2</i>    | c.5211C>G | p.His1737Gln | CADD (24.5), SIFT (D), PolyPhen (D), M-CAP (D), REVEL (0.5) | 0701 | 14y             | female | GGE      | N          | No  |
| <i>CHRNA2</i>  | c.710C>T  | p.Thr237Met  | CADD (26.7), SIFT (D), PolyPhen (P), M-CAP (D), REVEL (0.4) | 0643 | 2y              | female | NAFE     | N          | No  |
| <i>CHRNA4</i>  | c.869T>A  | p.Leu290Gln  | CADD (29.2), SIFT (D), PolyPhen (D), M-CAP (D), REVEL (0.9) | 0691 | 2w              | male   | DEE      | Severe     | No  |
| <i>CIC</i>     | c.6272C>G | p.Ala2091Gly | CADD (25), SIFT (D), PolyPhen (D), M-CAP (D), REVEL (0.1)   | 0847 | infantile onset | male   | IGE      | N          | No  |
| <i>CLTC</i>    | c.1108C>T | p.Arg370Trp  | CADD (27.8), SIFT (D), PolyPhen (D), M-CAP (D), REVEL (0.5) | 0807 | 10m             | female | GGE      | Borderline | No  |
| <i>COL4A2</i>  | c.2453G>A | p.Gly818Glu  | CADD (25.2), SIFT (D), PolyPhen (D), M-CAP (D), REVEL (0.9) | 1019 | 9m              | female | NAFE     | Moderate   | No  |
| <i>COL4A2</i>  | c.2498G>T | p.Gly833Val  | CADD (24.5), SIFT (D), PolyPhen (D), M-CAP (D), REVEL (1)   | 0792 | 2y              | female | NAFE     | N          | No  |
| <i>CREBBP</i>  | c.2810C>G | p.Pro937Arg  | CADD (23.3), SIFT (D), PolyPhen (B), M-CAP (T), REVEL (0.3) | 1036 | 3y              | male   | NAFE     | N          | No  |
| <i>CREBBP</i>  | c.6423C>G | p.Asn2141Lys | CADD (23), SIFT (D), PolyPhen (B), M-CAP (T), REVEL (0.3)   | 0884 | 4y              | male   | NAFE     | Borderline | No  |
| <i>CTNNB1</i>  | c.1760G>A | p.Arg587Gln  | CADD (32), SIFT (D), PolyPhen (D), M-CAP (D), REVEL (0.6)   | 0643 | 2y              | female | NAFE     | N          | No  |
| <i>DEPDC5</i>  | c.1720A>G | p.Arg574Gly  | CADD (24.4), SIFT (D), PolyPhen (D), M-CAP (D), REVEL (0.2) | 0571 | 1y2m            | male   | NAFE     | N          | No  |
| <i>DEPDC5</i>  | c.4675C>T | p.Arg1559Cys | CADD (28.4), SIFT (D), PolyPhen (D), M-CAP (D), REVEL (0.4) | 0676 | 1y              | male   | NAFE     | N          | No  |
| <i>DIAPH1</i>  | c.1409A>G | p.Asp470Gly  | CADD (32), SIFT (D), PolyPhen (D), M-CAP (D), REVEL (0.5)   | 0809 | 1y              | male   | DEE      | Borderline | No  |
| <i>DIAPH1</i>  | c.2378C>T | p.Ser793Phe  | CADD (29.3), SIFT (D), PolyPhen (D), M-CAP (T), REVEL (0.4) | 0432 | 14y             | male   | DEE      | Moderate   | Yes |
| <i>DLL1</i>    | c.105G>C  | p.Lys35Asn   | CADD (24.8), SIFT (T), PolyPhen (D), M-CAP (D), REVEL (0.6) | 0991 | 16y             | male   | GGE      | N          | No  |
| <i>DNMT3A</i>  | c.625C>T  | p.Arg209Cys  | CADD (29.1), SIFT (D), PolyPhen (P), M-CAP (D), REVEL (0.6) | 0622 | 6m              | male   | NAFE     | N          | No  |
| <i>DYNC1H1</i> | c.5417G>A | p.Arg1806Gln | CADD (23.9), SIFT (T), PolyPhen (B), M-CAP (T), REVEL (0.2) | 0668 | 10y             | female | NAFE     | N          | No  |
| <i>DYNC1H1</i> | c.6616A>G | p.Lys2206Glu | CADD (32), SIFT (D), PolyPhen (D), M-CAP (D), REVEL (0.7)   | 0603 | 9y              | female | GGE      | N          | No  |
| <i>EEF1A2</i>  | c.358G>A  | p.Val120Met  | CADD (24.4), SIFT (D), PolyPhen (P), M-CAP (D), REVEL (0.4) | 0927 | 1y              | female | GGE      | N          | Yes |
| <i>EFTUD2</i>  | c.658C>T  | p.Arg220Cys  | CADD (32), SIFT (D), PolyPhen (D), M-CAP (D), REVEL (0.7)   | 1039 | 6y              | female | IGE      | N          | No  |
| <i>EHMT1</i>   | c.110G>A  | p.Gly37Asp   | CADD (21.3), SIFT (T), PolyPhen (B), M-CAP (D), REVEL (0.1) | 0506 | 4y6m            | male   | DEE      | Mild       | No  |
| <i>EPB41L1</i> | c.1479G>C | p.Lys493Asn  | CADD (24.8), SIFT (D), PolyPhen (P), M-CAP (D), REVEL (0.3) | 0438 | 8m              | male   | DEE      | Moderate   | No  |
| <i>FBXO11</i>  | c.173C>T  | p.Pro58Leu   | CADD (22), SIFT (T), PolyPhen (B), M-CAP (D), REVEL (0.3)   | 0968 | 5m              | male   | GGE      | Mild       | No  |
| <i>FGFR1</i>   | c.1486C>T | p.Leu496Phe  | CADD (28.4), SIFT (D), PolyPhen (D), M-CAP (D), REVEL (0.9) | 0919 | 10y             | female | IGE      | N          | No  |
| <i>GABBR2</i>  | c.2737A>G | p.Ser913Gly  | CADD (24.2), SIFT (D), PolyPhen (B), M-CAP (D), REVEL (0.3) | 0731 | 5y              | female | NAFE     | Mild       | No  |
| <i>GABBR2</i>  | c.577C>T  | p.Arg193Cys  | CADD (25.5), SIFT (D), PolyPhen (B), M-CAP (D), REVEL (0.7) | 0525 | 5y              | male   | NAFE     | N          | No  |
| <i>GABBR2</i>  | c.1372C>G | p.Arg458Gly  | CADD (26.8), SIFT (D), PolyPhen (D), M-CAP (D), REVEL (0.5) | 0465 | 4y              | female | Combined | Borderline | No  |
| <i>GABBR3</i>  | c.296A>G  | p.Tyr99Cys   | CADD (29.4), SIFT (D), PolyPhen (D), M-CAP (D), REVEL (0.9) | 0909 | 1y6m            | female | DEE      | Moderate   | Yes |
| <i>GABBR3</i>  | c.428T>G  | p.Leu143Arg  | CADD (28.7), SIFT (D), PolyPhen (D), M-CAP (D), REVEL (0.9) | 0536 | 2y              | male   | GGE      | N          | No  |
| <i>GFAP</i>    | c.836A>G  | p.Lys279Arg  | CADD (26.2), SIFT (T), PolyPhen (P), M-CAP (D), REVEL (0.8) | 1030 | 3m              | female | DEE      | N          | No  |
| <i>GLI3</i>    | c.440A>G  | p.His147Arg  | CADD (23.6), SIFT (T), PolyPhen (P), M-CAP (D), REVEL (0.4) | 0542 | 4y              | female | EE       | Borderline | No  |
| <i>GLI3</i>    | c.4595C>T | p.Ser1532Phe | CADD (29.2), SIFT (D), PolyPhen (D), M-CAP (D), REVEL (0.5) | 0962 | 12y             | male   | GGE      | N          | No  |
| <i>GLUD1</i>   | c.709G>T  | p.Ala237Ser  | CADD (27.8), SIFT (D), PolyPhen (P), M-CAP (D), REVEL (0.8) | 0660 | 5y              | male   | NAFE     | N          | No  |
| <i>GPHN</i>    | c.2114C>T | p.Pro705Leu  | CADD (25.9), SIFT (D), PolyPhen (D), M-CAP (T), REVEL (0.2) | 0920 | 1y              | male   | GGE      | Mild       | Yes |
| <i>GPHN</i>    | c.623C>T  | p.Pro208Leu  | CADD (25), SIFT (D), PolyPhen (D), M-CAP (D), REVEL (0.4)   | 0875 | 4y              | female | NAFE     | N          | No  |

|               |            |              |                                                              |      |           |        |          |            |     |
|---------------|------------|--------------|--------------------------------------------------------------|------|-----------|--------|----------|------------|-----|
| <i>GRIA4</i>  | c.1018G>C  | p.Gly340Arg  | CADD (22.6), SIFT (T), PolyPhen (B), M-CAP (D), REVEL (0.3)  | 0669 | 3y        | male   | GGE      | Borderline | No  |
| <i>GRIN2A</i> | c.1663G>A  | p.Ala555Thr  | CADD (25.9), SIFT (D), PolyPhen (D), M-CAP (D), REVEL (0.2)  | 0592 | 4y        | female | NAFE     | N          | No  |
| <i>GRIN2D</i> | c.2800C>T  | p.Pro934Ser  | CADD (23.5), SIFT (D), PolyPhen (P), M-CAP (D), REVEL (0.1)  | 0426 | 13y       | female | DEE      | Mild       | No  |
| <i>HMBS</i>   | c.61A>T    | p.Ile21Phe   | CADD (24.6), SIFT (T), PolyPhen (P), M-CAP (D), REVEL (0.9)  | 0587 | 8y        | female | Combined | N          | No  |
| <i>IFIH1</i>  | c.2891G>T  | p.Cys964Phe  | CADD (26.2), SIFT (D), PolyPhen (D), M-CAP (D), REVEL (0.8)  | 0523 | 7m        | male   | DEE      | Severe     | No  |
| <i>IFIH1</i>  | c.77T>A    | p.Ile26Asn   | CADD (31), SIFT (D), PolyPhen (P), M-CAP (D), REVEL (0.4)    | 0844 | 3y        | female | NAFE     | N          | No  |
| <i>KAT6A</i>  | c.4058A>G  | p.Asp1353Gly | CADD (23.4), SIFT (T), PolyPhen (P), M-CAP (D), REVEL (0.2)  | 0791 | 3y        | female | DEE      | Mild       | No  |
| <i>KAT6B</i>  | c.2992T>A  | p.Ser998Thr  | CADD (25), SIFT (D), PolyPhen (D), M-CAP (D), REVEL (0.3)    | 0920 | 1y        | male   | GGE      | Mild       | Yes |
| <i>KAT6B</i>  | c.786A>T   | p.Leu262Phe  | CADD (25), SIFT (D), PolyPhen (D), M-CAP (D), REVEL (0.5)    | 0503 | 5m        | female | DEE      | Severe     | No  |
| <i>KCNA1</i>  | c.1126G>A  | p.Gly376Ser  | CADD (29.2), SIFT (D), PolyPhen (D), M-CAP (D), REVEL (0.97) | 0638 | 4y        | male   | NAFE     | N          | No  |
| <i>KCNA1</i>  | c.1217T>A  | p.Val406Asp  | CADD (29.5), SIFT (D), PolyPhen (D), M-CAP (D), REVEL (1)    | 1043 | 11m       | male   | DEE      | Severe     | Yes |
| <i>KCNH2</i>  | c.1979C>T  | p.Ser660Leu  | CADD (32), SIFT (D), PolyPhen (D), M-CAP (D), REVEL (0.9)    | 0627 | 2y6m      | male   | NAFE     | Borderline | No  |
| <i>KCNH2</i>  | c.788C>G   | p.Ser263Cys  | CADD (23.4), SIFT (D), PolyPhen (B), M-CAP (D), REVEL (0.6)  | 0701 | 14y       | female | GGE      | N          | No  |
| <i>KCNT1</i>  | c.2131G>A  | p.Ala711Thr  | CADD (24.0), SIFT (D), PolyPhen (D), M-CAP (T), REVEL (0.2)  | 0713 | 1y5m      | male   | DEE      | Mild       | Yes |
| <i>KCNQ2</i>  | c.200C>G   | p.Pro67Arg   | CADD (26.3), SIFT (I), PolyPhen (I), M-CAP (D), REVEL (0.7)  | 1050 | 6m        | male   | DEE      | Severe     | No  |
| <i>KCNQ5</i>  | c.767G>C   | p.Gly256Ala  | CADD (26.3), SIFT (D), PolyPhen (P), M-CAP (D), REVEL (0.8)  | 0566 | 2m        | male   | DEE      | Moderate   | No  |
| <i>KDM4B</i>  | c.2360G>A  | p.Arg787Gln  | CADD (27.8), SIFT (D), PolyPhen (D), M-CAP (D), REVEL (0.8)  | 0710 | 8y        | female | GGE      | N          | No  |
| <i>KDM4B</i>  | c.2755G>A  | p.Val919Met  | CADD (23.5), SIFT (T), PolyPhen (B), M-CAP (T), REVEL (0.1)  | 0475 | 2y        | male   | DEE      | Moderate   | No  |
| <i>KIF5A</i>  | c.2695C>T  | p.Arg899Cys  | CADD (31), SIFT (D), PolyPhen (D), M-CAP (D), REVEL (0.7)    | 0548 | 7y6m      | male   | Combined | Borderline | No  |
| <i>KMT2A</i>  | c.10700C>T | p.Ser3567Phe | CADD (24.5), SIFT (T), PolyPhen (D), M-CAP (D), REVEL (0.3)  | 1006 | 14y       | male   | GGE      | Borderline | No  |
| <i>KMT2A</i>  | c.2614A>C  | p.Lys872Gln  | CADD (25.1), SIFT (D), PolyPhen (P), M-CAP (T), REVEL (0.2)  | 0551 | 1y6m      | female | DEE      | Mild       | No  |
| <i>KMT2A</i>  | c.8065A>G  | p.Arg2689Gly | CADD (24.7), SIFT (D), PolyPhen (D), M-CAP (D), REVEL (0.8)  | 0531 | 5y        | female | NAFE     | Mild       | No  |
| <i>KMT2A</i>  | c.8149A>G  | p.Ile2717Val | CADD (24.9), SIFT (D), PolyPhen (D), M-CAP (D), REVEL (0.5)  | 1050 | 6m        | male   | DEE      | Severe     | No  |
| <i>KMT2A</i>  | c.9137A>C  | p.Asn3046Thr | CADD (22.8), SIFT (D), PolyPhen (B), M-CAP (D), REVEL (0.3)  | 0636 | 1y3m      | female | DEE      | Moderate   | No  |
| <i>KMT2D</i>  | c.10471C>T | p.Arg3491Cys | CADD (25.2), SIFT (D), PolyPhen (B), M-CAP (D), REVEL (0.4)  | 0889 | 4y        | female | GGE      | N          | No  |
| <i>KMT2D</i>  | c.3077C>T  | p.Pro1026Leu | CADD (21.8), SIFT (D), PolyPhen (B), M-CAP (D), REVEL (0.2)  | 0605 | 2y        | female | NAFE     | N          | No  |
| <i>KMT2D</i>  | c.5899G>A  | p.Gly1967Ser | CADD (23.1), SIFT (T), PolyPhen (P), M-CAP (D), REVEL (0.4)  | 0715 | 6y        | female | GGE      | N          | No  |
| <i>KMT2D</i>  | c.9815C>T  | p.Pro3272Leu | CADD (22), SIFT (T), PolyPhen (B), M-CAP (D), REVEL (0.4)    | 1063 | 9y        | female | GGE      | N          | No  |
| <i>KMT2E</i>  | c.3955A>C  | p.Ser1319Arg | CADD (22.2), SIFT (T), PolyPhen (B), M-CAP (D), REVEL (0.2)  | 0933 | 8y        | female | NAFE     | N          | No  |
| <i>KMT2E</i>  | c.4879C>T  | p.Pro1627Ser | CADD (22.8), SIFT (D), PolyPhen (D), M-CAP (D), REVEL (0.4)  | 0779 | 1y1m      | male   | Combined | N          | No  |
| <i>MACF1</i>  | c.14124C>A | p.Phe4708Leu | CADD (27.8), SIFT (D), PolyPhen (D), M-CAP (D), REVEL (0.6)  | 0845 | 12y       | female | Combined | N          | No  |
| <i>MACF1</i>  | c.16030C>T | p.Arg5344Trp | CADD (26), SIFT (T), PolyPhen (D), M-CAP (D), REVEL (0.2)    | 0962 | 12y       | male   | GGE      | N          | No  |
| <i>MACF1</i>  | c.4171C>T  | p.Arg1391Cys | CADD (31), SIFT (D), PolyPhen (D), M-CAP (D), REVEL (0.4)    | 0829 | infantile | male   | DEE      | Moderate   | Yes |
| <i>MAF</i>    | c.343G>C   | p.Glu115Gln  | CADD (26.4), SIFT (D), PolyPhen (D), M-CAP (D), REVEL (0.6)  | 0592 | 4y        | female | NAFE     | N          | No  |
| <i>MAST1</i>  | c.4180G>T  | p.Val1394Leu | CADD (23.2), SIFT (D), PolyPhen (B), M-CAP (D), REVEL (0.1)  | 0592 | 4y        | female | NAFE     | N          | No  |
| <i>MED13L</i> | c.2054A>G  | p.Asp685Gly  | CADD (24), SIFT (D), PolyPhen (B), M-CAP (T), REVEL (0.1)    | 0876 | 2y6m      | male   | GGE      | N          | No  |
| <i>MYH3</i>   | c.2147A>G  | p.Tyr716Cys  | CADD (31), SIFT (D), PolyPhen (D), M-CAP (D), REVEL (0.9)    | 0989 | 5y        | female | IGE      | N          | No  |
| <i>MYT1L</i>  | c.1810G>A  | p.Val604Met  | CADD (25), SIFT (D), PolyPhen (D), M-CAP (D), REVEL (0.1)    | 0543 | 12y       | male   | GGE      | N          | No  |

|                |           |              |                                                             |      |                 |        |          |            |     |
|----------------|-----------|--------------|-------------------------------------------------------------|------|-----------------|--------|----------|------------|-----|
| <i>NBEA</i>    | c.197C>T  | p.Pro66Leu   | CADD (28.9), SIFT (D), PolyPhen (D), M-CAP (D), REVEL (0.4) | 0974 | 9y              | male   | GGE      | N          | No  |
| <i>NEDD4L</i>  | c.1682A>G | p.Asp561Gly  | CADD (33), SIFT (D), PolyPhen (D), M-CAP (D), REVEL (0.9)   | 0522 | 10y             | male   | IGE      | Borderline | Yes |
| <i>NEDD4L</i>  | c.1708A>T | p.Asn570Tyr  | CADD (32), SIFT (D), PolyPhen (D), M-CAP (D), REVEL (0.9)   | 0923 | 5y              | female | IGE      | N          | No  |
| <i>NF1</i>     | c.241C>A  | p.Leu81Ile   | CADD (23), SIFT (D), PolyPhen (B), M-CAP (D), REVEL (0.1)   | 0923 | 5y              | female | IGE      | N          | No  |
| <i>NF1</i>     | c.373C>T  | p.Arg125Cys  | CADD (24), SIFT (T), PolyPhen (P), M-CAP (D), REVEL (0.5)   | 0866 | 4y              | female | NAFE     | N          | No  |
| <i>NOTCH3</i>  | c.2981G>T | p.Gly994Val  | CADD (25), SIFT (D), PolyPhen (D), M-CAP (D), REVEL (0.8)   | 1118 | 7y              | female | NAFE     | N          | No  |
| <i>NOTCH3</i>  | c.739A>C  | p.Asn247His  | CADD (25.5), SIFT (D), PolyPhen (D), M-CAP (D), REVEL (0.9) | 0912 | 8m              | female | Combined | Borderline | No  |
| <i>NRXN1</i>   | c.1970G>T | p.Gly657Val  | CADD (25.9), SIFT (D), PolyPhen (D), M-CAP (D), REVEL (0.9) | 0730 | 5y              | male   | GGE      | N          | No  |
| <i>NRXN1</i>   | c.2293A>G | p.Met765Val  | CADD (25.1), SIFT (D), PolyPhen (P), M-CAP (D), REVEL (0.5) | 0869 | 6m              | male   | DEE      | Borderline | No  |
| <i>NRXN1</i>   | c.2558G>C | p.Arg853Pro  | CADD (27.6), SIFT (D), PolyPhen (D), M-CAP (D), REVEL (0.8) | 0763 | 6m              | male   | DEE      | Borderline | No  |
| <i>NSD1</i>    | c.1567G>T | p.Asp523Tyr  | CADD (22.7), SIFT (D), PolyPhen (B), M-CAP (D), REVEL (0.3) | 0600 | 2y              | female | Combined | N          | No  |
| <i>NSD1</i>    | c.3500G>T | p.Arg1167Leu | CADD (26.4), SIFT (D), PolyPhen (P), M-CAP (D), REVEL (0.4) | 0865 | 1y4m            | female | DEE      | Borderline | Yes |
| <i>OPA1</i>    | c.1933C>G | p.Arg645Gly  | CADD (26.3), SIFT (D), PolyPhen (D), M-CAP (D), REVEL (0.9) | 0650 | 3y              | female | GGE      | N          | No  |
| <i>PDCD10</i>  | c.148A>C  | p.Lys50Gln   | CADD (23.6), SIFT (T), PolyPhen (B), M-CAP (D), REVEL (0.1) | 0712 | 7y              | male   | NAFE     | N          | No  |
| <i>PHOX2B</i>  | c.137C>T  | p.Pro46Leu   | CADD (28.4), SIFT (D), PolyPhen (P), M-CAP (D), REVEL (0.8) | 1114 | 12y             | male   | DEE      | Severe     | Yes |
| <i>PPP3CA</i>  | c.1194C>A | p.Asn398Lys  | CADD (23.1), SIFT (D), PolyPhen (B), M-CAP (T), REVEL (0.1) | 0559 | 5y              | female | IGE      | N          | Yes |
| <i>PSEN1</i>   | c.752C>T  | p.Ala251Val  | CADD (24.6), SIFT (T), PolyPhen (D), M-CAP (D), REVEL (0.7) | 0885 | 16y             | female | GGE      | N          | No  |
| <i>PTCH1</i>   | c.3926A>G | p.Glu1309Gly | CADD (24.4), SIFT (D), PolyPhen (B), M-CAP (D), REVEL (0.5) | 0823 | 2y              | female | NAFE     | N          | No  |
| <i>PTCH1</i>   | c.655A>G  | p.Ile219Val  | CADD (21.3), SIFT (T), PolyPhen (B), M-CAP (D), REVEL (0.4) | 0813 | 2y              | female | Combined | N          | No  |
| <i>PUM1</i>    | c.731A>G  | p.Asp244Gly  | CADD (24.9), SIFT (T), PolyPhen (B), M-CAP (D), REVEL (0.2) | 1099 | 3y              | female | GGE      | Mild       | No  |
| <i>RAI1</i>    | c.5546T>G | p.Met1849Arg | CADD (27.4), SIFT (D), PolyPhen (P), M-CAP (D), REVEL (0.7) | 0856 | 2y              | female | GGE      | N          | No  |
| <i>REER</i>    | c.2161A>G | p.Asn721Asp  | CADD (26.5), SIFT (D), PolyPhen (D), M-CAP (D), REVEL (0.2) | 0633 | 6y              | male   | NAFE     | Mild       | No  |
| <i>REER</i>    | c.3092A>C | p.Gln1031Pro | CADD (23.9), SIFT (D), PolyPhen (P), M-CAP (D), REVEL (0.2) | 0665 | 8y              | female | IGE      | N          | No  |
| <i>RYR2</i>    | c.2603A>G | p.Asp868Gly  | CADD (31), SIFT (D), PolyPhen (D), M-CAP (D), REVEL (1)     | 0952 | infantile onset | female | DEE      | N          | No  |
| <i>RYR2</i>    | c.6742A>G | p.Met2248Val | CADD (23.9), SIFT (D), PolyPhen (B), M-CAP (D), REVEL (0.8) | 0930 | 7y              | male   | Combined | N          | No  |
| <i>RYR2</i>    | c.8768A>G | p.Tyr2923Cys | CADD (24.2), SIFT (D), PolyPhen (B), M-CAP (D), REVEL (0.7) | 1018 | 3m              | male   | DEE      | Severe     | Yes |
| <i>SCN1A</i>   | c.1850G>A | p.Arg617Lys  | CADD (23.9), SIFT (T), PolyPhen (P), M-CAP (D), REVEL (0.8) | 0527 | 5y              | female | GGE      | N          | No  |
| <i>SCN3A</i>   | c.5147C>T | p.Ala1716Val | CADD (23.7), SIFT (T), PolyPhen (P), M-CAP (D), REVEL (0.7) | 0462 | 12y             | male   | Combined | N          | No  |
| <i>SCN8A</i>   | c.4715A>C | p.Lys1572Thr | CADD (28.5), SIFT (D), PolyPhen (D), M-CAP (D), REVEL (0.9) | 0438 | 8m              | male   | DEE      | Moderate   | No  |
| <i>SETD1A</i>  | c.224C>T  | p.Ser75Phe   | CADD (24), SIFT (T), PolyPhen (D), M-CAP (T), REVEL (0.2)   | 1027 | 4y              | female | DEE      | Mild       | No  |
| <i>SETD1A</i>  | c.4594G>T | p.Val1532Leu | CADD (23.8), SIFT (T), PolyPhen (P), M-CAP (D), REVEL (0.5) | 0699 | 11y             | male   | NAFE     | Moderate   | Yes |
| <i>SLC6A1</i>  | c.650C>T  | p.Thr217Met  | CADD (25.5), SIFT (D), PolyPhen (D), M-CAP (D), REVEL (0.7) | 0629 | 3y              | female | Combined | N          | No  |
| <i>SMARCA2</i> | c.2915C>T | p.Ala972Val  | CADD (32), SIFT (D), PolyPhen (D), M-CAP (D), REVEL (0.7)   | 0862 | 1y6m            | male   | DEE      | Mild       | No  |
| <i>SMARCC2</i> | c.747T>A  | p.Asn249Lys  | CADD (23.3), SIFT (D), PolyPhen (D), M-CAP (D), REVEL (0.4) | 1010 | 1w              | female | NAFE     | N          | No  |
| <i>SMC3</i>    | c.556C>T  | p.Arg186Trp  | CADD (24.7), SIFT (T), PolyPhen (D), M-CAP (D), REVEL (0.6) | 0815 | 2y              | female | GGE      | N          | No  |
| <i>SON</i>     | c.2038G>A | p.Ala680Thr  | CADD (25.6), SIFT (D), PolyPhen (D), M-CAP (T), REVEL (0.2) | 0792 | 2y              | female | NAFE     | N          | No  |
| <i>SON</i>     | c.2188A>G | p.Thr730Ala  | CADD (22.8), SIFT (D), PolyPhen (P), M-CAP (T), REVEL (0.1) | 0433 | 6y              | female | IGE      | N          | No  |
| <i>SON</i>     | c.2878C>G | p.Pro960Ala  | CADD (23.7), SIFT (D), PolyPhen (D), M-CAP (T), REVEL (0.2) | 0499 | 2y6m            | female | Combined | Borderline | Yes |

|         |           |              |                                                             |      |      |        |          |            |     |
|---------|-----------|--------------|-------------------------------------------------------------|------|------|--------|----------|------------|-----|
| SON     | c.5968C>T | p.Arg1990Cys | CADD (24.8), SIFT (D), PolyPhen (D), M-CAP (D), REVEL (0.3) | 0431 | 9m   | male   | DEE      | Severe     | No  |
| SRCAP   | c.1361C>T | p.Ala454Val  | CADD (25.8), SIFT (D), PolyPhen (D), M-CAP (D), REVEL (0.6) | 0902 | 3y   | female | IGE      | Borderline | No  |
| SRCAP   | c.6056G>A | p.Arg2019His | CADD (22.9), SIFT (T), PolyPhen (B), M-CAP (T), REVEL (0.4) | 0902 | 3y   | female | IGE      | Borderline | No  |
| SRCAP   | c.8513G>T | p.Gly2838Val | CADD (20.9), SIFT (D), PolyPhen (B), M-CAP (D), REVEL (0.3) | 0548 | 7y6m | male   | Combined | Borderline | No  |
| SRCAP   | c.9368G>A | p.Arg3123His | CADD (27.7), SIFT (D), PolyPhen (D), M-CAP (D), REVEL (0.4) | 0527 | 5y   | female | GGE      | N          | No  |
| STX16   | c.53T>C   | p.Ile18Thr   | CADD (24.3), SIFT (D), PolyPhen (B), M-CAP (T), REVEL (0.2) | 0981 | 1y   | male   | DEE      | Mild       | Yes |
| SYNGAP1 | c.2435C>T | p.Pro812Leu  | CADD (23.4), SIFT (T), PolyPhen (P), M-CAP (T), REVEL (0.2) | 0568 | 16y  | male   | GGE      | N          | No  |
| TANC2   | c.2189G>T | p.Gly730Val  | CADD (25.8), SIFT (D), PolyPhen (P), M-CAP (D), REVEL (0.7) | 0454 | 16y  | male   | GGE      | Moderate   | Yes |
| TANC2   | c.3761T>A | p.Phe1254Tyr | CADD (27.7), SIFT (D), PolyPhen (P), M-CAP (D), REVEL (0.3) | 1098 | 2y   | male   | GGE      | Borderline | No  |
| TBX1    | c.391G>A  | p.Glu131Lys  | CADD (25.3), SIFT (T), PolyPhen (P), M-CAP (D), REVEL (0.6) | 0539 | 9y   | male   | NAFE     | N          | No  |
| TCF4    | c.1052C>T | p.Pro351Leu  | CADD (25.9), SIFT (T), PolyPhen (D), M-CAP (T), REVEL (0.3) | 0916 | 1y3m | male   | NAFE     | N          | No  |
| TGFBR2  | c.1546G>A | p.Val516Met  | CADD (31), SIFT (D), PolyPhen (D), M-CAP (D), REVEL (0.6)   | 0594 | 9y   | male   | NAFE     | N          | No  |
| TGFBR2  | c.1621A>T | p.Thr541Ser  | CADD (23.6), SIFT (T), PolyPhen (P), M-CAP (T), REVEL (0.3) | 0596 | 2y6m | male   | DEE      | Moderate   | Yes |
| TRAF7   | c.1829C>T | p.Thr610Met  | CADD (26.4), SIFT (D), PolyPhen (D), M-CAP (D), REVEL (0.3) | 0680 | 7m   | male   | NAFE     | Borderline | Yes |
| TRIO    | c.2632G>T | p.Val878Phe  | CADD (28), SIFT (D), PolyPhen (D), M-CAP (D), REVEL (0.4)   | 0010 | 5y   | male   | IGE      | Mild       | No  |
| TRIO    | c.7543C>G | p.Arg2515Gly | CADD (24.2), SIFT (D), PolyPhen (D), M-CAP (D), REVEL (0.1) | 0578 | 9y   | female | NAFE     | N          | No  |
| TRIO    | c.7853T>A | p.Ile2618Asn | CADD (25.9), SIFT (D), PolyPhen (P), M-CAP (T), REVEL (0.2) | 0559 | 5y   | female | IGE      | N          | Yes |
| TRIO    | c.8513C>T | p.Thr2838Ile | CADD (24.1), SIFT (T), PolyPhen (D), M-CAP (T), REVEL (0.3) | 0791 | 3y   | female | DEE      | Mild       | No  |
| TRRAP   | c.7478T>C | p.Met2493Thr | CADD (25.9), SIFT (D), PolyPhen (P), M-CAP (T), REVEL (0.4) | 1081 | 14y  | female | GGE      | N          | No  |
| TRRAP   | c.842T>C  | p.Ile281Thr  | CADD (24.3), SIFT (T), PolyPhen (P), M-CAP (T), REVEL (0.4) | 1105 | 2.5y | male   | NAFE     | Borderline | No  |
| TRRAP   | c.8644A>G | p.Ser2882Gly | CADD (22.7), SIFT (T), PolyPhen (B), M-CAP (T), REVEL (0.4) | 0509 | 5m   | male   | DEE      | Severe     | No  |
| TRRAP   | c.9196G>A | p.Val3066Ile | CADD (27.1), SIFT (D), PolyPhen (P), M-CAP (T), REVEL (0.3) | 0632 | 3y   | female | GGE      | N          | No  |
| TSC1    | c.2707G>C | p.Asp903His  | CADD (26.1), SIFT (D), PolyPhen (D), M-CAP (D), REVEL (0.5) | 0730 | 5y   | male   | GGE      | N          | No  |
| TSC2    | c.1694T>C | p.Leu565Pro  | CADD (25.6), SIFT (T), PolyPhen (D), M-CAP (D), REVEL (0.6) | 1092 | 4y   | male   | GGE      | N          | No  |
| UBE3A   | c.2411T>A | p.Leu804His  | CADD (25.9), SIFT (T), PolyPhen (D), M-CAP (D), REVEL (0.4) | 0710 | 8y   | female | GGE      | N          | No  |
| ZBTB18  | c.674G>A  | p.Cys225Tyr  | CADD (23.8), SIFT (D), PolyPhen (B), M-CAP (T), REVEL (0.1) | 0871 | 2y   | male   | Combined | N          | No  |
| ZEB2    | c.26G>A   | p.Gly9Asp    | CADD (26.3), SIFT (D), PolyPhen (D), M-CAP (D), REVEL (0.7) | 1067 | 11y  | male   | NAFE     | N          | No  |
| ZEB2    | c.272G>A  | p.Gly91Asp   | CADD (21.3), SIFT (T), PolyPhen (B), M-CAP (T), REVEL (0.2) | 0904 | 1y6m | female | GGE      | Moderate   | No  |

#### Cryptic splicing variants

| Gene   | DNA                    | Protein | Consequence/ <i>In silico</i> prediction | Cases | Seizure onset | Sex    | Epilepsy | ID         | ASD |
|--------|------------------------|---------|------------------------------------------|-------|---------------|--------|----------|------------|-----|
| ATP1A3 | c.1669+5G>T            |         | Splice donor loss at +5                  | 0775  | 8y            | female | GGE      | N          | No  |
| CHD8   | c.1969-9_1969-6delTTTT |         | Splice acceptor loss at -6               | 0454  | 16y           | male   | GGE      | Moderate   | Yes |
| COL4A1 | c.858+4A>T             |         | Splice donor loss at +4                  | 0631  | 5m            | female | DEE      | Moderate   | No  |
| CYFIP2 | c.2660+7G>T            |         | Splice donor gain at -2                  | 0661  | 4y            | female | NAFE     | Borderline | No  |
| KIF11  | c.2922+7T>G            |         | Splice donor gain at -1                  | 0875  | 4y            | female | NAFE     | N          | No  |
| KMT2D  | c.5643A>G              |         | Splice donor gain at -1                  | 0639  | 4m            | female | GGE      | N          | No  |
| SETD5  | c.567+3A>T             |         | Splice donor gain at +6                  | 0879  | 1w            | female | NAFE     | N          | No  |

|        |            |            |                            |      |      |        |      |          |     |
|--------|------------|------------|----------------------------|------|------|--------|------|----------|-----|
| SHANK3 | c.289-5T>A |            | Splice acceptor gain at +2 | 1071 | 3y6m | female | DEE  | Moderate | Yes |
| SNAP25 | c.407+5G>A |            | Splice donor loss at -5    | 0509 | 5m   | male   | DEE  | Severe   | No  |
| TBX1   | c.54C>G    | p.Asp18Glu | Splice acceptor loss at +8 | 0769 | 1y5m | male   | NAFE | Moderate | No  |

#### In-frame indels

| Gene    | DNA                     | Protein                     | Consequence/ <i>In silico</i> prediction | Cases | Seizure onset | Sex    | Epilepsy | ID       | ASD |
|---------|-------------------------|-----------------------------|------------------------------------------|-------|---------------|--------|----------|----------|-----|
| ARID1A  | c.375_380dupTGGCGG      | p.Gly126_Gly127dup          | Inframe deletion                         | 0810  | 2y            | male   | GGE      | N        | No  |
| CACNA1A |                         |                             | Inframe deletion                         | 0951  | 11y           | female | NAFE     | N        | No  |
| CHRNA2  | c.887_889delAGA         | p.Lys296del                 | Inframe deletion                         | 0699  | 11y           | male   | NAFE     | Moderate | Yes |
| DNMT1   |                         |                             | Inframe deletion                         | 0981  | 1y            | male   | DEE      | Mild     | Yes |
| EHMT1   |                         |                             | Inframe deletion                         | 1114  | 12y           | male   | DEE      | Severe   | Yes |
| EZH2    | c.1156_1161delAAAGAA    | p.Lys386_Glu387del          | Inframe deletion                         | 0580  | 2y            | male   | GGE      | N        | No  |
| FOXP1   | c.170_172dupACC         | p.His57dup                  | Inframe deletion                         | 0724  | 2y11m         | male   | GGE      | N        | No  |
| KANSL1  |                         |                             | Inframe deletion                         | 0933  | 8y            | female | NAFE     | N        | No  |
| SETD1B  |                         |                             | Inframe deletion                         | 1054  | 4y            | male   | IGE      | Mild     | No  |
| SMARCA2 |                         |                             | Inframe deletion                         | 0811  | 2y            | male   | Combined | Moderate | No  |
| SMARCA2 | c.685_686insCGCAGCAGC   | p.Gln228_Gln229insProGlnGln | Inframe deletion                         | 0609  | 5y            | female | IGE      | N        | No  |
| SKI     | c.249_251dupGCC         | p.Pro84dup                  | Inframe deletion                         | 0841  | 6y            | male   | NAFE     | N        | No  |
| TANC2   | c.4125_4133dupGCAGCAGCC | p.Gln1379_PRO1381dup        | Inframe deletion                         | 0462  | 12y           | male   | Combined | N        | No  |
| TBX1    | c.55_63delAGCAGCCTG     | p.Ser19_Leu21del            | Inframe deletion                         | 0519  | 5y            | female | IGE      | N        | No  |
| ZSWIM6  |                         |                             | Inframe deletion                         | 0691  | 2w            | male   | DEE      | Severe   | No  |

VUS, variant(s) of uncertain significance; ID, intellectual disability; ASD, autism spectrum disorder; DEE, developmental and epileptic encephalopathies; GGE, genetic generalized epilepsy; IGE, idiopathic generalized epilepsy; NAFE, non-acquired focal epilepsy; Y, yes; N, none; CADD, combined annotation dependent depletion; SIFT, sorting intolerant from tolerant; M-CAP, Mendelian clinically applicable pathogenicity; REVEL, rare exome variant ensemble learner; D, damaging; T, tolerable; B, benign; P, possibly damaging.

**eTable 4. Novel Candidate Epilepsy Genes and Their Associated Phenotypes**

| Epilepsy | Cases | Seizure onset | Sex    | ID         | ASD | Syndrome  | Gene            | Expressed in brain | Variant                             | Inheritance    | Zygoty | AF    | <i>In silico</i> prediction                               |
|----------|-------|---------------|--------|------------|-----|-----------|-----------------|--------------------|-------------------------------------|----------------|--------|-------|-----------------------------------------------------------|
| DEE      | 0763  | 6m            | male   | Borderline | N   | IESS      | <i>ANKRD27</i>  | Y                  | c.2942_2943del<br>p.Leu981GlnfsTer4 | both           | homo   | 0.000 | LoF                                                       |
|          | 0814  | 2y            | male   | Moderate   | Y   |           | <i>ANKRD34B</i> | Y                  | c.1454C>T<br>p.Pro485Leu            | <i>de novo</i> | hetero | N/A   | CADD (25), SIFT (D), PolyPhen (D), M-CAP (D), REVEL (0.5) |
|          | 0659  | 7m            | female | Mild       | Y   | IESS      | <i>CA5A</i>     | Y                  | c.287G>C<br>p.Trp96Ser              | both           | homo   | 0.000 | CADD (25), SIFT (T), PolyPhen (D), M-CAP (D), REVEL (0.4) |
|          | 0565  | 1w            | male   | Profound   | N   |           | <i>CELSR3</i>   | Y                  | c.4352C>T<br>p.Ala1451Val           | unknown        | homo   | 0.000 | CADD (22), SIFT (T), PolyPhen (B), M-CAP (D), REVEL (0.3) |
|          | 0662  | 3m            | female | Severe     | N   |           | <i>CLDN5</i>    | Y                  | c.360C>G<br>p.Phe120Leu             | <i>de novo</i> | hetero | N/A   | CADD (30), SIFT (D), PolyPhen (D), M-CAP (D), REVEL (0.8) |
|          | 0981  | 1y            | male   | Mild       | Y   |           | <i>CTXN1</i>    | Y                  | c.247T>A<br>p.Ter83ArgextTer109     | <i>de novo</i> | hetero | N/A   | -                                                         |
|          | 0825  | 1y10m         | male   | Borderline | N   | IESS      | <i>FZD5</i>     | Y                  | c.1024C>A<br>p.Leu342Met            | <i>de novo</i> | hetero | N/A   | CADD (21), SIFT (D), PolyPhen (D), M-CAP (D), REVEL (0.6) |
|          | 0747  | 4m            | female | Profound   | N   | IESS      | <i>GNAZ</i>     | Y                  | c.49C>T<br>p.Arg17Trp               | <i>de novo</i> | hetero | 0.000 | CADD (24), SIFT (D), PolyPhen (B), M-CAP (D), REVEL (0.6) |
|          | 0747  | 4m            | female | Profound   | N   | IESS      | <i>GRID2IP</i>  | Y                  | c.1269-2A>G                         | <i>de novo</i> | hetero | N/A   | LoF                                                       |
|          | 0686  | 4m            | male   | Severe     | Y   | IESS      | <i>HTR3A</i>    | Y                  | c.347T>A<br>p.Ile116Asn             | paternal       | hetero | 0.000 | CADD (28), SIFT (D), PolyPhen (D), M-CAP (D), REVEL (0.8) |
|          |       |               |        |            |     |           | <i>HTR3A</i>    | Y                  | c.932T>C<br>p.Ile311Thr             | unknown        | hetero | 0.000 | CADD (25), SIFT (D), PolyPhen (D), M-CAP (D), REVEL (0.9) |
|          | 0435  | 7y            | female | Borderline | Y   | LGS       | <i>LYL1</i>     | Y                  | c.529_558del<br>p.Leu177_Leu186del  | <i>de novo</i> | hetero | N/A   | Conserved region                                          |
|          | 1050  | 6m            | male   | Severe     | N   |           | <i>MICALL2</i>  | Y                  | c.599G>A<br>p.Arg200Gln             | both           | homo   | 0.000 | CADD (28), SIFT (D), PolyPhen (D), M-CAP (D), REVEL (0.7) |
|          | 0723  | 5y            | male   | Moderate   | Y   |           | <i>MORC4</i>    | Y                  | c.307A>C<br>p.Ser103Arg             | unknown        | hemi   | N/A   | CADD (32), SIFT (D), PolyPhen (D), M-CAP (D), REVEL (0.9) |
|          | 0429  | 7m            | male   | Moderate   | Y   | IESS, LGS | <i>NCOR1</i>    | Y                  | c.1765G>A<br>p.Gly589Arg            | <i>de novo</i> | hetero | N/A   | CADD (32), SIFT (D), PolyPhen (D), M-CAP (D), REVEL (0.4) |
|          | 0770  | 4m            | female | Moderate   | N   | IESS      | <i>NLRX1</i>    | Y                  | c.1066C>T<br>p.Arg356Trp            | both           | homo   | 0.000 | CADD (26), SIFT (D), PolyPhen (P), M-CAP (D), REVEL (0.4) |
|          | 0898  | 3m            | female | Moderate   | N   | IESS, LGS | <i>PPARD</i>    | Y                  | c.424G>T<br>p.Ala142Ser             | <i>de novo</i> | hetero | N/A   | CADD (34), SIFT (D), PolyPhen (B), M-CAP (D), REVEL (0.7) |
|          | 0542  | 4y            | female | Borderline | N   | EE-SWAS   | <i>ROBO1</i>    | Y                  | c.595delG<br>p.Glu199SerfsTer20     | <i>de novo</i> | hetero | N/A   | LoF                                                       |
|          | 0561  | 7y            | male   | Moderate   | Y   | LGS       | <i>TCF12</i>    | Y                  | c.82del<br>p.Ser28ProfsTer59        | <i>de novo</i> | hetero | N/A   | LoF                                                       |

|     |      |       |        |          |   |           |                |   |                                      |                   |        |       |                                                           |
|-----|------|-------|--------|----------|---|-----------|----------------|---|--------------------------------------|-------------------|--------|-------|-----------------------------------------------------------|
|     | 0896 | 2y    | female | Mild     | N | LGS       | <i>TMEM57</i>  | Y | c.988A>C<br>p.Asn330His              | <i>de novo</i>    | hetero | N/A   | CADD (24), SIFT (T), PolyPhen (P), M-CAP (T), REVEL (0.2) |
|     | 0747 | 4m    | female | Profound | N | IESS      | <i>TRPC7</i>   | Y | c.1229T>G<br>p.Phe410Cys             | <i>de novo</i>    | hetero | N/A   | CADD (27), SIFT (D), PolyPhen (D), M-CAP (D), REVEL (0.7) |
|     | 1089 | 1y6m  | male   | Moderate | Y |           | <i>TRPM7</i>   | Y | c.3137G>A<br>p.Gly1046Asp            | <i>de novo</i>    | hetero | N/A   | CADD (26), SIFT (D), PolyPhen (D), M-CAP (D), REVEL (1)   |
|     | 0794 | 4m    | female | Severe   | N | IESS, LGS | <i>TWIST1</i>  | Y | c.68A>G<br>p.Glu23Gly                | <i>de novo</i>    | hetero | N/A   | CADD (24), SIFT (D), PolyPhen (B), M-CAP (D), REVEL (0.4) |
|     | 0691 | 2w    | male   | Severe   | N | IESS      | <i>ZNF729</i>  | Y | c.2957A>T<br>p.His986Leu             | unknown           | homo   | N/A   | CADD (21), SIFT (D), PolyPhen (D), M-CAP (T), REVEL (0.3) |
|     | 0911 | 8y    | male   | Mild     | N | FIRES     | <i>ZNF879</i>  | Y | c.59C>T<br>p.Ala20Val                | <i>de novo</i>    | hetero | N/A   | CADD (22), SIFT (T), PolyPhen (B), M-CAP (T), REVEL (0.2) |
| GGE | 0812 | 2y    | male   | N/A      | N |           | <i>ACAD9</i>   | Y | c.359del<br>p.Phe120SerfsTer9        | maternal          | hetero | 0.000 | LoF                                                       |
|     |      |       |        |          |   |           |                |   | c.1684G>A<br>p.Asp562Asn             | paternal          | hetero | 0.000 | CADD (24), SIFT (T), PolyPhen (D), M-CAP (D), REVEL (0.4) |
|     | 0568 | 16y   | male   | N/A      | N |           | <i>AGBL2</i>   | Y | c.725C>A<br>p.Ser242Tyr              | <i>de novo</i>    | hetero | N/A   | CADD (28), SIFT (D), PolyPhen (D), M-CAP (D), REVEL (0.4) |
|     | 0568 | 16y   | male   | N/A      | N |           | <i>ATXN2</i>   | Y | c.950C>G<br>p.Ser317Trp              | <i>de novo</i>    | hetero | N/A   | CADD (25), SIFT (D), PolyPhen (P), M-CAP (D), REVEL (0.2) |
|     | 0472 | 1y2m  | female | N/A      | N | MEI       | <i>BRINP1</i>  | Y | c.1565_1570del<br>p.Lys522_Arg523del | <i>de novo</i>    | hetero | N/A   | Conserved region                                          |
|     | 0891 | 9y    | male   | N/A      | Y |           | <i>BIRC6</i>   | Y | c.14086C>A<br>p.Gln4696Lys           | <i>de novo</i>    | hetero | N/A   | -                                                         |
|     | 0521 | 5y2m  | male   | N/A      | N |           | <i>CAMSAP3</i> | Y | c.3507del<br>p.Lys1170ArgfsTer17     | <i>de novo</i>    | hetero | N/A   | LoF                                                       |
|     | 0968 | 5m    | male   | Mild     | N |           | <i>CDH2</i>    | Y | c.1161T>G<br>p.Phe387Leu             | <i>de novo</i>    | hetero | N/A   | CADD (25), SIFT (D), PolyPhen (B), M-CAP (D), REVEL (0.5) |
|     | 0748 | 12y   | male   | Moderate | Y |           | <i>DDX47</i>   | Y | c.334_342dup<br>p.Phe112_Ala114dup   | <i>de novo</i>    | hetero | N/A   | Conserved region                                          |
|     | 0819 | 6y    | female | N/A      | N |           | <i>FBXL18</i>  | Y | c.1946dup<br>p.Thr650HisfsTer89      | <i>de novo</i>    | hetero | N/A   | LoF                                                       |
|     | 0724 | 2y11m | male   | N/A      | N |           | <i>FBXO44</i>  | Y | c.146del<br>p.Arg49ProfsTer50        | paternal (mosaic) | hetero | N/A   | LoF                                                       |
|     | 0962 | 12y   | male   | N/A      | N |           | <i>GLI3</i>    | Y | c.4595C>T<br>p.Ser1532Phe            | <i>de novo</i>    | hetero | N/A   | CADD (29), SIFT (D), PolyPhen (D), M-CAP (D), REVEL (0.5) |
|     | 1092 | 4y    | male   | N/A      | N | FIRES     | <i>GLRA4</i>   | Y | c.384G>C<br>p.Trp128Cys              | maternal          | hemi   | N/A   | -                                                         |
|     | 0876 | 2y6m  | male   | N/A      | N |           | <i>HDAC3</i>   | Y | c.601C>T<br>p.Pro201Ser              | <i>de novo</i>    | hetero | N/A   | -                                                         |
|     | 1003 | 4y    | male   | Mild     | N |           | <i>KHSRP</i>   | Y | c.1138G>A<br>p.Glu380Lys             | <i>de novo</i>    | hetero | N/A   | CADD (25), SIFT (D), PolyPhen (B), M-CAP (D), REVEL (0.1) |
|     | 0560 | 3y    | female | N/A      | N | EEM       | <i>LMTK3</i>   | Y | c.655C>T<br>p.His219Tyr              | <i>de novo</i>    | hetero | N/A   | CADD (26), SIFT (D), PolyPhen (D), M-CAP (D), REVEL (0.8) |

|      |      |      |        |            |   |         |                  |   |                                   |                |        |       |                                                           |
|------|------|------|--------|------------|---|---------|------------------|---|-----------------------------------|----------------|--------|-------|-----------------------------------------------------------|
|      | 0626 | 1y6m | female | N/A        | N |         | <i>MAOB</i>      | Y | c.206T>G<br>p.Leu69Trp            | <i>de novo</i> | hetero | N/A   | CADD (26), SIFT (D), PolyPhen (D), M-CAP (D), REVEL (0.9) |
|      | 0748 | 12y  | male   | Moderate   | Y |         | <i>NXT1</i>      | Y | c.376_377del<br>p.Trp126GlufsTer5 | <i>de novo</i> | hetero | N/A   | LoF                                                       |
|      | 0762 | 1y   | female | N/A        | N | EEM     | <i>PAM</i>       | Y | c.1790A>G<br>p.Tyr597Cys          | <i>de novo</i> | hetero | N/A   | CADD (27), SIFT (D), PolyPhen (D), M-CAP (D), REVEL (0.7) |
|      | 1093 | 15y  | male   | N/A        | N |         | <i>PLXNB3</i>    | Y | c.4592G>C<br>p.Arg1531Pro         | maternal       | hemi   | N/A   | CADD (29), SIFT (D), PolyPhen (D), M-CAP (D), REVEL (0.6) |
|      | 0454 | 16y  | male   | Moderate   | Y |         | <i>PRPS1</i>     | Y | c.590A>C<br>p.Lys197Thr           | maternal       | hemi   | N/A   | CADD (25), SIFT (T), PolyPhen (P), M-CAP (D), REVEL (0.8) |
|      | 0493 | 4y   | female | Borderline | N |         | <i>SEMA4B</i>    | Y | c.499A>G<br>p.Thr167Ala           | <i>de novo</i> | hetero | N/A   | CADD (24), SIFT (T), PolyPhen (B), M-CAP (T), REVEL (0.1) |
|      | 0867 | 11y  | female | N/A        | N |         | <i>SLC12A4</i>   | Y | c.2026C>T<br>p.Arg676Cys          | both           | homo   | 0.000 | CADD (26), SIFT (D), PolyPhen (D), M-CAP (D), REVEL (0.9) |
|      | 1074 | 6y   | male   | N/A        | N |         | <i>TCEAL3</i>    | Y | c.536G>A<br>p.Arg179Gln           | maternal       | hemi   | N/A   | CADD (24), SIFT (D), PolyPhen (P), M-CAP (T), REVEL (0.1) |
|      | 1001 | 6y   | male   | N/A        | N |         | <i>USP51</i>     | Y | c.1472G>A<br>p.Gly491Asp          | maternal       | hemi   | N/A   | CADD (23), SIFT (T), PolyPhen (D), M-CAP (T), REVEL (0.2) |
|      | 0706 | 2y   | male   | Borderline | N |         | <i>ZDHHC15</i>   | Y | c.450-6T>G                        | maternal       | hemi   | N/A   | Acceptor loss at -6                                       |
|      | 0812 | 2y   | male   | N/A        | N |         | <i>ZNF488</i>    | Y | c.945G>T<br>p.Glu315Asp           | <i>de novo</i> | hetero | N/A   | -                                                         |
| IGE  | 0722 | 13y  | female | N/A        | N | JME     | <i>ARIH2</i>     | Y | c.475C>T<br>p.Gln159Ter           | <i>de novo</i> | hetero | N/A   | LoF                                                       |
|      | 0989 | 5y   | female | N/A        | N | CAE     | <i>INO80</i>     | Y | c.679A>G<br>p.Lys227Glu           | <i>de novo</i> | hetero | 0.000 | CADD (23), SIFT (T), PolyPhen (B), M-CAP (D), REVEL (0.4) |
|      | 0579 | 6y   | female | N/A        | N | CAE     | <i>KIAA1211</i>  | Y | c.2576A>G<br>p.Asn859Ser          | <i>de novo</i> | hetero | N/A   | CADD (23), SIFT (D), PolyPhen (B), M-CAP (T), REVEL (0.1) |
|      | 0549 | 7y   | female | N/A        | N | JME     | <i>KIAA1324L</i> | Y | c.1372G>A<br>p.Gly458Arg          | <i>de novo</i> | mosaic | N/A   | CADD (24), SIFT (T), PolyPhen (P), M-CAP (D), REVEL (0.3) |
|      | 0010 | 5y   | male   | Mild       | N |         | <i>SLITRK2</i>   | Y | c.1276C>T<br>p.Arg426Cys          | maternal       | hemi   | N/A   | CADD (26), SIFT (D), PolyPhen (D), M-CAP (D), REVEL (0.4) |
|      | 0902 | 3y   | female | Borderline | N | CAE     | <i>THAP11</i>    | Y | c.790C>T<br>p.Gln264Ter           | <i>de novo</i> | hetero | N/A   | LoF                                                       |
|      | 0919 | 10y  | female | N/A        | N | JME     | <i>TNIP1</i>     | Y | c.698G>T<br>p.Arg233Leu           | <i>de novo</i> | hetero | N/A   | CADD (27), SIFT (D), PolyPhen (D), M-CAP (D), REVEL (0.2) |
| NAFE | 0532 | 15y  | male   | Mild       | N |         | <i>ACOT1</i>     | Y | c.570del<br>p.Tyr191IlefsTer22    | unknown        | homo   | N/A   | LoF                                                       |
|      | 1105 | 2.5y | male   | Borderline | N |         | <i>ATP6V1B2</i>  | Y | c.361A>T<br>p.Thr121Ser           | <i>de novo</i> | hetero | N/A   | CADD (23), SIFT (T), PolyPhen (B), M-CAP (D), REVEL (0.5) |
|      | 0712 | 7y   | male   | N/A        | N |         | <i>BNC2</i>      | Y | c.1616T>G<br>p.Met539Arg          | <i>de novo</i> | hetero | N/A   | CADD (22), SIFT (T), PolyPhen (B), M-CAP (T), REVEL (0.2) |
|      | 0502 | 6y   | male   | N/A        | Y | SeLECTS | <i>C12orf45</i>  | Y | c.527dupT<br>p.Leu176PhefsTer7    | <i>de novo</i> | hetero | N/A   | LoF                                                       |



|      |      |        |            |   |         |                |   |                                 |                |        |     |                                                           |
|------|------|--------|------------|---|---------|----------------|---|---------------------------------|----------------|--------|-----|-----------------------------------------------------------|
| 1102 | 14y  | male   | N/A        | N |         | <i>CACNA1F</i> | Y | c.4715C>A<br>p.Pro1572Gln       | maternal       | hemi   | N/A | CADD (26), SIFT (D), PolyPhen (D), M-CAP (D), REVEL (0.8) |
| 0928 | 5y   | male   | N/A        | N | SHE     | <i>CAMKK1</i>  | Y | c.515G>A<br>p.Arg172His         | <i>de novo</i> | hetero | N/A | CADD (33), SIFT (D), PolyPhen (D), M-CAP (D), REVEL (0.5) |
| 0852 | 2y   | female | N/A        | N |         | <i>CHRM2</i>   | Y | c.101G>A<br>p.Ser34Asn          | <i>de novo</i> | hetero | N/A | CADD (26), SIFT (D), PolyPhen (D), M-CAP (T), REVEL (0.3) |
| 0879 | 1w   | female | N/A        | N |         | <i>CPSF1</i>   | Y | c.4102A>C<br>p.Thr1368Pro       | <i>de novo</i> | hetero | N/A | CADD (24), SIFT (D), PolyPhen (B), M-CAP (D), REVEL (0.2) |
| 0703 | 4y   | female | N/A        | N | SeLFE   | <i>CSMD1</i>   | Y | c.8009G>T<br>p.Gly2670Val       | <i>de novo</i> | hetero | N/A | CADD (24), SIFT (D), PolyPhen (D), M-CAP (T), REVEL (0.5) |
| 0978 | 10y  | male   | N/A        | N | SeLECTS | <i>CUL3</i>    | Y | c.535C>T<br>p.Arg179Trp         | <i>de novo</i> | hetero | N/A | CADD (27), SIFT (D), PolyPhen (D), M-CAP (D), REVEL (0.9) |
| 0929 | 7y   | male   | N/A        | N | SeLECTS | <i>DPYSL2</i>  | Y | c.1144G>A<br>p.Glu382Lys        | <i>de novo</i> | hetero | N/A | CADD (32), SIFT (D), PolyPhen (D), M-CAP (D), REVEL (0.9) |
| 0418 | 3y   | male   | Borderline | N |         | <i>GNL3L</i>   | Y | c.965G>A<br>p.Cys322Tyr         | maternal       | hemi   | N/A | CADD (25), SIFT (D), PolyPhen (D), M-CAP (D), REVEL (0.6) |
| 0868 | 5y   | female | Mild       | N |         | <i>ITM2C</i>   | Y | c.802T>C<br>p.Ter268ArgextTer37 | <i>de novo</i> | hetero | N/A | -                                                         |
| 0525 | 5y   | male   | N/A        | N | SHE     | <i>KLHL13</i>  | Y | c.1321G>A<br>p.Ala441Thr        | maternal       | hemi   | N/A | CADD (26), SIFT (D), PolyPhen (D), M-CAP (D), REVEL (0.6) |
| 0928 | 5y   | male   | N/A        | N | SHE     | <i>MAP3K15</i> | Y | c.1843A>T<br>p.Arg615Ter        | maternal       | hemi   | N/A | LoF                                                       |
| 0607 | 7y   | female | N/A        | N | RS      | <i>MEST</i>    | Y | c.437A>C<br>p.His146Pro         | <i>de novo</i> | hetero | N/A | CADD (27), SIFT (D), PolyPhen (D), M-CAP (D), REVEL (0.9) |
| 0495 | 1y1m | male   | Borderline | N |         | <i>MXRA5</i>   | Y | c.6578G>A<br>p.Ser2193Asn       | maternal       | hemi   | N/A | CADD (28), SIFT (D), PolyPhen (D), M-CAP (D), REVEL (0.4) |
| 0423 | 1y   | male   | Borderline | N | SHE     | <i>NOTCH2</i>  | Y | c.2502G>C<br>p.Leu834Phe        | <i>de novo</i> | hetero | N/A | CADD (24), SIFT (D), PolyPhen (D), M-CAP (D), REVEL (0.5) |
| 0676 | 1y   | male   | N/A        | N |         | <i>OTUD6A</i>  | Y | c.52G>C<br>p.Glu18Gln           | maternal       | hemi   | N/A | CADD (23), SIFT (D), PolyPhen (D), M-CAP (D), REVEL (0.3) |
| 0570 | 2y   | male   | Moderate   | N |         | <i>PPFIA3</i>  | Y | c.115C>T<br>p.Arg39Cys          | <i>de novo</i> | hetero | N/A | CADD (32), SIFT (D), PolyPhen (D), M-CAP (D), REVEL (0.3) |
| 0617 | 2y   | male   | N/A        | N |         | <i>PRPF31</i>  | Y | c.1106C>T<br>p.Thr369Met        | <i>de novo</i> | mosaic | N/A | CADD (28), SIFT (D), PolyPhen (D), M-CAP (D), REVEL (0.8) |
| 0918 | 5y   | male   | N/A        | N |         | <i>RPS4X</i>   | Y | c.703T>C<br>p.Trp235Arg         | maternal       | hemi   | N/A | CADD (24), SIFT (T), PolyPhen (B), M-CAP (D), REVEL (0.4) |
| 0780 | 14y  | male   | N/A        | N |         | <i>SCUBE1</i>  | Y | c.1064A>G<br>p.Asp355Gly        | <i>de novo</i> | hetero | N/A | CADD (27), SIFT (D), PolyPhen (P), M-CAP (D), REVEL (1)   |
| 0539 | 9y   | male   | N/A        | N |         | <i>SIPA1L1</i> | Y | c.4754C>T<br>p.Ser1585Leu       | <i>de novo</i> | hetero | N/A | CADD (28), SIFT (D), PolyPhen (D), M-CAP (D), REVEL (0.5) |
| 0540 | 8y   | female | N/A        | N |         | <i>STK3</i>    | Y | c.976A>G<br>p.Lys326Glu         | <i>de novo</i> | hetero | N/A | CADD (23), SIFT (T), PolyPhen (B), M-CAP (D), REVEL (0.4) |
| 0502 | 6y   | male   | N/A        | Y | SeLECTS | <i>SYTL5</i>   | Y | c.278G>C<br>p.Arg93Pro          | maternal       | hemi   | N/A | CADD (24), SIFT (D), PolyPhen (D), M-CAP (D), REVEL (0.6) |

|          |      |      |        |            |   |         |                 |   |                                     |                |        |       |                                                           |
|----------|------|------|--------|------------|---|---------|-----------------|---|-------------------------------------|----------------|--------|-------|-----------------------------------------------------------|
|          | 0745 | 7m   | female | N/A        | N |         | <i>TMEM151A</i> | Y | c.1173dup<br>p.Ala392ArgfsTer53     | both           | homo   | 0.000 | LoF                                                       |
|          | 1105 | 2.5y | male   | Borderline | N |         | <i>TNRC6A</i>   | Y | c.5015C>T<br>p.Ala1672Val           | <i>de novo</i> | hetero | N/A   | CADD (28), SIFT (D), PolyPhen (D), M-CAP (D), REVEL (0.3) |
|          | 0933 | 8y   | female | N/A        | N |         | <i>YBX3</i>     | Y | c.311A>G<br>p.Tyr104Cys             | <i>de novo</i> | hetero | N/A   | CADD (31), SIFT (D), PolyPhen (D), M-CAP (T), REVEL (0.5) |
|          | 0929 | 7y   | male   | N/A        | N | SeLECTS | <i>ZBTB38</i>   | Y | c.1121G>A<br>p.Cys374Tyr            | <i>de novo</i> | hetero | N/A   | CADD (28), SIFT (D), PolyPhen (D), M-CAP (D), REVEL (0.9) |
| Combined | 0845 | 12y  | female | N/A        | N |         | <i>ALKBH1</i>   | Y | c.869C>T<br>p.Pro290Leu             | <i>de novo</i> | hetero | N/A   | CADD (30), SIFT (D), PolyPhen (D), M-CAP (D), REVEL (0.5) |
|          | 0871 | 2y   | male   | N/A        | N | SWAS    | <i>ANLN</i>     | Y | c.1285C>T<br>p.Gln429Ter            | <i>de novo</i> | hetero | N/A   | LoF                                                       |
|          | 0831 | 6y   | male   | N/A        | N |         | <i>DNAJC4</i>   | Y | c.691del<br>p.Gln231ArgfsTer73      | <i>de novo</i> | hetero | N/A   | LoF                                                       |
|          | 0779 | 1y1m | male   | N/A        | N | GEFS+   | <i>FAF1</i>     | Y | c.3G>A<br>p.Met1?                   | <i>de novo</i> | hetero | N/A   | LoF                                                       |
|          | 0587 | 8y   | female | N/A        | N | LGS     | <i>FIZ1</i>     | Y | c.1403G>T<br>p.Arg468Leu            | <i>de novo</i> | hetero | N/A   | CADD (25), SIFT (D), PolyPhen (D), M-CAP (D), REVEL (0.2) |
|          |      |      |        |            |   |         | <i>FIZ1</i>     | Y | c.997T>G<br>p.Cys333Gly             | <i>de novo</i> | hetero | N/A   | CADD (24), SIFT (D), PolyPhen (D), M-CAP (D), REVEL (0.4) |
|          | 0931 | 1y6m | female | Borderline | N |         | <i>HELB</i>     | Y | c.662T>C<br>p.Leu221Pro             | <i>de novo</i> | hetero | N/A   | CADD (27), SIFT (D), PolyPhen (D), M-CAP (D), REVEL (0.4) |
|          | 0753 | 2y   | female | N/A        | N | LKS     | <i>MCTP1</i>    | Y | c.1688A>C<br>p.Gln563Pro            | <i>de novo</i> | hetero | N/A   | CADD (25), SIFT (D), PolyPhen (B), M-CAP (D), REVEL (0.1) |
|          | 0789 | 1y   | female | Borderline | N |         | <i>NEURL4</i>   | Y | c.2262G>C<br>p.Arg754=              | <i>de novo</i> | hetero | N/A   | Acceptor loss at 0                                        |
|          | 0644 | 11m  | male   | N/A        | N |         | <i>PDE4C</i>    | Y | c.1329_1330+2delCAGT                | <i>de novo</i> | hetero | N/A   | LoF                                                       |
|          | 1044 | 11y  | male   | Moderate   | Y |         | <i>PLXNB3</i>   | Y | c.5008C>A<br>p.Leu1670Met           | maternal       | hemi   | N/A   | CADD (22), SIFT (D), PolyPhen (D), M-CAP (D), REVEL (0.2) |
|          | 0519 | 5y   | female | N/A        | N |         | <i>RYK</i>      | Y | c.6_7insA<br>p.Gly3ArgfsTer78       | <i>de novo</i> | hetero | N/A   | LoF                                                       |
|          | 0499 | 2y6m | female | Borderline | Y |         | <i>SLC2A8</i>   | Y | c.802C>T<br>p.Gln268Ter             | both           | homo   | 0.001 | LoF                                                       |
|          | 0813 | 2y   | female | N/A        | N |         | <i>SNRNP200</i> | Y | c.3388C>T<br>p.Arg1130Cys           | <i>de novo</i> | hetero | 0.000 | CADD (32), SIFT (D), PolyPhen (D), M-CAP (D), REVEL (0.7) |
|          | 0811 | 2y   | male   | Moderate   | N |         | <i>TUBA8</i>    | Y | c.4C>T<br>p.Arg2Trp                 | both           | homo   | N/A   | CADD (26), SIFT (D), PolyPhen (D), M-CAP (D), REVEL (0.7) |
|          | 0983 | 6y   | female | Borderline | N |         | <i>XKR6</i>     | Y | c.1577_1587del<br>p.Val526GlyfsTer3 | <i>de novo</i> | hetero | N/A   | LoF                                                       |

ID, intellectual disability; ASD, autism spectrum disorder; AF, allele frequency; DEE, developmental and epileptic encephalopathies; GGE, genetic generalized epilepsy; IGE, idiopathic generalized epilepsy; NAFE, non-acquired focal epilepsy; N/A, not applicable; Y, yes; N, none; IESS, infantile epileptic spasm syndrome; LGS, Lennox-Gastaut syndrome; EE-SWAS, epileptic encephalopathy with spike-and-wave activation in sleep; FIRES, febrile infection-related epilepsy syndrome; MEI, myoclonic epilepsy of infancy; EEM, epilepsy with eyelid myoclonia; JME, juvenile myoclonic epilepsy; CAE, childhood absence epilepsy; SeLECTS, self-limited epilepsy with centrotemporal spikes; SHE, sleep-related hypermotor (hyperkinetic) epilepsy; SeLFE, self-limited focal epilepsy; RS, Rasmussen syndrome; SWAS, spike- and-wave activation in sleep; GEFS+, generalized epilepsy with febrile seizure plus; LKS, Landau-Kleffner syndrome; CADD, combined annotation dependent depletion; SIFT, sorting intolerant from tolerant; M-CAP, Mendelian clinically applicable pathogenicity; REVEL, rare exome variant ensemble learner; D, damaging; T, tolerable; B, benign; P, possibly damaging; LoF, loss of function.

**eTable 5. Clinical and Diagnostic Genetic Findings in 11 Cases With CNVs**

| Coordination (hg19)      | Outcomes and involved genes        | Zygosity | AF           | Cases | Seizure onset | Sex    | Seizure type(s)                                          | ID         | ASD | ASM response |
|--------------------------|------------------------------------|----------|--------------|-------|---------------|--------|----------------------------------------------------------|------------|-----|--------------|
| chr2:166847505-167334456 | <i>SCN1A</i>                       | hetero   | N/A          | 0625  | 1y            | male   | Generalized tonic, GTCS                                  | Borderline | N   | Refractory   |
| chr3:11058648-11060634   | <i>SLC6A1</i>                      | hetero   | N/A          | 0507  | 1y10m         | female | Generalized absence, typical                             | N/A        | N   | Refractory   |
| chr16:138446-140150      | <i>NPRL3</i>                       | hetero   | N/A          | 0696  | 4m            | male   | Infantile spasm (4m), focal                              | Borderline | N   | Refractory   |
| chr22:32121274-32302733  | <i>DEPDC5</i>                      | hetero   | N/A          | 0739  | 6y            | male   | Focal, tonic                                             | Borderline | Y   | Refractory   |
| chr22:32193336-32194893  | <i>DEPDC5</i>                      | hetero   | N/A          | 0760  | 3y            | male   | Focal motor to bilateral tonic-clonic                    | N/A        | N   | Controlled   |
| chr1:146630894-147415874 | 1q21.1 recurrent microdeletion     | hetero   | 5x in gnomAD | 0816  | 5y            | female | Generalized absence, typical; GTCS                       | N/A        | N   | Controlled   |
| chr15:30896079-32404350  | 15q13.3 recurrent microdeletion    | hetero   | 1x in gnomAD | 0547  | 6y            | female | GTCS, generalized absence, typical with eyelid myoclonia | Mild       | N   | Controlled   |
| chr16:29674800-30199626  | 16p11.2 recurrent microduplication | hetero   | 1x in gnomAD | 0848  | 8m            | male   | Focal motor to bilateral tonic-clonic                    | N/A        | Y   | Controlled   |
| chr16:21964495-22385880  | 16p12.1 recurrent microdeletion    | hetero   | 5x in gnomAD | 0419  | 4y            | male   | GTC, absence                                             | Mild       | Y   | Controlled   |
| chr16:14960162-16297720  | 16p13.11 recurrent microdeletion   | hetero   | 3x in gnomAD | 0936  | 14y           | male   | Focal to bilateral tonic-clonic                          | Moderate   | N   | Refractory   |
| chr22:18893638-21386351  | 22q11 deletion (DiGeorge) syndrome | hetero   | N/A          | 0947  | 6y            | female | GTCS                                                     | Borderline | N   | Controlled   |

CNV, copy number variant; AF, allele frequency; N/A, not available; ID, intellectual disability; ASD, autism spectrum disorder; ASM, anti-seizure medication; N/A, not applicable; GTCS, generalized tonic-clonic seizure; GTC, generalized tonic seizure; Y, yes; N, none.

**eTable 6. Bivariate and Multivariate Regression Model of Phenotypic Variables to Diagnostic Yield by ES**

|                                         | model 1 (bivariate) |                               |                           | model 2 (multivariate) |                |                           |
|-----------------------------------------|---------------------|-------------------------------|---------------------------|------------------------|----------------|---------------------------|
|                                         | Coefficient         | <i>P</i> value                | OR (95% CI)               | Coefficient            | <i>P</i> value | adjusted OR (95% CI)      |
| Sex                                     | 0.02                | 0.92                          | 1.02 (0.66 – 1.58)        | -0.16                  | 0.49           | 0.85 (0.53 – 1.36)        |
| Age of seizure onset                    | -0.13               | <b>0.15 × 10<sup>-3</sup></b> | <b>0.88 (0.82 – 0.94)</b> | -0.08                  | <b>0.03</b>    | <b>0.93 (0.87 – 0.99)</b> |
| DEE or ID                               | 1.31                | <b>0.27 × 10<sup>-6</sup></b> | <b>3.69 (2.24 – 6.06)</b> | 0.89                   | <b>0.00</b>    | <b>2.44 (1.40 – 4.26)</b> |
| ASD                                     | 0.53                | 0.06                          | 1.70 (0.98 – 2.97)        | 0.10                   | 0.76           | 1.10 (0.60 – 2.02)        |
| ADHD                                    | 0.04                | 0.89                          | 1.04 (0.57 – 1.93)        | 0.02                   | 0.95           | 1.02 (0.54 – 1.95)        |
| Motor impairment                        | 1.19                | <b>0.20 × 10<sup>-6</sup></b> | <b>3.29 (2.10 – 5.15)</b> | 0.79                   | <b>0.00</b>    | <b>2.19 (1.34 – 3.58)</b> |
| History of afebrile seizure in a parent | -0.27               | 0.58                          | 0.76 (0.29 – 2.03)        | -0.22                  | 0.68           | 0.80 (0.29 – 2.26)        |

Bold numbers indicate *p* <0.05. ID, intellectual disability; DEE, developmental and epileptic encephalopathies; ASD, autism spectrum disorder; ADHD, attention deficit hyperactivity disorder.

## References

1. Brownstein CA, Goldstein RD, Thompson CH, et al. SCN1A variants associated with sudden infant death syndrome. *Epilepsia*. Apr 2018;59(4):e56-e62. doi:10.1111/epi.14055
2. Rockowitz S, LeCompte N, Carmack M, et al. Children's rare disease cohorts: an integrative research and clinical genomics initiative. *NPJ Genom Med*. 2020;5:29. doi:10.1038/s41525-020-0137-0
3. Guethbjartsson H, Georgsson GF, Guethjonsson SA, et al. GORpipe: a query tool for working with sequence data based on a Genomic Ordered Relational (GOR) architecture. *Bioinformatics*. Oct 15 2016;32(20):3081-3088. doi:10.1093/bioinformatics/btw199
4. Jiang H, Lei R, Ding SW, Zhu S. Skewer: a fast and accurate adapter trimmer for next-generation sequencing paired-end reads. *BMC Bioinformatics*. Jun 12 2014;15:182. doi:10.1186/1471-2105-15-182
5. Andrews S. FastQC: a quality control tool for high throughput sequence data. Babraham Bioinformatics, Babraham Institute, Cambridge, United Kingdom; 2010.
6. Bushnell B. *BBMap: a fast, accurate, splice-aware aligner*. 2014.
7. Kendig KI, Baheti S, Bockol MA, et al. Sentieon DNaseq Variant Calling Workflow Demonstrates Strong Computational Performance and Accuracy. *Front Genet*. 2019;10:736. doi:10.3389/fgene.2019.00736
8. Jun G, Flickinger M, Hetrick KN, et al. Detecting and estimating contamination of human DNA samples in sequencing and array-based genotype data. *Am J Hum Genet*. Nov 2 2012;91(5):839-48. doi:10.1016/j.ajhg.2012.09.004
9. McLaren W, Gil L, Hunt SE, et al. The Ensembl Variant Effect Predictor. *Genome Biol*. Jun 6 2016;17(1):122. doi:10.1186/s13059-016-0974-4
10. Landrum MJ, Lee JM, Benson M, et al. ClinVar: public archive of interpretations of clinically relevant variants. *Nucleic Acids Res*. Jan 4 2016;44(D1):D862-8. doi:10.1093/nar/gkv1222
11. Lek M, Karczewski KJ, Minikel EV, et al. Analysis of protein-coding genetic variation in 60,706 humans. *Nature*. Aug 18 2016;536(7616):285-91. doi:10.1038/nature19057
12. Rentzsch P, Witten D, Cooper GM, Shendure J, Kircher M. CADD: predicting the deleteriousness of variants throughout the human genome. *Nucleic Acids Res*. Jan 8 2019;47(D1):D886-D894. doi:10.1093/nar/gky1016
13. Jaganathan K, Kyriazopoulou Panagiotopoulou S, McRae JF, et al. Predicting Splicing from Primary Sequence with Deep Learning. *Cell*. Jan 24 2019;176(3):535-548 e24. doi:10.1016/j.cell.2018.12.015
14. Robinson JT, Thorvaldsdottir H, Winckler W, et al. Integrative genomics viewer. *Nat Biotechnol*. Jan 2011;29(1):24-6. doi:10.1038/nbt.1754
15. Babadi M, Lee SK, Smirnov A, et al. Precise common and rare germline CNV calling with GATK. *Cancer Research*. 2018;78(13\_Supplement):2287-2287.
16. Firth HV, Richards SM, Bevan AP, et al. DECIPHER: Database of Chromosomal Imbalance and Phenotype in Humans Using Ensembl Resources. *Am J Hum Genet*. Apr 2009;84(4):524-33. doi:10.1016/j.ajhg.2009.03.010

## eFigures

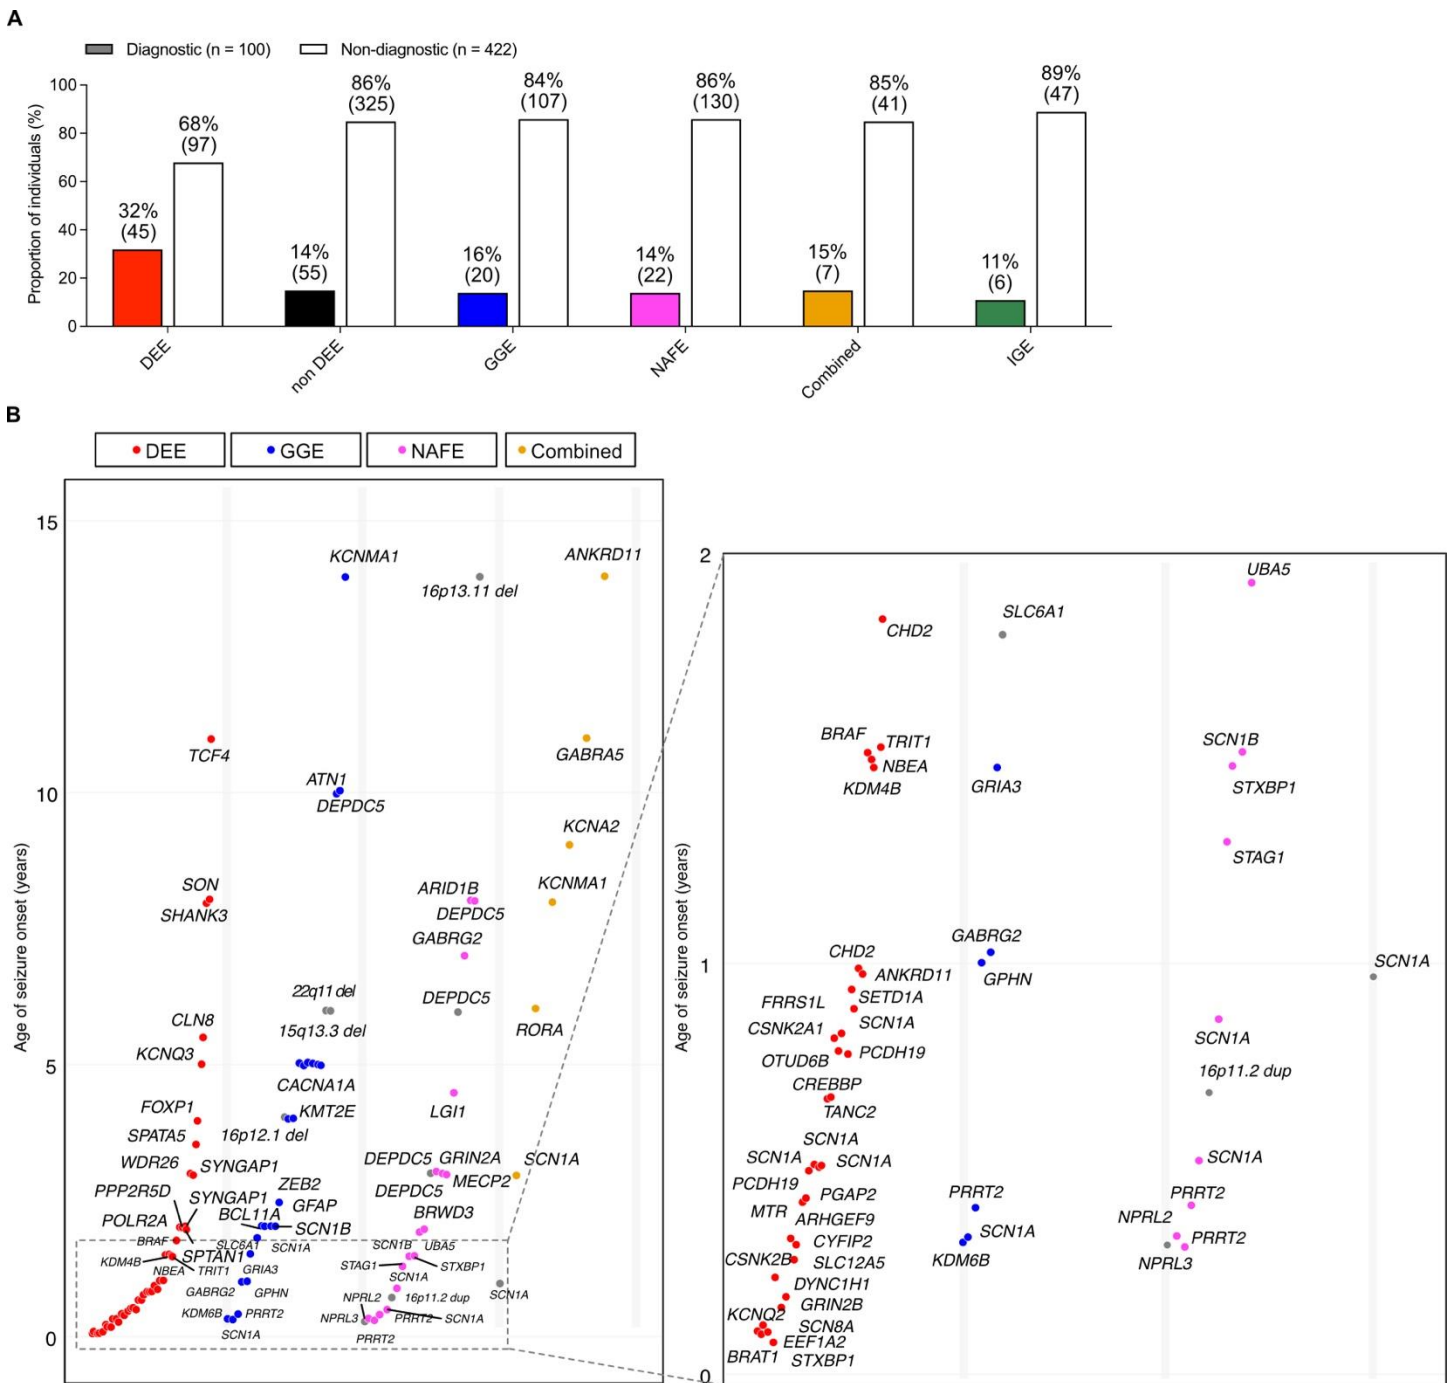

### eFigure 1. Diagnostic Yield and Age of Seizure Onset According to Epilepsy Type

(A) We demonstrate the proportion of individuals with each epilepsy type with respect to whether they had diagnostic vs. non-diagnostic findings. DEE was significantly associated with the presence of diagnostic variants. The percentage of diagnostic yield and number of individuals in each group is noted at the top of the columns. (B) We display the genes responsible for epilepsy in DEE, GGE, NAFE, and combined generalized and focal epilepsy in the 100 patients with diagnostic findings (89 SNVs, 11 CNVs). Findings of IGE are involved in GGE category. Each circle represents a diagnostic variant, either P/LP or diagnostic VUS, presented according to the age of seizure onset (Y axis) and epilepsy types (top labels). The box on the right details the genes identified in individuals under 2 years of age. Diagnostic CNVs are indicated by gray circles. (DEE: developmental and epileptic encephalopathy, GGE: genetic generalized epilepsy, NAFE: non-acquired focal epilepsy)

### Genes with diagnostic results (n = 100, 19%) by SNVs (n = 89, 17%) and CNVs (n = 11, 2%)

**1) Autosomal dominant:** *ANKRD11* [1+1\*], *ARHGEF9*, *ARID1B*\*, *ATN1*\*, *BCL11A*, *BRAF*\*, *CACNA1A*, *CACNA1G*\*, *CHD2* [1+1\*], *CREBBP*, *CSNK2A1*\*, *CSNK2B*, *CYFIP2*\*, *DEPDC5* [3+2\*], *DYNC1H1*\*, *EEF1A2*\*, *FOXP1*, *GABRA5*\*, *GABRG2* [2], *GFAP*, *GPHN*, *GRIN2A*, *GRIN2B*\*, *KCNA2*, *KCNMA1* [1+1\*], *KCNQ2*\*, *KCNQ3*\*, *KDM4B*\*, *KDM6B*\*, *KMT2E*\*, *LGI1*, *MECP2*\*, *NBEA*\*, *NEXMIF*\*†, *NPRL2*, *NPRL3*\*, *PCDH19* [1+1\*], *POLR2A*, *PPP2R5D*, *PRRT2* [2+1\*], *RORA*\*, *SCN1A* [3+5\*+1\*†+1\*\*], *SCN1B* [2], *SCN8A*\*, *SETD1A*\*, *SETD1B*\*, *SHANK3*\*, *SLC6A1*, *SON*\*, *SPTAN1*\*, *SRCAP*, *STAG1*\*, *STXBP1* [2], *SYNGAP1* [1+1\*], *TANC2*\*, *TCF4*\*, *WDR26*, *ZEB2*, 1q21.1 del\*, 15q13.3 del\*\*, 16p11.2 dup\*\*, 16p12.1 del\*, 16p13.11 del\*, 22q11 del\*\*

**2) Autosomal recessive:** *BRAT1*#, *CLN8*#, *FRRS1L*, *MTR*#, *OTUD6B*, *PGAP2*#, *POLG*#, *SLC12A5*, *SPATA5*#, *TRIT1*, *UBA5*#

**3) X-linked:** *BRWD3*†, *GRIA3*†

|                      |                             |                                            |                                   |
|----------------------|-----------------------------|--------------------------------------------|-----------------------------------|
| P/LP variants or VUS | Variants in candidate genes | VUS in known epilepsy genes (n = 161, 31%) | Variants not found (n = 205, 39%) |
|----------------------|-----------------------------|--------------------------------------------|-----------------------------------|

### Candidate epilepsy genes identified in our cohort (n = 93, 18%)

**1) Autosomal dominant:** *AGBL2*\*, *ALKBH1*\*, *ANKRD34B*\*, *ANLN*\*, *ARIH2*\*, *ATP6V1B2*\*, *ATXN2*\*, *BIRC6*\*, *BNC2*\*, *BRINP1*\*, *C12orf45*\*, *CAMKK1*\*, *CAMSAP3*\*, *CDH2*\*, *CHRM2*\*, *CLDN5*\*, *CPSF1*\*, *CSMD1*\*, *CTXN1*\*, *CUL3*\*, *DDX47*\*, *DNAJC4*\*, *DPYSL2*\*, *FAF1*\*, *FBXL18*\*, *FBXO44*\*, *FIZ1*\*, *FZD5*\*, *GLI3*\*, *GNAZ*\*, *GRID2IP*\*, *HDAC3*\*, *HELB*\*, *INO80*\*, *ITM2C*\*, *KHSRP*\*, *KIAA1211*\*, *KIAA1324L*\*†, *LMTK3*\*, *LYL1*\*, *MAOB*\*, *MCTP1*\*, *MEST*\*, *NCOR1*\*, *NEURL4*\*, *NOTCH2*\*, *NXT1*\*, *PAM*\*, *PDE4C*\*, *PPARD*\*, *PPFIA3*\*, *PRPF31*\*†, *ROBO1*\*, *RYK*\*, *SCUBE1*\*, *SEMA4B*\*, *SIPA1L1*\*, *SNRNP200*\*, *STK3*\*, *TCF12*\*, *THAP11*\*, *TMEM57*\*, *TNIP1*\*, *TNRC6A*\*, *TRPC7*\*, *TRPM7*\*, *TWIST1*\*, *XKR6*\*, *YBX3*\*, *ZBTB38*\*, *ZNF488*\*, *ZNF879*\*

**2) Autosomal recessive:** *ACAD9*#, *ACOT1*, *ANKRD27*, *CA5A*, *CELSR3*, *HTR3A*#, *MICALL2*, *NLRX1*, *SLC12A4*, *SLC2A8*, *TMEM151A*, *TUBA8*, *ZNF729*

**3) X-linked:** *CACNA1F*†, *GLRA4*†, *GNL3L*†, *KLHL13*†, *MAP3K15*†, *MORC4*†, *MXRA5*†, *OTUD6A*†, *PLXNB3* [2]†, *PRPS1*†, *RPS4X*†, *SLITRK2*†, *SYTL5*†, *TCEAL3*†, *USP51*†, *ZDHHC15*†

## eFigure 2. Established and Candidate Epilepsy Genes in the Study Cohort

Analyzing exome sequencing data from 522 patients with unexplained epilepsy, we identified diagnostic variants in 89 cases, 81 with P/LP variants and 15 individuals with VUS, 8 of which we determined to be diagnostic. These variants involve 69 genes (orange, details in Table 2 and eTable 1) associated with autosomal dominant, autosomal recessive, and X-linked conditions. Additionally, diagnostic CNVs were identified in 11 patients (details in Table 2 and eTable 5). In total, we identified diagnostic results for 100 patients. VUS in known epilepsy genes (in eTable2) were present in 161 individuals (purple, detailed information on variants provided in eTable 3). We identified rare, predicted damaging variants in candidate genes for epilepsy (genes of uncertain significance) in 93 cases, most of them apparently *de novo* variants (blue, detailed information on variants provided in eTable 4), and no explanatory or candidate variants for 205 cases (gray). The boxes list the identified genes (with the number of cases per gene shown in brackets if greater than 1) and, if known, their associated modes of inheritance (\**de novo*; #compound heterozygous; †X-linked hemizygous; ††mosaic; +CNV). (SNV: single nucleotide variant, CNV: copy number variant, P: pathogenic, LP: likely pathogenic, VUS: variant(s) of uncertain significance)

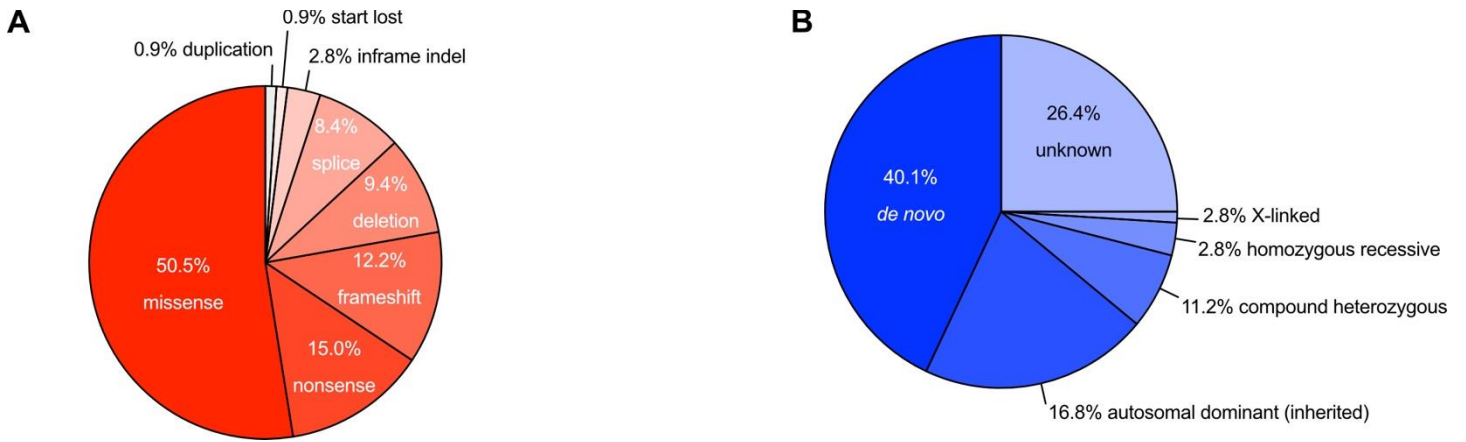

**eFigure 3. Variant Types Among the Diagnostic SNVs and CNVs**

We depict the predicted variant effects (**A**) and variant inheritance or *de novo* status (**B**). (SNV: single nucleotide variant, CNV: copy number variant, P: pathogenic, LP: likely pathogenic, VUS: variant(s) of uncertain significance)



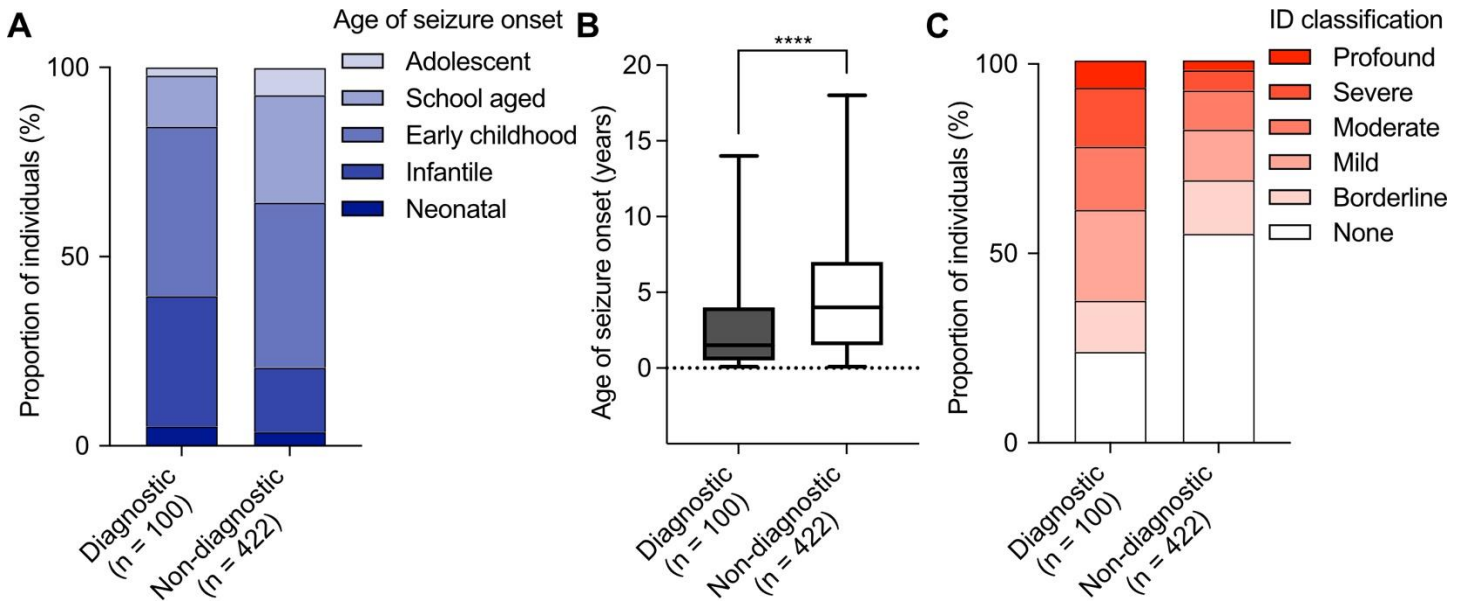

**eFigure 4. Clinical Features in Patients With Epilepsy Associated With Diagnostic Variants**  
**(A-B)** We evaluated the age ranges (represented in the **A**) and age of seizure onset (**B**) in diagnostic vs. non-diagnostic children with epilepsy. **(C)** Proportions of individuals with ID in the diagnostic vs. non-diagnostic groups are shown.  
 \*\*\*\* $P < 0.0001$ . (ID: intellectual disability)

## Appendix

Working group authors in BCH Neurology Referral and Phenotyping Group:

Elizabeth Barkoudah, MD  
Ann M. Bergin, MD  
Miya Bernson-Leung, MD, EdM  
Elizabeth Binney, MD  
Jeffrey Bolton, MD  
Stephanie Donatelli, MD  
Darius Ebrahimi-Fakhari, MD, PhD  
Mark P. Gorman, MD  
Chellamani Harini, MD  
Divya Jayaraman, MD, PhD  
Agnieszka A. Kielian, MD  
Lauren LaFortune, MD  
Kerri Larovere, MD  
Mark Libenson, MD  
David N. Lieberman, MD, PhD  
Tobias Loddenkemper, MD  
Candice E. Marti, CPNP  
Anna Minster, MD  
Kate Mysak, MS, CPNP  
Ann Paris, MS, CPNP, CNRN  
Archana A. Patel, MD, MPH  
Phillip L. Pearl, MD  
Jurriaan M. Peters, MD, PhD  
Anna Pinto, MD, PhD  
Peter Raffalli, MD  
Alexander Rotenberg, MD, PhD  
Catherine Salussolia, MD, PhD  
Rebecca Sarvendram, CPNP  
Hannah Shapiro, MD  
Janet Soul, MD  
Sarah Spence, MD, PhD  
Karen Spencer, MD, MS, MPH  
Robert C. Stowe, MD  
Coral M. Stredny, MD  
Masanori Takeoka, MD  
Molly Tracy, MD  
Sara K. Trowbridge, MD  
Melissa Tsuboyama, MD  
David K. Urion, MD
