# Supplementary material for: Utility of Exome Sequencing for Diagnosis in Unexplained Pediatric-Onset Epilepsy
Source: PubMed Central journal article supplement (PMC10359957; doi:10.1001/jamanetworkopen.2023.24380), 2023-07-20
Supplement: jamanetwopen-e2324380-s002.pdf [file jamanetwopen-e2324380-s002.pdf]

Supplemental Online Content: Nonauthor Collaborators

\*First name, last name, and suffix (if applicable) are required and will appear in PubMed.

| <b>*Group Name(s): BCH Neurology Referral and Phenotyping Group</b> |                   |                              |                         |                    |                                                 |                                                                |                                                                                                   |
|---------------------------------------------------------------------|-------------------|------------------------------|-------------------------|--------------------|-------------------------------------------------|----------------------------------------------------------------|---------------------------------------------------------------------------------------------------|
| <b>*First Name and Middle Initial(s)</b>                            | <b>*Last Name</b> | <b>*Suffix (eg, Jr, III)</b> | <b>Academic Degrees</b> | <b>Institution</b> | <b>Location (city, state/province, country)</b> | <b>Role or Contribution, eg, chair, principal investigator</b> | <b>Group (if more than 1 Group listed in the byline) and/or Subgroup (eg, Steering Committee)</b> |
| Elizabeth                                                           | Barkoudah         |                              |                         |                    |                                                 |                                                                |                                                                                                   |
| Ann M.                                                              | Bergin            |                              |                         |                    |                                                 |                                                                |                                                                                                   |
| Miya                                                                | Bernson-Leung     |                              |                         |                    |                                                 |                                                                |                                                                                                   |
| Elizabeth                                                           | Binney            |                              |                         |                    |                                                 |                                                                |                                                                                                   |
| Jeffrey                                                             | Bolton            |                              |                         |                    |                                                 |                                                                |                                                                                                   |
| Stephanie                                                           | Donatelli         |                              |                         |                    |                                                 |                                                                |                                                                                                   |
| Darius                                                              | Ebrahimi-Fakhari  |                              |                         |                    |                                                 |                                                                |                                                                                                   |
| Mark P.                                                             | Gorman            |                              |                         |                    |                                                 |                                                                |                                                                                                   |
| Chellamani                                                          | Harini            |                              |                         |                    |                                                 |                                                                |                                                                                                   |
| Divya                                                               | Jayaraman         |                              |                         |                    |                                                 |                                                                |                                                                                                   |
| Agnieszka A.                                                        | Kielian           |                              |                         |                    |                                                 |                                                                |                                                                                                   |
| Lauren                                                              | LaFortune         |                              |                         |                    |                                                 |                                                                |                                                                                                   |
| Kerri                                                               | Larovere          |                              |                         |                    |                                                 |                                                                |                                                                                                   |
| Mark                                                                | Libenson          |                              |                         |                    |                                                 |                                                                |                                                                                                   |
| David N.                                                            | Lieberman         |                              |                         |                    |                                                 |                                                                |                                                                                                   |
| Tobias                                                              | Loddenkemper      |                              |                         |                    |                                                 |                                                                |                                                                                                   |
| Candice E.                                                          | Marti             |                              |                         |                    |                                                 |                                                                |                                                                                                   |
| Anna                                                                | Minster           |                              |                         |                    |                                                 |                                                                |                                                                                                   |
| Kate                                                                | Mysak             |                              |                         |                    |                                                 |                                                                |                                                                                                   |
| Ann                                                                 | Paris             |                              |                         |                    |                                                 |                                                                |                                                                                                   |
| Archana A.                                                          | Patel             |                              |                         |                    |                                                 |                                                                |                                                                                                   |
| Phillip L.                                                          | Pearl             |                              |                         |                    |                                                 |                                                                |                                                                                                   |
| Jurriaan M.                                                         | Peters            |                              |                         |                    |                                                 |                                                                |                                                                                                   |
| Anna                                                                | Pinto             |                              |                         |                    |                                                 |                                                                |                                                                                                   |
| Peter                                                               | Raffalli          |                              |                         |                    |                                                 |                                                                |                                                                                                   |
| Alexander                                                           | Rotenberg         |                              |                         |                    |                                                 |                                                                |                                                                                                   |
| Catherine                                                           | Salussolia        |                              |                         |                    |                                                 |                                                                |                                                                                                   |
| Rebecca                                                             | Sarvendram        |                              |                         |                    |                                                 |                                                                |                                                                                                   |
| Hannah                                                              | Shapiro           |                              |                         |                    |                                                 |                                                                |                                                                                                   |
| Janet                                                               | Soul              |                              |                         |                    |                                                 |                                                                |                                                                                                   |
| Sarah                                                               | Spence            |                              |                         |                    |                                                 |                                                                |                                                                                                   |

Supplemental Online Content: Nonauthor Collaborators

\*First name, last name, and suffix (if applicable) are required and will appear in PubMed.

| <b>*First Name and Middle Initial(s)</b> | <b>*Last Name</b> | <b>*Suffix (eg, Jr, III)</b> | Academic Degrees | Institution | Location (city, state/province, country) | Role or Contribution, eg, chair, principal investigator | Group (if more than 1 Group listed in the byline) and/or Subgroup (eg, Steering Committee) |
|------------------------------------------|-------------------|------------------------------|------------------|-------------|------------------------------------------|---------------------------------------------------------|--------------------------------------------------------------------------------------------|
| Karen                                    | Spencer           |                              |                  |             |                                          |                                                         |                                                                                            |
| Robert C.                                | Stowe             |                              |                  |             |                                          |                                                         |                                                                                            |
| Coral M.                                 | Stredny           |                              |                  |             |                                          |                                                         |                                                                                            |
| Masanori                                 | Takeoka           |                              |                  |             |                                          |                                                         |                                                                                            |
| Molly                                    | Tracy             |                              |                  |             |                                          |                                                         |                                                                                            |
| Sara K.                                  | Trowbridge        |                              |                  |             |                                          |                                                         |                                                                                            |
| Melissa                                  | Tsuboyama         |                              |                  |             |                                          |                                                         |                                                                                            |
| David K.                                 | Urion             |                              |                  |             |                                          |                                                         |                                                                                            |
