# Supplementary material for: Utility of Exome Sequencing for Diagnosis in Unexplained Pediatric-Onset Epilepsy
Source: PubMed Central journal article supplement (PMC10359957; doi:10.1001/jamanetworkopen.2023.24380), 2023-07-20
Supplement: jamanetwopen-e2324380-s003.pdf [file jamanetwopen-e2324380-s003.pdf]

## Data Sharing Statement

Koh. Utility of Exome Sequencing for Diagnosis in Unexplained Pediatric-Onset Epilepsy. *JAMA Netw Open*. Published July 20, 2023. doi:10.1001/jamanetworkopen.2023.24380

### Data

**Data available:** Yes

**Data types:** Deidentified participant data

**How to access data:** Data will be made available on request from [annapurna.poduri@childrens.harvard.edu](mailto:annapurna.poduri@childrens.harvard.edu).

**When available:** With publication

### Supporting Documents

**Document types:** None

### Additional Information

**Who can access the data:** anyone requesting the data whose protocols allow use of deidentified phenotypic and genomic data

**Types of analyses:** for research purposes

**Mechanisms of data availability:** with a signed data use agreement

**Any additional restrictions:** n/a
